# Supplementary material
Source: PubMed Central journal article supplement (PMC4225580)
Supplement: mmc1.pdf [file mmc1.pdf]

The American Journal of Human Genetics, Volume 95

Supplemental Data

## **PRIMUS: Rapid Reconstruction of Pedigrees**

### **from Genome-Wide Estimates of Identity by Descent**

Jeffrey Staples, Dandi Qiao, Michael H. Cho, Edwin K. Silverman, University of Washington Center for Mendelian Genomics, Deborah A. Nickerson, and Jennifer E.

Below

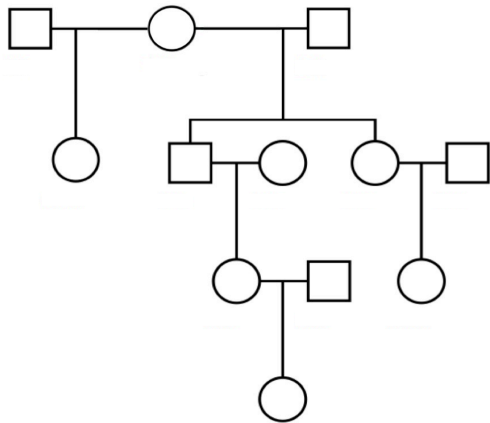

**Figure S1.** Schematic of a simulated 12-person pedigree. This pedigree contains all types of familial relationships shown in Table 1. We randomly assigned HapMap3 CEU haplotypes to each of the founders and then simulated recombination events to propagate these genotypes to the children.

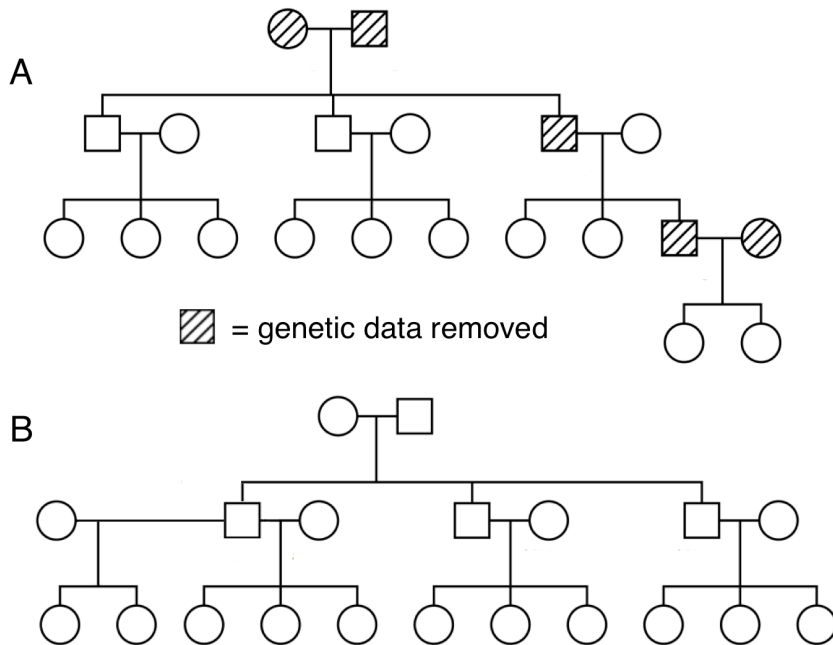

**Figure S2.** Examples of simulated pedigrees of size 20. A) Uniform size-20 pedigree with five samples for whom the genetic data was removed. The missing individuals simulated the real world case where you cannot get good genotypes from an individual either due to lack of consent, poor DNA quality, contamination, or absence of the individual. All of the remaining individuals are genotyped and are included in the pedigree and the reconstruction. B) Halfsib size-20 pedigree without any missing individuals.

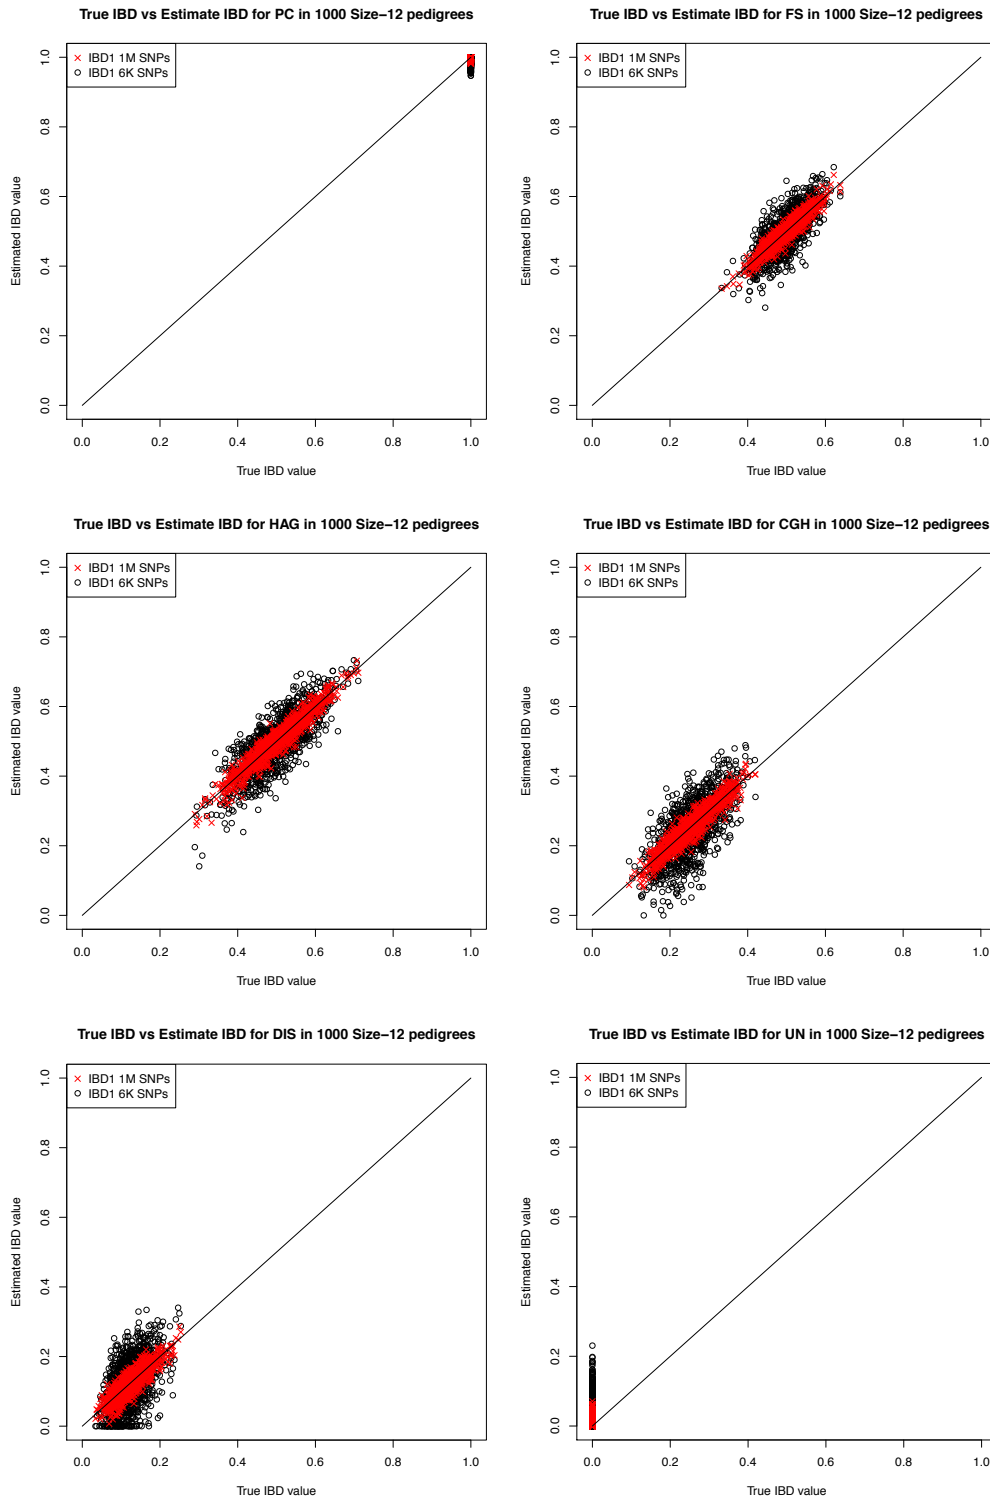

**Figure S3.** Comparison of the true IBD1 value to the PLINK IBD1 estimates for relationship sampled from 1000 size-12 pedigrees. Each graph shows the comparison of 6K SNPs and 1 million SNPs to the true IBD value. Each plot shows a different relationship category. IBD estimates generated from 6K SNPs have a much wider variance than the one IBD estimates generated from 1M SNPs. However, the distance that they depart from the expected value appears to remain fairly constant at each degree of relatedness.

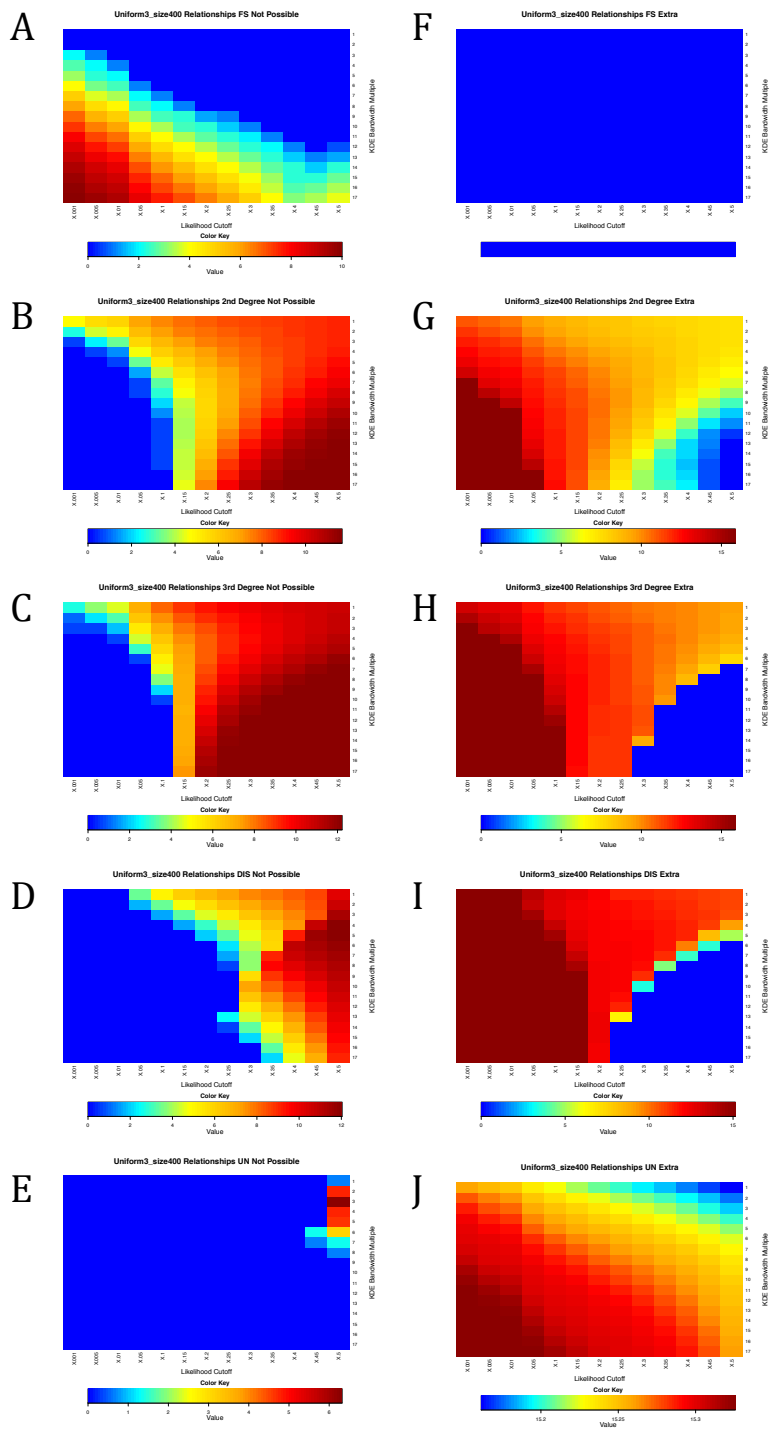

**Figure S4.** False positive (FP) and false negative (FN) relationship predictions with different KDE bandwidths and likelihood cutoffs for full-sibling (FS), 2<sup>nd</sup> degree, 3<sup>rd</sup> degree, distant (DIS) and unrelated (UN) relationships. We used these predictions to optimize the ability of PRIMUS to accurately identify the relationship between two individuals (true positive = 1 - FN) while minimizing the number of incorrect relationships that it predicts (FP). Since the optimal bandwidth would need to perform well across different likelihood cutoffs, we tested the performance of PRIMUS with likelihood cutoffs ranging from 0.01 to 0.5. We used the `scipy.stats.gaussian_kde` function (Web Resources) with two training features: genome-wide estimates of IBD0 and IBD1. We tested a range of bandwidths by specifying scalar values 1 through 17 as the “`bw_method`” option and these values are used as the

coefficient that multiplies the data covariance matrix to obtain the kernel covariance matrix. With KDEs trained at each bandwidth coefficient value from 1 to 17, we predicted the relationship category of each relationship in the 100 Uniform size-400 pedigrees at likelihood cutoffs varying from 0.01 to 0.5. We evaluated the relationship prediction of the KDEs trained with different bandwidths by testing their FN (results A-E) and FP (results F-J) rates. The color in each cell indicates the number of relationships from the 100 size-400 Uniform pedigrees that were either FN or FP. The color scale is  $\log_{10}$ . An FN occurs if the true relationship did not have a likelihood higher than the cutoff. An FP occurs if a relationship other than the true relationship has a likelihood higher than the likelihood cutoff. Parent-offspring relationships did not have any FP or FN predictions, so the corresponding heat maps are not shown. We selected the covariance factor for each relationship category that minimized the FP and FN predictions, and these are set as the default in PRIMUS: PO = 17; FS = 2; 2<sup>nd</sup> degree = 6; 3<sup>rd</sup> degree=5; DIS = 2; UN = 1. With an initial likelihood threshold higher than 0.3, we found a higher rate of false negative relationship predictions for 2<sup>nd</sup> degree, 3<sup>rd</sup> degree, and distantly related relationships in the Uniform size-400 pedigrees (Figure S3). However, lowering this threshold results in more relationships with likelihood scores that exceed the threshold. If there is more than one relationship category that exceeds the likelihood threshold, then PRIMUS will attempt to reconstruct a different version of the pedigree for each possible relationship, resulting in additional computational time. Therefore, we desired a default threshold that was lenient enough to reduce the chance of a false negative prediction, but also stringent enough to minimize the number of false positive relationships that are tested in the reconstruction. We chose 0.01 as the lower likelihood threshold bound because all relationship categories had 0% false negative rate at this threshold for their selected bandwidth. The strategy for the automatically lowering threshold is designed to capture the true pedigree while minimizing the runtime and the number of possible false positive pedigrees. This strategy assumes that PRIMUS will not output a pedigree structure until all true relationships have a likelihood higher than the likelihood threshold, and, thus, it will be able to reconstruct the true pedigree structure. There are rare scenarios (~0.5% of the simulations, Table S2) where PRIMUS did not output a correct pedigree structure before the threshold was low enough to correctly predict all familial relationships. Therefore, in this rare scenario, the true pedigree structure was not among the PRIMUS results. In these instances, PRIMUS can generate the true pedigree structure if the likelihood threshold is initially set low enough (e.g., 0.01). We chose 0.3 as the default because it provides the greatest savings in runtime and reduced number of possible pedigrees for the common uses of PRIMUS, but users can select a different value to fit their custom needs.

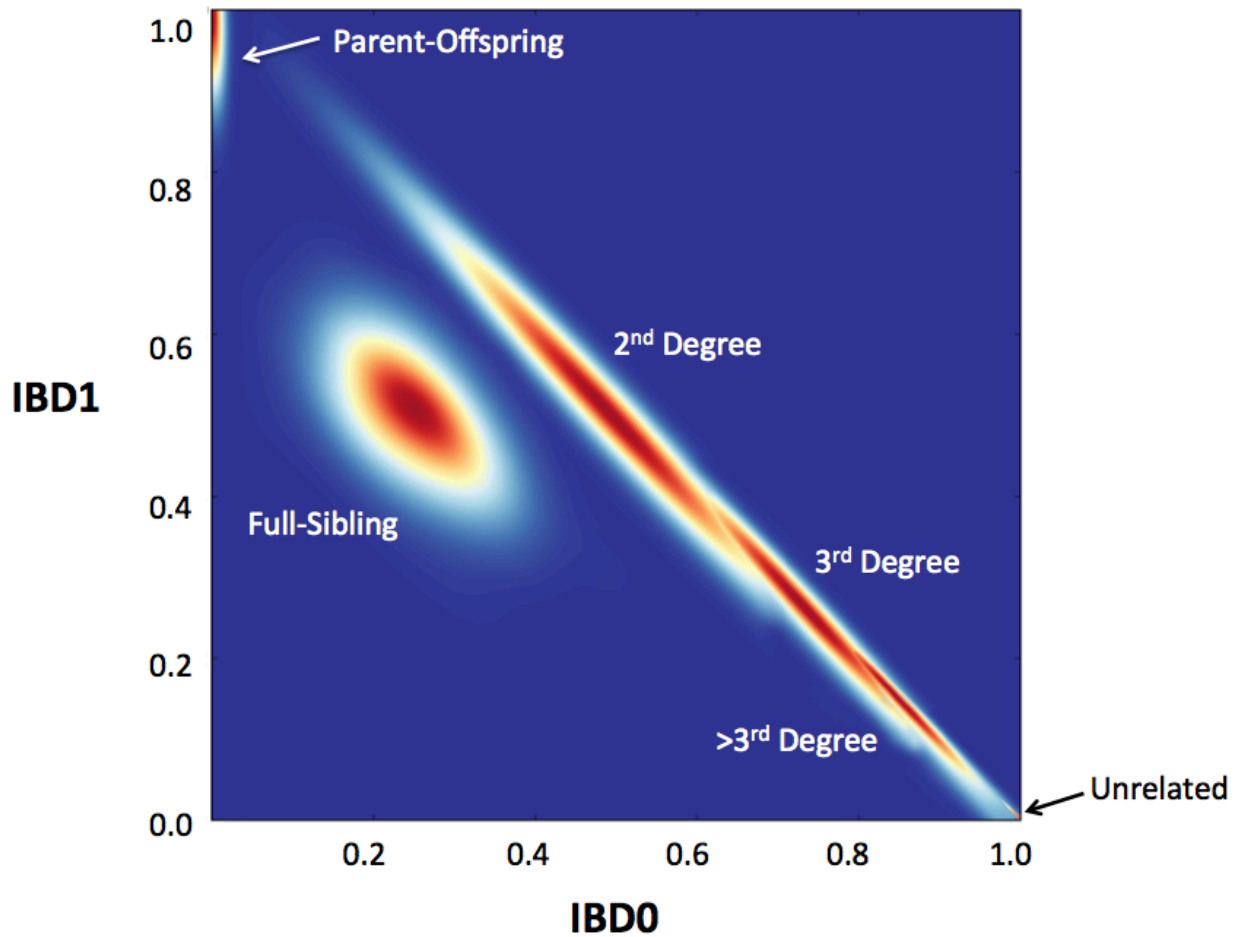

**Figure S5.** Kernel density distributions of the trained kernel density estimates for each familial relationship category. Parent-offspring and full-sibling are viably separated from the other density clusters. 2<sup>nd</sup> Degree and 3<sup>rd</sup> Degree are labeling the distribution of IBD estimates for 2<sup>nd</sup> and 3<sup>rd</sup> degree relationships, respectively. >3<sup>rd</sup> degree and “Unrelated” label the distributions of IBD estimates for relatives more distant than 3<sup>rd</sup> degree or unrelated, respectively.

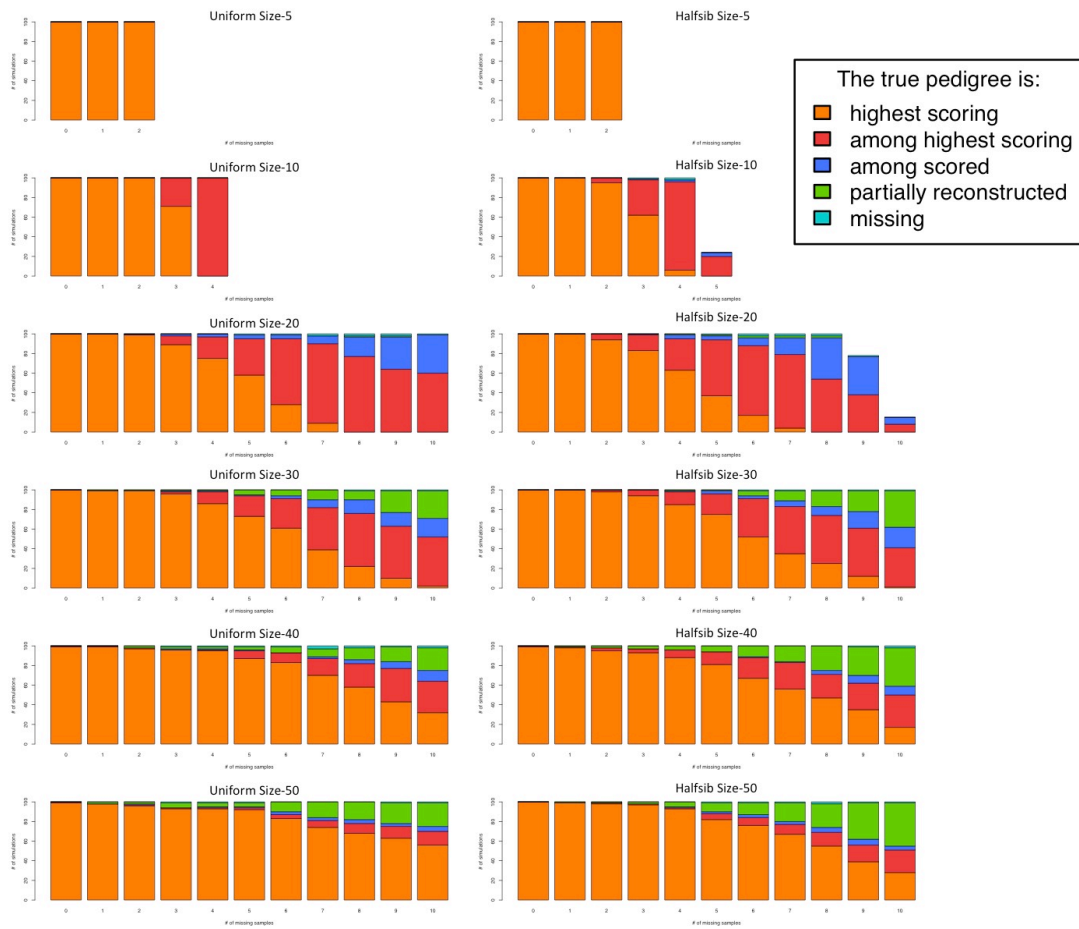

**Figure S6.** Results from the reconstruction of simulated pedigrees. We simulated 100 pedigrees for each size from five to 50 and for both Uniform and Halfsib pedigree structures. We removed up to ten samples from each pedigree and reconstructed each in PRIMUS. For each simulation we determined where the true pedigree fell among the ranked reconstruction results. Each bar displays the proportion of the 100 simulations that corresponded to the five reconstruction outcomes. Some of the Halfsib pedigree structures allowed for more samples to be removed than others due to the random nature of how they were simulated. As a result, Halfsib size-10 with five missing samples and size-20 with nine and ten missing samples do not have 100 unique simulations. The different outcomes are defined as follows:

**“highest scoring”** – The true pedigree is the highest scoring pedigree

**“among highest scoring”** – PRIMUS output contained more than one possible pedigree, and the true pedigree is tied as the highest scoring pedigree with one or more other pedigrees

**“among scored”** – the true pedigree is not the highest scoring pedigree, but is among the pedigrees generated by PRIMUS

**“partial reconstruction”** – the complete reconstruction either resulted in too many possible pedigrees, ran out of memory, or took longer than 36 hours to run, and, as a result, only a partial reconstruction using 1<sup>st</sup> degree relationships was generated

**“missing”** – PRIMUS reconstructed one or more possible pedigrees, but the true pedigree was not among them

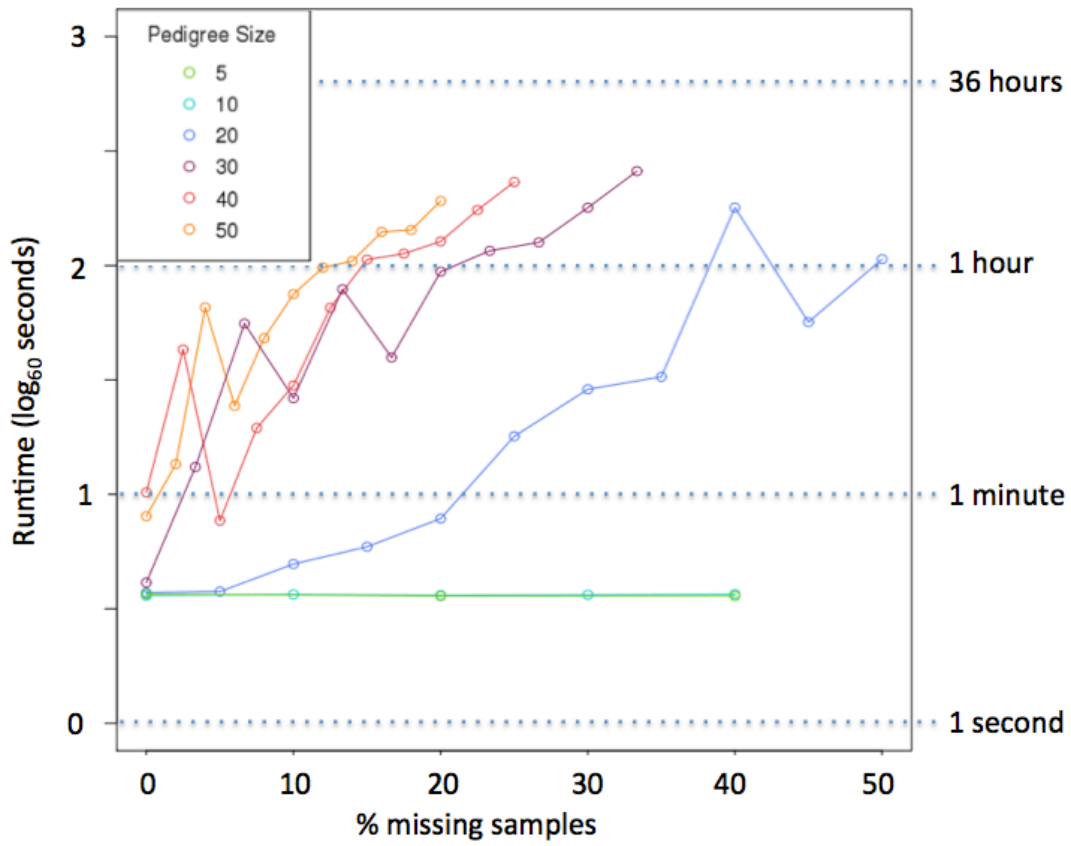

**Figure S7.** Simulation runtime results. These simulations were run on a single Intel Xeon CPU X5690 @ 3.47GHz with up to 35GB of RAM.



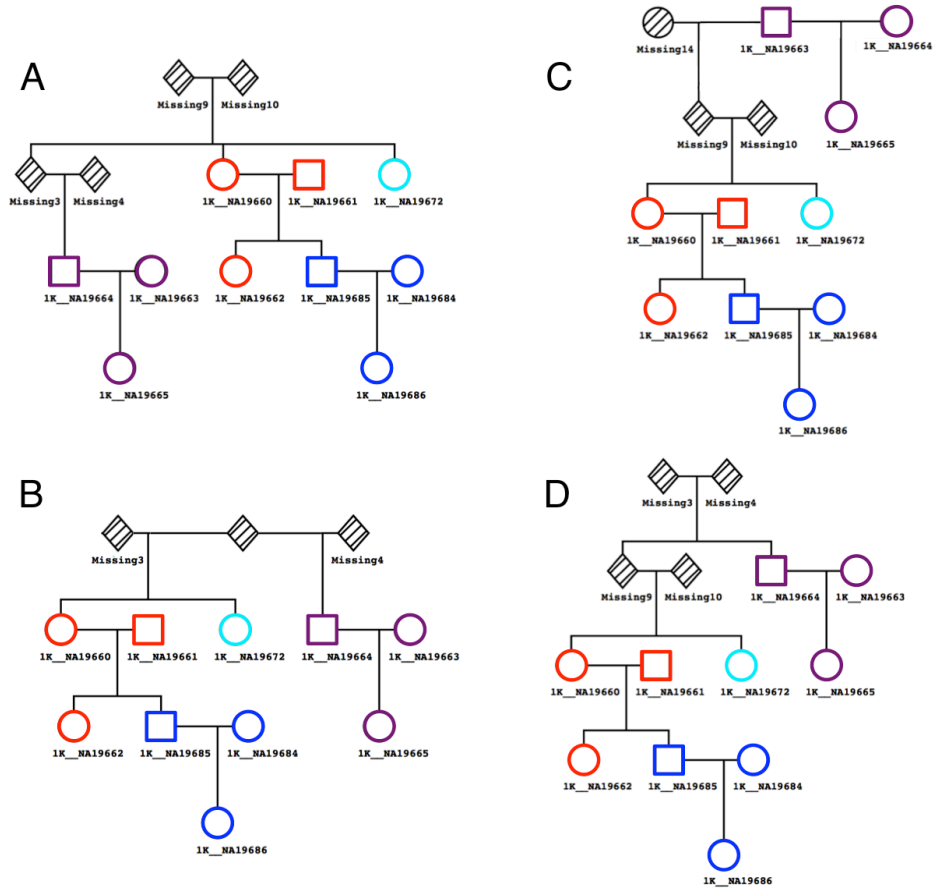

**Figure S8.** A ten-person MapMap3 MXL pedigree obtained from the HapMap3 and 1000 Genomes samples. The pedigree includes three reported trios (each colored differently) from HapMap3 and an additional individual from the 1000 Genomes Project. The pedigree shown in A is one of four possible pedigrees that fit the estimated IBD proportions and is the pedigree previously reported<sup>1</sup>. Alternative possible pedigrees that fit the genetic data are shown in B, C, and D. For these MXL samples, PREPARE reported a single sibling relationship (NA19662, NA19685), the two first-cousin relationships (NA19662-NA19664 and NA19664-NA19685). PREPARE is presented to have automatically reconstructed the nine-person HapMap3 MXL pedigree reported in the CARROT paper<sup>1</sup>, but they only show that NA19686 (incorrectly labeled as NA19685 in Figure 14 of their paper<sup>2</sup>) and NA19665 are 2<sup>nd</sup> cousins. Unlike the PRIMUS automatic reconstruction (Figure S8), they do not show how the other eight individuals fit into the pedigree, nor do they acknowledge that there are four different pedigree structures that fit the genetic data.

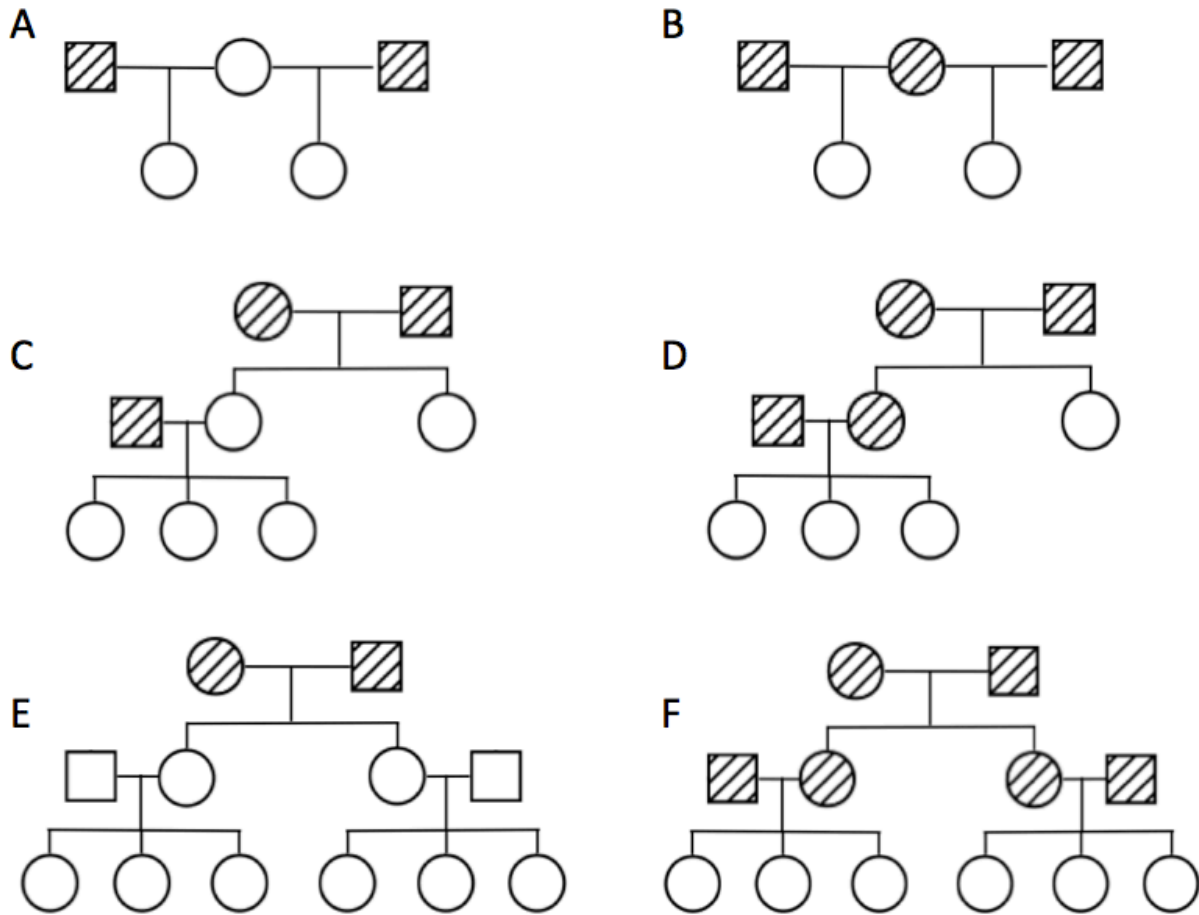

Figure S9. Examples of simple and common pedigrees structures. Diagonal lines through an individual's symbol indicate that DNA data are unavailable for that individual. PRIMUS can easily reconstruct all six pedigree structures. PREPARE<sup>2</sup> and IPED2 (He *et al.*, in press) can reconstruct pedigrees B and F because they require that all genotyped samples be in the same generation. If we had prior knowledge of each of these pedigrees, ages of the samples, or knowledge of who was in which generation, then PREPARE and IPED2 could do partial reconstructions of the lowest generation of each pedigree and the middle generation of C by discarding the other genotyped individuals. IPED<sup>3</sup> and COP/CIP<sup>4</sup> can only reconstruct pedigree F, because they are unable to handle half-sibling relationships, but could do the same partial reconstruction of the same pedigrees as PREPARE and IPED, except for A.

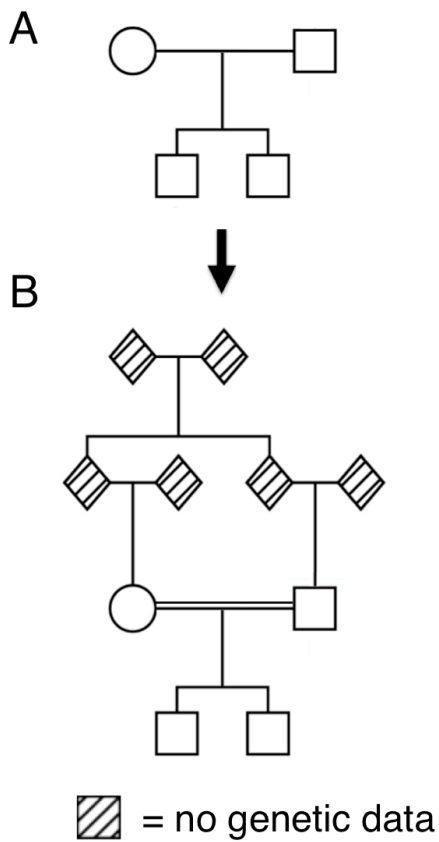

**Figure S10.** A pedigree submitted to the UW Center for Mendelian Genomics. The parents were reported as unrelated individuals by the clinician as depicted in pedigree A, but PRIMUS reconstructed them as first cousins, as depicted in pedigree B.

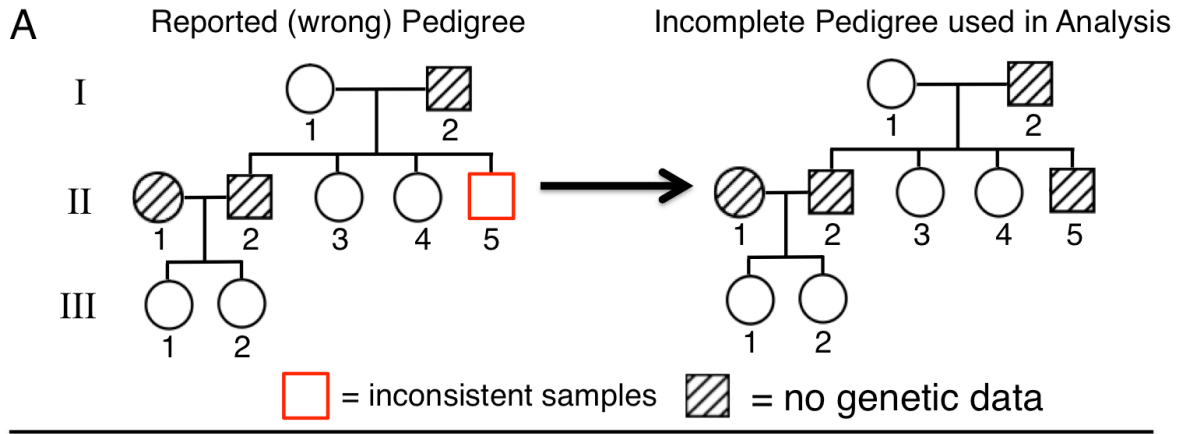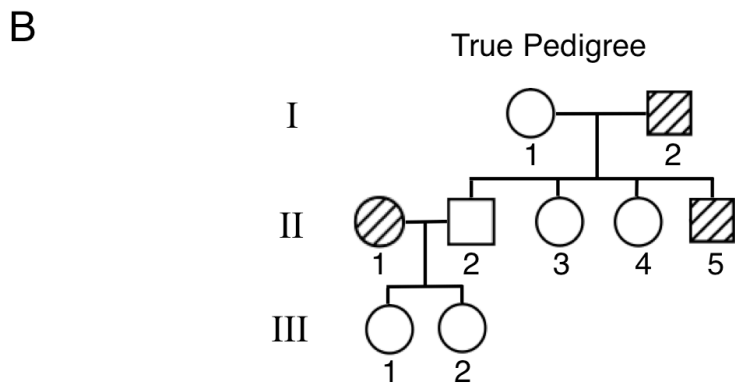

Figure S11. A single example where pairwise relationship checking and removal of an inconsistent sample results in an unnecessary loss of data. Panel A shows the reported pedigree as provided by the investigator. Pairwise relationship checking reveals that all relationships are correct except between sample II-5 and the siblings III-1 and III-2. Standard practice is to remove inconsistent samples, in this case sample II-5, resulting in the 5-person pedigree on the right. Panel B shows the true pedigree where sample II-5 was actually the father of the siblings III-1 and III-2 instead of individual II-2, who was not successfully genotyped, being the father. The mix-up could realistically be explained by a sample swap or by misspecified paternity for the two children, and these types of errors are common. Pedigree reconstruction would have revealed the inconsistency and would have easily reconstructed the true pedigree. Therefore, rather than discarding 17% of the data, the investigator could have retained all samples.

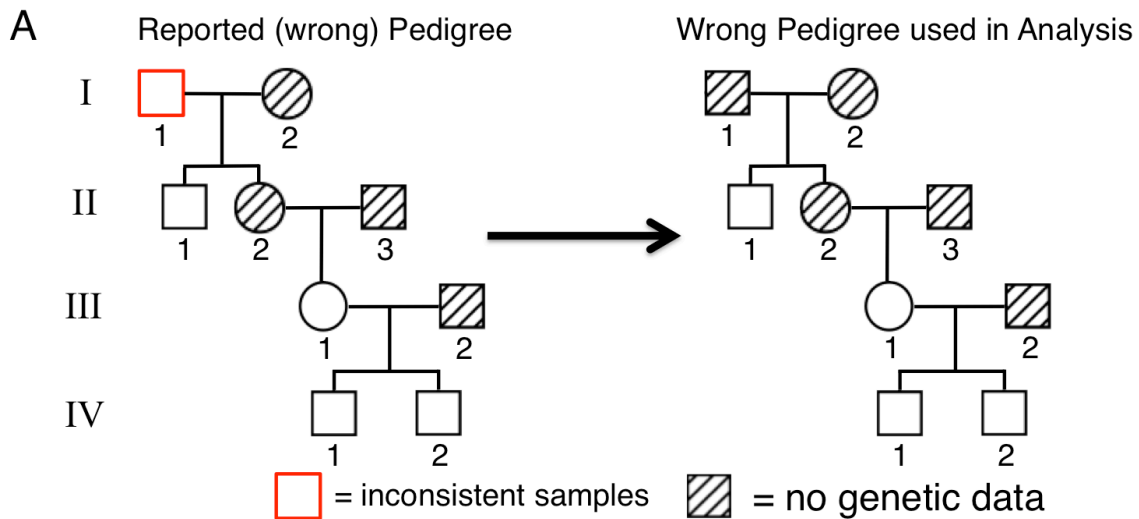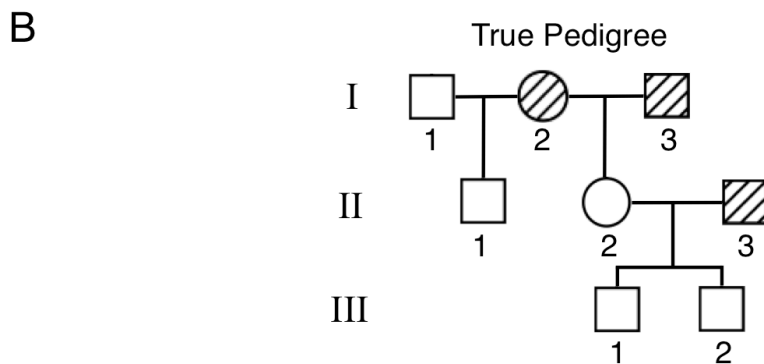

Figure S12. A single example where pairwise relationship checking and removal of an inconsistent sample results in an unnecessary loss of data and the use of an incorrect pedigree. Panel A shows the pedigree as reported by the investigator. Pairwise relationship checking reveals that all relationships are correct except between sample I-1 and samples III-1, IV-1, and IV-2. Standard practice is to remove inconsistent samples, in this case sample I-1, resulting in the 4-person pedigree on the right. Panel B shows the true pedigree. The error in the original pedigree was that sample II-1 was incorrectly assigned as the uncle to sample III-1, when, in fact, they were half-siblings. This mix-up could realistically be explained if the family incorrectly reported their family history or by a clerical error, and these types of errors are common. Pedigree reconstruction would easily have revealed the inconsistency and would have reconstructed the true pedigree. Therefore, rather than discarding 20% of the data and assuming an incorrect pedigree, the investigator would have retained all samples and used the true pedigree in further analyses.

Table S1. True IBD vs. Estimated IBD for different SNP sets

| # of SNPs        | IBD0 $r^2$ | IBD1 $r^2$ | IB2 $r^2$ |
|------------------|------------|------------|-----------|
| 6K               | 0.987      | 0.981      | 0.961     |
| 10K              | 0.992      | 0.99       | 0.984     |
| 20K              | 0.995      | 0.993      | 0.99      |
| 50K              | 0.997      | 0.996      | 0.997     |
| 100K             | 0.997      | 0.997      | 0.997     |
| 1000K            | 0.998      | 0.998      | 0.997     |
| Linkage Panel IV | 0.979      | 0.974      | 0.97      |
| Affy 6.0         | 0.998      | 0.997      | 0.993     |
| CytoSNP          | 0.998      | 0.997      | 0.994     |
| HumanCore        | 0.998      | 0.997      | 0.996     |
| Omni Express     | 0.998      | 0.998      | 0.995     |
| Omni 2.5         | 0.998      | 0.998      | 0.995     |

SNP sets 6K-1000K were generated using PLINK to trim the HapMap3 dataset down to the desired number of SNPs. The remaining SNP sets were generated by taking the intersection of SNPs in those panels and HapMap3. IBD estimates were generated with PLINK using SNPs with a minor allele frequency >1% and a call rate >90%. In statistical package R, we plotted the true IBD proportion to the estimated IBD proportion for each relationship in the 100 halfsib size-20 pedigrees. We then calculated  $r^2$  based on the deviation from  $Y=X$ .

Table S2. Combined simulation reconstruction results

| Size | structure               | 0 Missing samples | 1 Missing samples | 2 Missing samples | 3 Missing samples | 4 Missing samples | 5 Missing samples | 6 Missing samples | 7 Missing samples | 8 Missing samples | 9 Missing samples | 10 Missing samples |
|------|-------------------------|-------------------|-------------------|-------------------|-------------------|-------------------|-------------------|-------------------|-------------------|-------------------|-------------------|--------------------|
| 5    | highest scoring         | 200               | 200               | 200               | NA                 |
| 5    | among highest scoring   | 0                 | 0                 | 0                 | NA                 |
| 5    | among scored            | 0                 | 0                 | 0                 | NA                 |
| 5    | partially reconstructed | 0                 | 0                 | 0                 | NA                 |
| 5    | missing                 | 0                 | 0                 | 0                 | NA                 |
| 10   | highest scoring         | 200               | 200               | 195               | 133               | 6                 | 0                 | NA                | NA                | NA                | NA                | NA                 |
| 10   | among highest scoring   | 0                 | 0                 | 5                 | 65                | 190               | 20                | NA                | NA                | NA                | NA                | NA                 |
| 10   | among scored            | 0                 | 0                 | 0                 | 1                 | 2                 | 4                 | NA                | NA                | NA                | NA                | NA                 |
| 10   | partially reconstructed | 0                 | 0                 | 0                 | 0                 | 0                 | 0                 | NA                | NA                | NA                | NA                | NA                 |
| 10   | missing                 | 0                 | 0                 | 0                 | 1                 | 2                 | 0                 | NA                | NA                | NA                | NA                | NA                 |
| 20   | highest scoring         | 200               | 200               | 193               | 172               | 138               | 95                | 45                | 13                | 0                 | 0                 | 0                  |
| 20   | among highest scoring   | 0                 | 0                 | 6                 | 25                | 54                | 94                | 138               | 156               | 131               | 102               | 68                 |
| 20   | among scored            | 0                 | 0                 | 1                 | 3                 | 7                 | 8                 | 12                | 25                | 62                | 72                | 46                 |
| 20   | partially reconstructed | 0                 | 0                 | 0                 | 0                 | 1                 | 1                 | 2                 | 2                 | 3                 | 1                 | 0                  |
| 20   | missing                 | 0                 | 0                 | 0                 | 0                 | 0                 | 2                 | 3                 | 4                 | 4                 | 3                 | 1                  |
| 30   | highest scoring         | 200               | 199               | 197               | 190               | 171               | 148               | 113               | 74                | 47                | 22                | 3                  |
| 30   | among highest scoring   | 0                 | 0                 | 2                 | 8                 | 25                | 42                | 69                | 91                | 103               | 102               | 90                 |
| 30   | among scored            | 0                 | 0                 | 0                 | 1                 | 2                 | 4                 | 6                 | 14                | 23                | 31                | 40                 |
| 30   | partially reconstructed | 0                 | 1                 | 1                 | 1                 | 2                 | 6                 | 11                | 20                | 25                | 43                | 65                 |
| 30   | missing                 | 0                 | 0                 | 0                 | 0                 | 0                 | 0                 | 1                 | 1                 | 2                 | 2                 | 2                  |
| 40   | highest scoring         | 198               | 197               | 192               | 189               | 183               | 168               | 150               | 126               | 105               | 78                | 49                 |
| 40   | among highest scoring   | 2                 | 2                 | 4                 | 4                 | 9                 | 21                | 31                | 44                | 48                | 61                | 65                 |
| 40   | among scored            | 0                 | 0                 | 0                 | 1                 | 1                 | 1                 | 1                 | 3                 | 8                 | 15                | 20                 |
| 40   | partially reconstructed | 0                 | 1                 | 4                 | 5                 | 6                 | 9                 | 17                | 24                | 37                | 44                | 62                 |
| 40   | missing                 | 0                 | 0                 | 0                 | 1                 | 1                 | 1                 | 1                 | 3                 | 2                 | 2                 | 4                  |
| 50   | highest scoring         | 199               | 197               | 194               | 190               | 186               | 174               | 159               | 141               | 123               | 102               | 84                 |
| 50   | among highest scoring   | 1                 | 0                 | 2                 | 2                 | 2                 | 8                 | 12                | 17                | 24                | 29                | 37                 |
| 50   | among scored            | 0                 | 0                 | 1                 | 0                 | 2                 | 3                 | 6                 | 6                 | 9                 | 9                 | 9                  |
| 50   | partially reconstructed | 0                 | 3                 | 3                 | 7                 | 9                 | 13                | 22                | 35                | 42                | 58                | 68                 |
| 50   | missing                 | 0                 | 0                 | 0                 | 1                 | 1                 | 2                 | 1                 | 1                 | 2                 | 2                 | 2                  |

We combined the reconstruction results for both the Uniform and Halfsib pedigrees. Some of the Halfsib pedigree structures allowed for more samples to be removed than others due to the random

nature of how they were simulated. As a result, Halfsib size-10 with five missing samples and size-20 with nine and ten missing samples do not add up to 200 simulations. We ran 100 simulations for each size and % of missing samples. For each simulation we determined where the true pedigree fell among the ranked reconstruction results. Each bar displays the proportion of the 100 simulations that corresponded to the five reconstruction outcomes defined as follows:

**“highest scoring”** – The true pedigree is the highest scoring pedigree

**“among highest scoring”** – PRIMUS output contained more than one possible pedigree and the true pedigree is tied as the highest scoring pedigree with one or more other pedigrees

**“among scored”** – the true pedigree is not the highest scoring pedigree, but is among the pedigrees generated by PRIMUS

**“partial reconstruction”** – the complete reconstruction either resulted in too many possible pedigrees, ran out of memory, or took longer than 36 hours to run and as a result only a partial reconstruction using 1<sup>st</sup> degree relationships was generated

**“missing”** – PRIMUS reconstructed one or more possible pedigrees, but the true pedigree was not among them



Table S3. The accuracy of PRIMUS and RELPAIR<sup>5</sup> relationship predictions with Halfsib size-20 pedigrees.

| <b>PRIMUS</b>                            |         |         |         |         |         |         |         |         |         |
|------------------------------------------|---------|---------|---------|---------|---------|---------|---------|---------|---------|
| Percent Missing samples                  | 0%      | 5%      | 10%     | 15%     | 20%     | 25%     | 30%     | 35%     | 40%     |
| 1st degree category                      | 100.00% | 100.00% | 100.00% | 100.00% | 100.00% | 100.00% | 100.00% | 100.00% | 100.00% |
| 2nd degree category                      | 100.00% | 100.00% | 100.00% | 100.00% | 99.79%  | 99.63%  | 99.55%  | 99.35%  | 99.55%  |
| 3rd degree category                      | 100.00% | 100.00% | 100.00% | 99.79%  | 98.81%  | 99.26%  | 98.30%  | 96.27%  | 93.37%  |
| Distantly/unrelated                      | 100.00% | 100.00% | 100.00% | 100.00% | 100.00% | 100.00% | 100.00% | 100.00% | 100.00% |
| 1st degree relationship type             | 100.00% | 100.00% | 100.00% | 100.00% | 100.00% | 100.00% | 100.00% | 100.00% | 100.00% |
| 2nd degree relationship type             | 100.00% | 100.00% | 99.37%  | 97.12%  | 96.00%  | 88.45%  | 75.61%  | 66.88%  | 58.48%  |
| 3rd degree relationship type             | 100.00% | 100.00% | 98.13%  | 95.42%  | 92.46%  | 85.68%  | 63.67%  | 46.73%  | 26.54%  |
| 1st degree relationship type + direction | 100.00% | 100.00% | 100.00% | 99.86%  | 99.84%  | 99.57%  | 99.54%  | 99.52%  | 99.92%  |
| 2nd degree relationship type + direction | 100.00% | 100.00% | 99.41%  | 97.80%  | 96.89%  | 91.18%  | 80.92%  | 73.76%  | 61.95%  |
| 3rd degree relationship type + direction | 100.00% | 100.00% | 96.87%  | 93.37%  | 91.90%  | 86.43%  | 68.29%  | 45.41%  | 14.15%  |
|                                          |         |         |         |         |         |         |         |         |         |
| <b>RELPAIR</b>                           |         |         |         |         |         |         |         |         |         |
| Percent Missing samples                  | 0%      | 5%      | 10%     | 15%     | 20%     | 25%     | 30%     | 35%     | 40%     |
| 1st degree category                      | 100.00% | 100.00% | 100.00% | 100.00% | 100.00% | 100.00% | 100.00% | 100.00% | 100.00% |
| 2nd degree category                      | 99.98%  | 99.98%  | 99.97%  | 99.97%  | 99.97%  | 99.96%  | 100.00% | 100.00% | 100.00% |
| 3rd degree category                      | 82.72%  | 82.89%  | 82.98%  | 83.13%  | 83.22%  | 83.25%  | 83.32%  | 83.48%  | 83.57%  |
| Distantly/unrelated                      | 97.17%  | 96.67%  | 96.04%  | 95.07%  | 93.75%  | 91.77%  | 88.16%  | 82.52%  | 66.98%  |
| 1st relationship type                    | 100.00% | 100.00% | 100.00% | 100.00% | 100.00% | 100.00% | 100.00% | 100.00% | 100.00% |
| 2nd relationship type                    | 55.95%  | 55.27%  | 55.81%  | 56.18%  | 56.68%  | 57.17%  | 56.20%  | 57.60%  | 55.89%  |
| 3rd relationship type                    | NA      |
| 1st degree relationship type + direction | NA      |
| 2nd degree relationship type + direction | NA      |
| 3rd degree relationship type + direction | NA      |

Halfsib size-20 pedigrees with 0% to 40% missing samples were used to test the pairwise relationship prediction accuracy of both PRIMUS and RELPAIR<sup>5</sup>. We compared the pairwise relationship of the highest ranked pedigree in PRIMUS to the true simulated relationship. We used the method employed by Pemberton et al.<sup>6</sup> to obtain the RELPAIR prediction and then compared that to the true simulated relationship. The table shows accuracy of each method at correctly predicting each relationship in the pedigree by the degree of relatedness (e.g., A and B are first degree relatives), the type of relationship (e.g., A and B have a parental relationship), and the type and directionality of the relationship (e.g., A is the parent of B). The results have been grouped by the degree of the relationships. RELPAIR does not make a distinction between the four 3<sup>rd</sup> degree relationships nor is it able to predict the directionality of pairwise relationships; therefore, NA is used for those results. The highlighted results are the ones plotted in Figure 2.

Table S4. EOCOPD pedigree reconstruction summary

| Fam FID | Reconstructed Correctly | Number of Genotyped Samples | Reconstructed FIDs | Expected Pedigree Rank | Number of Possible Pedigrees | Explanation                                               |
|---------|-------------------------|-----------------------------|--------------------|------------------------|------------------------------|-----------------------------------------------------------|
| Fam1    | 1                       | 11                          | 1                  | 1                      | 2                            |                                                           |
| Fam2    | 1                       | 8                           | 2                  | 1                      | 1                            |                                                           |
| Fam3    | 1                       | 13                          | 3                  | 2                      | 2                            |                                                           |
| Fam4    | 1                       | 3                           | 4                  | 1                      | 1                            |                                                           |
| Fam5    | 1                       | 15                          | 5                  | 1                      | 1                            |                                                           |
| Fam6    | 0                       | 9                           | 6                  | NA                     | 20                           | NON PATERNITY CAUGHT: half sib is actually full sib       |
| Fam7    | 1                       | 10                          | 7                  | 20                     | 28                           |                                                           |
| Fam8    | 1                       | 9                           | 8                  | 1                      | 1                            |                                                           |
| Fam9    | 1                       | 8                           | 9                  | 1                      | 1                            |                                                           |
| Fam10   | 1                       | 9                           | 10                 | 1                      | 1                            |                                                           |
| Fam11   | 1                       | 4                           | 11                 | 3                      | 7                            |                                                           |
| Fam12   | 1                       | 2                           | 12                 | 1                      | 1                            |                                                           |
| Fam13   | 1                       | 3                           | 13                 | 1                      | 1                            |                                                           |
| Fam14   | 1                       | 5                           | 14                 | 1                      | 1                            |                                                           |
| Fam15   | 1                       | 2                           | 15                 | 2                      | 2                            |                                                           |
| Fam16   | 1                       | 2                           | 16                 | 1                      | 1                            |                                                           |
| Fam17   | 1                       | 8                           | 17                 | 1                      | 1                            |                                                           |
| Fam18   | 1                       | 6                           | 18                 | 1                      | 2                            |                                                           |
| Fam19   | 1                       | 5                           | 19                 | 32                     | 33                           |                                                           |
| Fam20   | 1                       | 15                          | 20                 | 4                      | 11                           |                                                           |
| Fam21   | 1                       | 5                           | 21                 | 1                      | 1                            |                                                           |
| Fam22   | 1                       | 13                          | 22                 | 1                      | 2                            |                                                           |
| Fam23   | 1                       | 8                           | 23                 | 2                      | 3                            |                                                           |
| Fam24   | 0                       | 10                          | 24                 | NA                     | 5                            | NON PATERNITY CAUGHT: half avuncular instead of avuncular |
| Fam25   | 1                       | 5                           | 25                 | 1                      | 1                            |                                                           |
| Fam26   | 1                       | 6                           | 26                 | 1                      | 2                            |                                                           |
| Fam27   | 1                       | 6                           | 27                 | 1                      | 1                            |                                                           |
| Fam28   | 1                       | 14                          | 28                 | 1                      | 1                            |                                                           |
| Fam29   | 1                       | 3                           | 29                 | 1                      | 1                            |                                                           |
| Fam30   | 1                       | 11                          | 30                 | 1                      | 2                            |                                                           |
| Fam31   | 1                       | 5                           | 31                 | 1                      | 1                            |                                                           |
| Fam32   | 0                       | 6                           | 32                 | NA                     | 4                            | NON PATERNITY CAUGHT                                      |

|       |   |    |       |    |   |                                                          |
|-------|---|----|-------|----|---|----------------------------------------------------------|
| Fam33 | 1 | 3  | 33    | 1  | 1 |                                                          |
| Fam34 | 1 | 4  | 34    | 1  | 4 |                                                          |
| Fam35 | 0 | 6  | 35,39 | NA | 1 | Sample missing because of duplicate; Also non-paternity; |
| Fam36 | 1 | 3  | 36    | 1  | 1 |                                                          |
| Fam37 | 1 | 2  | 37    | 2  | 5 |                                                          |
| Fam38 | 1 | 3  | 38    | 1  | 1 |                                                          |
| Fam39 | 1 | 15 | 39    | 3  | 3 | Contains duplicate sample                                |
| Fam40 | 1 | 5  | 40    | 1  | 1 |                                                          |
| Fam41 | 1 | 6  | 41    | 1  | 3 |                                                          |
| Fam42 | 1 | 5  | 42    | 1  | 1 |                                                          |
| Fam43 | 1 | 9  | 43    | 4  | 6 |                                                          |
| Fam44 | 1 | 14 | 44    | 1  | 2 |                                                          |
| Fam45 | 0 | 7  | 45    | NA | 1 | NON PATERNITY CAUGHT                                     |
| Fam46 | 1 | 3  | 46    | 1  | 1 |                                                          |
| Fam47 | 1 | 6  | 47    | 4  | 4 |                                                          |
| Fam48 | 1 | 4  | 48    | 1  | 1 |                                                          |
| Fam49 | 1 | 10 | 49    | 1  | 1 |                                                          |

Table S5. Comparison of HapMap3 pairwise relationships. Each pair of individuals that is predicted to be related in at least one possible pedigree is represented in this table. The table lists the reported relationships from HapMap3, Pemberton et al.<sup>6</sup>, Kyriazopoulou-Panagiotopoulou et al.<sup>1</sup> (CARROT), and PRIMUS. The relationships in the PRIMUS column are the aggregate of all relationships from the possible pedigrees, and they are listed as what their relationship is to the other person on the same line. For example, the first row shows that NA19916 is the parent (P) of NA19918, and NA19918 is the offspring (O) of NA19916.

| Population | Network | IID1    | Sex | Hapmap Reported | PRIMUS Predicted                | Pemberton Predicted | CARROT Predicted | IID2    | Sex | Hapmap Reported | PRIMUS Predicted                | Pemberton Predicted | CARROT Predicted | Notes |
|------------|---------|---------|-----|-----------------|---------------------------------|---------------------|------------------|---------|-----|-----------------|---------------------------------|---------------------|------------------|-------|
| ASW        | 1       | NA19916 | M   | P               | P                               | O,P                 | -                | NA19918 | M   | O               | O                               | O,P                 | -                |       |
| ASW        | 1       | NA19917 | F   | P               | P                               | O,P                 | -                | NA19918 | M   | O               | O                               | O,P                 | -                |       |
| ASW        | 2       | NA19834 | M   | P               | P                               | O,P                 | -                | NA19836 | F   | O               | O                               | O,P                 | -                |       |
| ASW        | 2       | NA19835 | F   | P               | P                               | O,P                 | -                | NA19836 | F   | O               | O                               | O,P                 | -                |       |
| ASW        | 3       | NA20279 | M   | -               | O                               | O,P                 | -                | NA20282 | F   | -               | P                               | O,P                 | -                |       |
| ASW        | 3       | NA20279 | M   | -               | H                               | H                   | -                | NA20284 | M   | -               | H                               | H                   | -                | R*    |
| ASW        | 3       | NA20279 | M   | -               | N                               | N                   | -                | NA20301 | F   | -               | A                               | A                   | -                | R     |
| ASW        | 3       | NA20279 | M   | -               | 1C                              | -                   | 1C               | NA20302 | M   | -               | 1C                              | -                   | 1C               |       |
| ASW        | 3       | NA20282 | F   | P               | P                               | O,P                 | -                | NA20284 | M   | O               | O                               | O,P                 | -                |       |
| ASW        | 3       | NA20282 | F   | -               | F                               | F                   | -                | NA20301 | F   | -               | F                               | F                   | -                |       |
| ASW        | 3       | NA20282 | F   | -               | A                               | A                   | -                | NA20302 | M   | -               | N                               | N                   | -                | R*    |
| ASW        | 3       | NA20284 | M   | -               | N                               | N                   | -                | NA20301 | F   | -               | A                               | A                   | -                | R     |
| ASW        | 3       | NA20284 | M   | -               | 1C                              | -                   | 1C               | NA20302 | M   | -               | 1C                              | -                   | 1C               |       |
| ASW        | 3       | NA20301 | F   | P               | P                               | O,P                 | -                | NA20302 | M   | O               | O                               | O,P                 | -                |       |
| ASW        | 4       | NA19703 | M   | P               | P                               | O,P                 | -                | NA19705 | M   | O               | O                               | O,P                 | -                |       |
| ASW        | 4       | NA19704 | F   | P               | P                               | O,P                 | -                | NA19705 | M   | O               | O                               | O,P                 | -                |       |
| ASW        | 6       | NA19900 | M   | P               | P                               | O,P                 | -                | NA19902 | F   | O               | O                               | O,P                 | -                |       |
| ASW        | 6       | NA19901 | F   | P               | P                               | O,P                 | -                | NA19902 | F   | O               | O                               | O,P                 | -                |       |
| ASW        | 9       | NA20287 | F   | P               | O,P                             | O,P                 | -                | NA20288 | M   | O               | O,P                             | O,P                 | -                |       |
| ASW        | 14      | NA19713 | F   | -               | A                               | A                   | -                | NA19714 | F   | -               | N                               | N                   | -                | R     |
| ASW        | 14      | NA19713 | F   | P               | P                               | O,P                 | -                | NA19983 | F   | O               | O                               | O,P                 | -                |       |
| ASW        | 14      | NA19713 | F   | -               | F                               | F                   | -                | NA19985 | F   | -               | F                               | F                   | -                | R     |
| ASW        | 14      | NA19714 | F   | -               | 1C                              | -                   | 1C               | NA19983 | F   | -               | 1C                              | -                   | 1C               |       |
| ASW        | 14      | NA19714 | F   | O               | O                               | O,P                 | -                | NA19985 | F   | P               | P                               | O,P                 | -                |       |
| ASW        | 14      | NA19982 | M   | P               | P                               | O,P                 | -                | NA19983 | F   | O               | O                               | O,P                 | -                |       |
| ASW        | 14      | NA19983 | F   | -               | N                               | N                   | -                | NA19985 | F   | -               | A                               | A                   | -                | R*    |
| ASW        | 15      | NA20340 | M   | -               | 1C,GA,GC<br>,GG,GN,H<br>A,HN,UN | -                   | U                | NA20344 | F   | -               | 1C,GA,GC<br>,GG,GN,H<br>A,HN,UN | -                   | U                |       |
| ASW        | 15      | NA20340 | M   | -               | 1C,GA,GC<br>,GG,GN,H<br>A,HN,UN | -                   | -                | NA20349 | M   | -               | 1C,GA,GC<br>,GG,GN,H<br>A,HN,UN | -                   | -                | N     |
| ASW        | 15      | NA20344 | F   | P               | P                               | O,P                 | -                | NA20345 | M   | O               | O                               | O,P                 | -                |       |
| ASW        | 15      | NA20344 | F   | -               | F                               | F                   | -                | NA20349 | M   | -               | F                               | F                   | -                |       |
| ASW        | 15      | NA20344 | F   | -               | A                               | A                   | -                | NA20350 | M   | -               | N                               | N                   | -                | R     |
| ASW        | 15      | NA20345 | M   | -               | N                               | N                   | -                | NA20349 | M   | -               | A                               | A                   | -                | R*    |
| ASW        | 15      | NA20345 | M   | -               | 1C                              | -                   | 1C               | NA20350 | M   | -               | 1C                              | -                   | 1C               |       |
| ASW        | 15      | NA20349 | M   | P               | P                               | O,P                 | -                | NA20350 | M   | O               | O                               | O,P                 | -                |       |

|     |    |         |   |   |                                           |     |    |         |   |   |                                           |     |    |     |
|-----|----|---------|---|---|-------------------------------------------|-----|----|---------|---|---|-------------------------------------------|-----|----|-----|
| ASW | 16 | NA20281 | M | - | 1C,GA,GC<br>,GG,GN,H<br>A,HN,UN           | -   | -  | NA20297 | M | - | 1C,GA,GC<br>,GG,GN,H<br>A,HN,UN           | -   | -  | N   |
| ASW | 17 | NA19908 | M | P | P                                         | O,P | -  | NA19919 | M | O | O                                         | O,P | -  |     |
| ASW | 17 | NA19909 | F | P | P                                         | O,P | -  | NA19919 | M | O | O                                         | O,P | -  |     |
| ASW | 20 | NA19818 | M | P | P                                         | O,P | -  | NA19828 | M | O | O                                         | O,P | -  |     |
| ASW | 20 | NA19819 | F | P | P                                         | O,P | -  | NA19828 | M | O | O                                         | O,P | -  |     |
| ASW | 29 | NA20294 | F | P | O,P                                       | O,P | -  | NA20295 | M | O | O,P                                       | O,P | -  |     |
| ASW | 30 | NA20334 | F | P | P                                         | O,P | -  | NA20335 | M | O | O                                         | O,P | -  |     |
| ASW | 30 | NA20334 | F | - | F                                         | F   | -  | NA20336 | F | - | F                                         | F   | -  | R   |
| ASW | 30 | NA20334 | F | - | A                                         | A   | -  | NA20337 | F | - | N                                         | N   | -  | R   |
| ASW | 30 | NA20335 | M | - | N                                         | N   | -  | NA20336 | F | - | A                                         | A   | -  | R   |
| ASW | 30 | NA20335 | M | - | 1C                                        | -   | 1C | NA20337 | F | - | 1C                                        | -   | 1C |     |
| ASW | 30 | NA20336 | F | P | P                                         | O,P | -  | NA20337 | F | O | O                                         | O,P | -  |     |
| ASW | 44 | NA19700 | M | P | P                                         | O,P | -  | NA19702 | M | O | O                                         | O,P | -  |     |
| ASW | 44 | NA19701 | F | P | P                                         | O,P | -  | NA19702 | M | O | O                                         | O,P | -  |     |
| ASW | 46 | NA20289 | F | P | P                                         | O,P | -  | NA20290 | F | O | O                                         | O,P | -  |     |
| ASW | 46 | NA20289 | F | - | F                                         | F   | -  | NA20341 | F | - | F                                         | F   | -  | R   |
| ASW | 46 | NA20290 | F | - | 1C,GC,GG<br>,GN,HN,U<br>N                 | -   | U  | NA20333 | F | - | 1C,GA,GC<br>,GG,HA,U<br>N                 | -   | U  | P   |
| ASW | 46 | NA20290 | F | - | N                                         | N   | -  | NA20341 | F | - | A                                         | A   | -  | R   |
| ASW | 46 | NA20332 | F | P | O,P                                       | O,P | -  | NA20333 | F | O | O,P                                       | O,P | -  |     |
| ASW | 46 | NA20332 | F | - | A,G,H                                     | U   | -  | NA20343 | M | - | C,H,N                                     | U   | -  | R,P |
| ASW | 46 | NA20332 | F | - | 1C,UN                                     | -   | -  | NA20346 | M | - | 1C,UN                                     | -   | -  | N   |
| ASW | 46 | NA20333 | F | - | 1C,GC,HA<br>,HN                           | -   | U  | NA20343 | M | - | 1C,GC,HA<br>,HN                           | -   | U  | P   |
| ASW | 46 | NA20342 | M | P | P                                         | O,P | -  | NA20343 | M | O | O                                         | O,P | -  |     |
| ASW | 46 | NA20343 | M | - | 1C,GC,GG<br>,GN,HN,U<br>N                 | -   | U  | NA20346 | M | - | 1C,GA,GC<br>,GG,HA,U<br>N                 | -   | U  | P   |
| ASW | 46 | NA20346 | M | P | P                                         | O,P | -  | NA20347 | M | O | O                                         | O,P | -  |     |
| ASW | 46 | NA20347 | M | - | 1C,GC,GN<br>,HA,HN,U<br>N                 | -   | -  | NA20359 | F | - | 1C,GA,GC<br>,HA,HN,U<br>N                 | -   | -  | N   |
| ASW | 46 | NA20347 | M | - | 1C,GC,GG<br>,GN,HA,H<br>N,UN              | -   | -  | NA20360 | M | - | 1C,GA,GC<br>,GG,HA,H<br>N,UN              | -   | -  | N   |
| ASW | 46 | NA20347 | M | - | C,H,N                                     | H   | -  | NA20363 | F | - | A,G,H                                     | H   | -  | R,? |
| ASW | 46 | NA20347 | M | - | 1C,GC,HA<br>,HN                           | -   | HA | NA20364 | F | - | 1C,GC,HA<br>,HN                           | -   | HN | ?   |
| ASW | 46 | NA20359 | F | P | O,P                                       | O,P | -  | NA20360 | M | O | O,P                                       | O,P | -  |     |
| ASW | 46 | NA20359 | F | - | A,C,G,H,N<br>1C,GA,GC<br>,GG,HA,H<br>N,UN | A   | -  | NA20363 | F | - | A,C,G,H,N<br>1C,GC,GG<br>,GN,HA,H<br>N,UN | N   | -  | R,? |
| ASW | 46 | NA20359 | F | - | 1C,GC,GG<br>,GN,HA,H<br>N,UN              | -   | GA | NA20364 | F | - | 1C,GA,GC<br>,GG,HA,H<br>N,UN              | -   | GN | ?   |
| ASW | 46 | NA20360 | M | - | N,UN                                      | -   | 1C | NA20363 | F | - | N,UN                                      | -   | 1C | ?   |
| ASW | 46 | NA20363 | F | P | O,P                                       | O,P | -  | NA20364 | F | O | O,P                                       | O,P | -  |     |
| ASW | 48 | NA20356 | M | P | P                                         | O,P | -  | NA20358 | M | O | O                                         | O,P | -  |     |
| ASW | 48 | NA20357 | F | P | P                                         | O,P | -  | NA20358 | M | O | O                                         | O,P | -  |     |
| ASW | 49 | NA20291 | M | P | O,P                                       | O,P | -  | NA20292 | F | O | O,P                                       | O,P | -  |     |
| ASW | 62 | NA19921 | F | P | O,P                                       | O,P | -  | NA20129 | F | O | O,P                                       | O,P | -  |     |
| ASW | 65 | NA20317 | F | P | O,P                                       | O,P | -  | NA20319 | F | O | O,P                                       | O,P | -  |     |
| ASW | 71 | NA20126 | M | P | P                                         | O,P | -  | NA20128 | F | O | O                                         | O,P | -  |     |
| ASW | 71 | NA20127 | F | P | P                                         | O,P | -  | NA20128 | F | O | O                                         | O,P | -  |     |

|     |    |         |   |   |     |     |   |         |   |   |     |     |   |
|-----|----|---------|---|---|-----|-----|---|---------|---|---|-----|-----|---|
| ASW | 74 | NA19914 | F | P | O,P | O,P | - | NA19915 | M | O | O,P | O,P | - |
| ASW | 80 | NA20276 | F | P | O,P | O,P | - | NA20277 | F | O | O,P | O,P | - |
| CEU | 1  | NA10865 | M | O | O   | O,P | - | NA11891 | M | P | P   | O,P | - |
| CEU | 1  | NA10865 | M | O | O   | O,P | - | NA11892 | F | P | P   | O,P | - |
| CEU | 8  | NA10836 | F | O | O,P | O,P | - | NA12275 | F | P | O,P | O,P | - |
| CEU | 12 | NA10852 | F | O | O,P | O,P | - | NA12045 | M | P | O,P | O,P | - |
| CEU | 22 | NA10837 | M | O | O   | O,P | - | NA12272 | M | P | P   | O,P | - |
| CEU | 22 | NA10837 | M | O | O   | O,P | - | NA12273 | F | P | P   | O,P | - |
| CEU | 26 | NA12766 | M | O | O   | O,P | - | NA12775 | M | P | P   | O,P | - |
| CEU | 26 | NA12766 | M | O | O   | O,P | - | NA12776 | F | P | P   | O,P | - |
| CEU | 27 | NA12344 | M | O | O   | O,P | - | NA12347 | M | P | P   | O,P | - |
| CEU | 27 | NA12344 | M | O | O   | O,P | - | NA12348 | F | P | P   | O,P | - |
| CEU | 28 | NA12817 | M | O | O   | O,P | - | NA12827 | M | P | P   | O,P | - |
| CEU | 28 | NA12817 | M | O | O   | O,P | - | NA12828 | F | P | P   | O,P | - |
| CEU | 29 | NA10840 | F | O | O   | O,P | - | NA12286 | M | P | P   | O,P | - |
| CEU | 29 | NA10840 | F | O | O   | O,P | - | NA12287 | F | P | P   | O,P | - |
| CEU | 32 | NA12708 | F | O | O,P | O,P | - | NA12718 | F | P | O,P | O,P | - |
| CEU | 37 | NA06995 | M | O | O   | O,P | - | NA07037 | F | P | P   | O,P | - |
| CEU | 37 | NA06995 | M | O | O   | O,P | - | NA07435 | M | P | P   | O,P | - |
| CEU | 44 | NA12375 | M | O | O,P | O,P | - | NA12383 | F | P | O,P | O,P | - |
| CEU | 46 | NA12335 | M | O | O   | O,P | - | NA12340 | M | P | P   | O,P | - |
| CEU | 46 | NA12335 | M | O | O   | O,P | - | NA12341 | F | P | P   | O,P | - |
| CEU | 47 | NA12767 | F | O | O   | O,P | - | NA12777 | M | P | P   | O,P | - |
| CEU | 47 | NA12767 | F | O | O   | O,P | - | NA12778 | F | P | P   | O,P | - |
| CEU | 50 | NA12877 | M | O | O   | O,P | - | NA12889 | M | P | P   | O,P | - |
| CEU | 50 | NA12877 | M | O | O   | O,P | - | NA12890 | F | P | P   | O,P | - |
| CEU | 52 | NA07346 | F | P | P   | O,P | - | NA07349 | M | O | O   | O,P | - |
| CEU | 52 | NA07347 | M | P | P   | O,P | - | NA07349 | M | O | O   | O,P | - |
| CEU | 54 | NA12739 | M | O | O   | O,P | - | NA12748 | M | P | P   | O,P | - |
| CEU | 54 | NA12739 | M | O | O   | O,P | - | NA12749 | F | P | P   | O,P | - |
| CEU | 55 | NA10864 | F | O | O   | O,P | - | NA11893 | M | P | P   | O,P | - |
| CEU | 55 | NA10864 | F | O | O   | O,P | - | NA11894 | F | P | P   | O,P | - |
| CEU | 59 | NA10853 | M | O | O,P | O,P | - | NA11843 | M | P | O,P | O,P | - |
| CEU | 61 | NA12818 | F | O | O   | O,P | - | NA12829 | M | P | P   | O,P | - |
| CEU | 61 | NA12818 | F | O | O   | O,P | - | NA12830 | F | P | P   | O,P | - |
| CEU | 65 | NA10843 | F | O | O   | O,P | - | NA11919 | M | P | P   | O,P | - |
| CEU | 65 | NA10843 | F | O | O   | O,P | - | NA11920 | F | P | P   | O,P | - |
| CEU | 66 | NA12376 | F | O | O   | O,P | - | NA12489 | F | P | P   | O,P | - |
| CEU | 66 | NA12376 | F | O | O   | O,P | - | NA12546 | M | P | P   | O,P | - |
| CEU | 70 | NA12832 | F | O | O   | O,P | - | NA12842 | M | P | P   | O,P | - |
| CEU | 70 | NA12832 | F | O | O   | O,P | - | NA12843 | F | P | P   | O,P | - |
| CEU | 74 | NA07014 | F | O | O   | O,P | - | NA07031 | F | P | P   | O,P | - |
| CEU | 74 | NA07014 | F | O | O   | O,P | - | NA07051 | M | P | P   | O,P | - |
| CEU | 77 | NA12386 | F | O | O   | O,P | - | NA12399 | M | P | P   | O,P | - |
| CEU | 77 | NA12386 | F | O | O   | O,P | - | NA12400 | F | P | P   | O,P | - |

|     |     |         |   |   |     |     |    |         |   |   |     |     |    |
|-----|-----|---------|---|---|-----|-----|----|---------|---|---|-----|-----|----|
| CEU | 80  | NA12336 | F | O | O   | O,P | -  | NA12342 | M | P | P   | O,P | -  |
| CEU | 80  | NA12336 | F | O | O   | O,P | -  | NA12343 | F | P | P   | O,P | -  |
| CEU | 82  | NA10845 | M | O | O   | O,P | -  | NA11930 | M | P | P   | O,P | -  |
| CEU | 82  | NA10845 | M | O | O   | O,P | -  | NA11931 | F | P | P   | O,P | -  |
| CEU | 86  | NA10847 | F | O | O   | O,P | -  | NA12146 | M | P | P   | O,P | -  |
| CEU | 86  | NA10847 | F | O | O   | O,P | -  | NA12239 | F | P | P   | O,P | -  |
| CEU | 87  | NA10859 | F | O | O   | O,P | -  | NA11881 | M | P | P   | O,P | -  |
| CEU | 87  | NA10859 | F | O | O   | O,P | -  | NA11882 | F | P | P   | O,P | -  |
| CEU | 89  | NA12707 | M | O | O,P | O,P | -  | NA12716 | M | P | O,P | O,P | -  |
| CEU | 90  | NA10830 | M | O | O,P | O,P | -  | NA12154 | M | P | O,P | O,P | -  |
| CEU | 91  | NA12753 | F | O | O   | O,P | -  | NA12762 | M | P | P   | O,P | -  |
| CEU | 91  | NA12753 | F | O | O   | O,P | -  | NA12763 | F | P | P   | O,P | -  |
| CEU | 94  | NA12865 | F | O | O   | O,P | -  | NA12874 | M | P | P   | O,P | -  |
| CEU | 94  | NA12865 | F | O | O   | O,P | -  | NA12875 | F | P | P   | O,P | -  |
| CEU | 96  | NA10831 | F | O | O   | O,P | -  | NA12155 | M | P | P   | O,P | -  |
| CEU | 96  | NA10831 | F | O | O   | O,P | -  | NA12156 | F | P | P   | O,P | -  |
| CEU | 106 | NA12752 | M | O | O   | O,P | -  | NA12760 | M | P | P   | O,P | -  |
| CEU | 106 | NA12752 | M | O | O   | O,P | -  | NA12761 | F | P | P   | O,P | -  |
| CEU | 107 | NA06985 | F | P | P   | O,P | -  | NA06991 | F | O | O   | O,P | -  |
| CEU | 107 | NA06991 | F | O | O   | O,P | -  | NA06993 | M | P | P   | O,P | -  |
| CEU | 108 | NA10838 | M | O | O,P | O,P | -  | NA12003 | M | P | O,P | O,P | -  |
| CEU | 111 | NA06986 | M | P | P   | O,P | -  | NA06997 | F | O | O   | O,P | -  |
| CEU | 111 | NA06997 | F | O | O   | O,P | -  | NA07045 | F | P | P   | O,P | -  |
| CEU | 111 | NA06997 | F | - | 1C  | -   | 1C | NA12801 | M | - | 1C  | -   | 1C |
| CEU | 111 | NA06997 | F | - | N   | N   | -  | NA12813 | F | - | A   | A   | -  |
| CEU | 111 | NA07045 | F | - | A   | A   | -  | NA12801 | M | - | N   | N   | -  |
| CEU | 111 | NA07045 | F | - | F   | F   | -  | NA12813 | F | - | F   | F   | -  |
| CEU | 111 | NA12801 | M | O | O   | O,P | -  | NA12812 | M | P | P   | O,P | -  |
| CEU | 111 | NA12801 | M | O | O   | O,P | -  | NA12813 | F | P | P   | O,P | -  |
| CEU | 115 | NA10863 | F | O | O   | O,P | -  | NA12234 | F | P | P   | O,P | -  |
| CEU | 115 | NA10863 | F | O | O   | O,P | -  | NA12264 | M | P | P   | O,P | -  |
| CEU | 117 | NA12802 | F | O | O   | O,P | -  | NA12814 | M | P | P   | O,P | -  |
| CEU | 117 | NA12802 | F | O | O   | O,P | -  | NA12815 | F | P | P   | O,P | -  |
| CEU | 122 | NA10846 | M | O | O   | O,P | -  | NA12144 | M | P | P   | O,P | -  |
| CEU | 122 | NA10846 | M | O | O   | O,P | -  | NA12145 | F | P | P   | O,P | -  |
| CEU | 127 | NA10854 | F | O | O   | O,P | -  | NA11839 | M | P | P   | O,P | -  |
| CEU | 127 | NA10854 | F | O | O   | O,P | -  | NA11840 | F | P | P   | O,P | -  |
| CEU | 131 | NA10855 | F | O | O   | O,P | -  | NA11831 | M | P | P   | O,P | -  |
| CEU | 131 | NA10855 | F | O | O   | O,P | -  | NA11832 | F | P | P   | O,P | -  |
| CEU | 132 | NA06994 | M | P | P   | O,P | -  | NA07029 | M | O | O   | O,P | -  |
| CEU | 132 | NA07000 | F | P | P   | O,P | -  | NA07029 | M | O | O   | O,P | -  |
| CEU | 137 | NA12740 | F | O | O   | O,P | -  | NA12750 | M | P | P   | O,P | -  |
| CEU | 137 | NA12740 | F | O | O   | O,P | -  | NA12751 | F | P | P   | O,P | -  |
| CEU | 139 | NA10839 | F | O | O   | O,P | -  | NA12005 | M | P | P   | O,P | -  |
| CEU | 139 | NA10839 | F | O | O   | O,P | -  | NA12006 | F | P | P   | O,P | -  |

R

R

|     |     |         |   |   |                                 |     |    |         |   |   |                                 |     |    |     |
|-----|-----|---------|---|---|---------------------------------|-----|----|---------|---|---|---------------------------------|-----|----|-----|
| CEU | 141 | NA07345 | F | P | P                               | O,P | -  | NA07348 | F | O | O                               | O,P | -  |     |
| CEU | 141 | NA07348 | F | O | O                               | O,P | -  | NA07357 | M | P | P                               | O,P | -  |     |
| CEU | 143 | NA12878 | F | O | O                               | O,P | -  | NA12891 | M | P | P                               | O,P | -  |     |
| CEU | 143 | NA12878 | F | O | O                               | O,P | -  | NA12892 | F | P | P                               | O,P | -  |     |
| CEU | 147 | NA12864 | M | O | O                               | O,P | -  | NA12872 | M | P | P                               | O,P | -  |     |
| CEU | 147 | NA12864 | M | O | O                               | O,P | -  | NA12873 | F | P | P                               | O,P | -  |     |
| CEU | 150 | NA10856 | M | O | O                               | O,P | -  | NA11829 | M | P | P                               | O,P | -  |     |
| CEU | 150 | NA10856 | M | O | O                               | O,P | -  | NA11830 | F | P | P                               | O,P | -  |     |
| CEU | 152 | NA10835 | M | O | O                               | O,P | -  | NA12248 | M | P | P                               | O,P | -  |     |
| CEU | 152 | NA10835 | M | O | O                               | O,P | -  | NA12249 | F | P | P                               | O,P | -  |     |
| CEU | 156 | NA10861 | F | O | O                               | O,P | -  | NA11994 | M | P | P                               | O,P | -  |     |
| CEU | 156 | NA10861 | F | O | O                               | O,P | -  | NA11995 | F | P | P                               | O,P | -  |     |
| CHD | 2   | NA17981 | F | - | F                               | F   | -  | NA17986 | M | - | F                               | F   | -  | R   |
| CHD | 16  | NA17980 | M | - | A,C,G,H,N                       | U   | -  | NA18150 | F | - | A,C,G,H,N                       | U   | -  | R   |
| GIH | 54  | NA20909 | M | - | O,P                             | U   | -  | NA20910 | F | - | O,P                             | U   | -  | R   |
| GIH | 61  | NA20882 | F | - | P                               | P   | -  | NA20900 | F | - | O                               | O   | -  | R   |
| GIH | 61  | NA20891 | M | - | P                               | P   | -  | NA20900 | F | - | O                               | O   | -  | R   |
| GIH | 61  | NA20891 | M | - | A,C,G,H,N                       | A   | -  | NA20907 | F | - | A,C,G,H,N                       | N   | -  | R,? |
| GIH | 61  | NA20900 | F | - | 1C,GC,GN<br>,HA,HN              | -   | -  | NA20907 | F | - | 1C,GA,GG<br>,HA,HN              | -   | -  | N   |
| GIH | 71  | NA20874 | F | - | F                               | F   | -  | NA20879 | F | - | F                               | F   | -  | R   |
| LWK | 3   | NA19027 | M | - | A,C,G,H,N                       | U   | -  | NA19311 | M | - | A,C,G,H,N                       | U   | -  | R   |
| LWK | 13  | NA19396 | F | - | F                               | F   | -  | NA19397 | M | - | F                               | F   | -  | R   |
| LWK | 22  | NA19380 | M | - | 1C,C,GA,<br>GC,GG,H<br>A,HN,N   | -   | -  | NA19381 | F | - | 1C,A,G,G<br>C,GG,GN,<br>HA,HN   | -   | -  | N   |
| LWK | 22  | NA19380 | M | - | A,C,G,H,N                       | H   | -  | NA19382 | M | - | A,C,G,H,N                       | H   | -  | R,? |
| LWK | 22  | NA19381 | F | - | O,P                             | U   | -  | NA19382 | M | - | O,P                             | U   | -  | R   |
| LWK | 38  | NA19347 | M | - | F                               | F   | -  | NA19352 | M | - | F                               | F   | -  | R   |
| LWK | 45  | NA19313 | F | - | A,C,G,H,N                       | U   | -  | NA19334 | M | - | A,C,G,H,N                       | U   | -  | R   |
| LWK | 60  | NA19443 | M | - | A                               | A   | -  | NA19469 | F | - | N                               | N   | -  | R   |
| LWK | 60  | NA19443 | M | - | F                               | F   | -  | NA19470 | F | - | F                               | F   | -  | R   |
| LWK | 60  | NA19469 | F | - | O                               | O   | -  | NA19470 | F | - | P                               | P   | -  | R   |
| LWK | 69  | NA19434 | F | - | F                               | F   | -  | NA19444 | M | - | F                               | F   | -  | R   |
| LWK | 71  | NA19451 | M | - | 1C,GA,GC<br>,GG,GN,H<br>A,HN,UN | -   | -  | NA19452 | M | - | 1C,GA,GC<br>,GG,GN,H<br>A,HN,UN | -   | -  | N   |
| LWK | 80  | NA19373 | M | - | F                               | F   | -  | NA19374 | M | - | F                               | F   | -  | R   |
| LWK | 82  | NA19309 | M | - | 1C,GA,GC<br>,GG,GN,H<br>A,HN,UN | -   | -  | NA19359 | M | - | 1C,GA,GC<br>,GG,GN,H<br>A,HN,UN | -   | -  | N   |
| MEX | 0   | NA19660 | F | P | P                               | O,P | -  | NA19662 | F | O | O                               | O,P | -  |     |
| MEX | 0   | NA19660 | F | - | A,C,G,H,N                       | A   | -  | NA19664 | M | - | A,C,G,H,N                       | N   | -  | R,? |
| MEX | 0   | NA19660 | F | - | 1C,GA,GG<br>,HA,HN              | -   | GA | NA19665 | F | - | 1C,GC,GN<br>,HA,HN              | -   | GN | ?   |
| MEX | 0   | NA19660 | F | - | P                               | P   | -  | NA19685 | M | - | O                               | O   | -  | R   |
| MEX | 0   | NA19660 | F | - | G                               | G   | -  | NA19686 | F | - | C                               | C   | -  | R   |
| MEX | 0   | NA19661 | M | P | P                               | O,P | -  | NA19662 | F | O | O                               | O,P | -  |     |
| MEX | 0   | NA19661 | M | - | P                               | P   | -  | NA19685 | M | - | O                               | O   | -  | R   |
| MEX | 0   | NA19661 | M | - | G                               | G   | -  | NA19686 | F | - | C                               | C   | -  | R   |



|     |    |         |   |   |                    |     |    |         |   |   |                    |     |    |    |
|-----|----|---------|---|---|--------------------|-----|----|---------|---|---|--------------------|-----|----|----|
| MEX | 0  | NA19662 | F | - | 1C,GC,GN<br>,HA,HN | -   | 1C | NA19664 | M | - | 1C,GA,GG<br>,HA,HN | -   | 1C | ?  |
| MEX | 0  | NA19662 | F | - | F                  | F   | -  | NA19685 | M | - | F                  | F   | -  | R  |
| MEX | 0  | NA19662 | F | - | A                  | A   | -  | NA19686 | F | - | N                  | N   | -  | R  |
| MEX | 0  | NA19663 | F | P | P                  | O,P | -  | NA19665 | F | O | O                  | O,P | -  |    |
| MEX | 0  | NA19664 | M | P | P                  | O,P | -  | NA19665 | F | O | O                  | O,P | -  |    |
| MEX | 0  | NA19664 | M | - | 1C,GA,GG<br>,HA,HN | -   | 1C | NA19685 | M | - | 1C,GC,GN<br>,HA,HN | -   | 1C | ?  |
| MEX | 0  | NA19684 | F | P | P                  | O,P | -  | NA19686 | F | O | O                  | O,P | -  |    |
| MEX | 0  | NA19685 | M | P | P                  | O,P | -  | NA19686 | F | O | O                  | O,P | -  |    |
| MEX | 4  | NA19722 | F | P | P                  | O,P | -  | NA19724 | M | O | O                  | O,P | -  |    |
| MEX | 4  | NA19723 | M | P | P                  | O,P | -  | NA19724 | M | O | O                  | O,P | -  |    |
| MEX | 5  | NA19649 | M | P | O,P                | O,P | -  | NA19650 | M | O | O,P                | O,P | -  |    |
| MEX | 6  | NA19669 | F | P | P                  | O,P | -  | NA19671 | F | O | O                  | O,P | -  |    |
| MEX | 6  | NA19670 | M | P | P                  | O,P | -  | NA19671 | F | O | O                  | O,P | -  |    |
| MEX | 9  | NA19657 | F | P | P                  | O,P | -  | NA19659 | F | O | O                  | O,P | -  |    |
| MEX | 9  | NA19658 | M | P | P                  | O,P | -  | NA19659 | F | O | O                  | O,P | -  |    |
| MEX | 11 | NA19719 | F | P | P                  | O,P | -  | NA19721 | F | O | O                  | O,P | -  |    |
| MEX | 11 | NA19720 | M | P | P                  | O,P | -  | NA19721 | F | O | O                  | O,P | -  |    |
| MEX | 16 | NA19759 | M | P | O,P                | O,P | -  | NA19760 | F | O | O,P                | O,P | -  |    |
| MEX | 20 | NA19675 | F | P | P                  | O,P | -  | NA19677 | F | O | O                  | O,P | -  |    |
| MEX | 20 | NA19675 | F | - | O                  | O   | -  | NA19678 | F | - | P                  | P   | -  | R  |
| MEX | 20 | NA19675 | F | - | O                  | O   | -  | NA19679 | M | - | P                  | P   | -  | R  |
| MEX | 20 | NA19675 | F | - | F                  | F   | -  | NA19680 | F | - | F                  | F   | -  | R  |
| MEX | 20 | NA19676 | M | P | P                  | O,P | -  | NA19677 | F | O | O                  | O,P | -  |    |
| MEX | 20 | NA19677 | F | - | C                  | C   | -  | NA19678 | F | - | G                  | G   | -  | R* |
| MEX | 20 | NA19677 | F | - | C                  | C   | -  | NA19679 | M | - | G                  | G   | -  | R* |
| MEX | 20 | NA19677 | F | - | N                  | N   | -  | NA19680 | F | - | A                  | A   | -  | R  |
| MEX | 20 | NA19678 | F | P | P                  | O,P | -  | NA19680 | F | O | O                  | O,P | -  |    |
| MEX | 20 | NA19679 | M | P | P                  | O,P | -  | NA19680 | F | O | O                  | O,P | -  |    |
| MEX | 23 | NA19651 | F | P | P                  | O,P | -  | NA19653 | F | O | O                  | O,P | -  |    |
| MEX | 23 | NA19652 | M | P | P                  | O,P | -  | NA19653 | F | O | O                  | O,P | -  |    |
| MEX | 26 | NA19725 | F | P | P                  | O,P | -  | NA19727 | M | O | O                  | O,P | -  |    |
| MEX | 26 | NA19726 | M | P | P                  | O,P | -  | NA19727 | M | O | O                  | O,P | -  |    |
| MEX | 28 | NA19755 | F | P | P                  | O,P | -  | NA19757 | M | O | O                  | O,P | -  |    |
| MEX | 28 | NA19756 | M | P | P                  | O,P | -  | NA19757 | M | O | O                  | O,P | -  |    |
| MEX | 32 | NA19773 | F | P | P                  | O,P | -  | NA19775 | F | O | O                  | O,P | -  |    |
| MEX | 32 | NA19774 | M | P | P                  | O,P | -  | NA19775 | F | O | O                  | O,P | -  |    |
| MEX | 35 | NA19776 | F | P | P                  | O,P | -  | NA19778 | M | O | O                  | O,P | -  |    |
| MEX | 35 | NA19777 | M | P | P                  | O,P | -  | NA19778 | M | O | O                  | O,P | -  |    |
| MEX | 38 | NA19782 | F | P | P                  | O,P | -  | NA19784 | M | O | O                  | O,P | -  |    |
| MEX | 38 | NA19783 | M | P | P                  | O,P | -  | NA19784 | M | O | O                  | O,P | -  |    |
| MEX | 45 | NA19779 | F | P | P                  | O,P | -  | NA19781 | F | O | O                  | O,P | -  |    |
| MEX | 45 | NA19780 | M | P | P                  | O,P | -  | NA19781 | F | O | O                  | O,P | -  |    |
| MEX | 54 | NA19681 | F | P | P                  | O,P | -  | NA19683 | F | O | O                  | O,P | -  |    |
| MEX | 54 | NA19682 | M | P | P                  | O,P | -  | NA19683 | F | O | O                  | O,P | -  |    |

|     |    |         |   |   |                |     |   |         |   |   |                |     |   |     |
|-----|----|---------|---|---|----------------|-----|---|---------|---|---|----------------|-----|---|-----|
| MEX | 55 | NA19746 | F | P | P              | O,P | - | NA19748 | F | O | O              | O,P | - |     |
| MEX | 55 | NA19747 | M | P | P              | O,P | - | NA19748 | F | O | O              | O,P | - |     |
| MEX | 59 | NA19716 | F | P | O,P            | O,P | - | NA19718 | F | O | O,P            | O,P | - |     |
| MEX | 61 | NA19794 | F | P | P              | O,P | - | NA19796 | M | O | O              | O,P | - |     |
| MEX | 61 | NA19795 | M | P | P              | O,P | - | NA19796 | M | O | O              | O,P | - |     |
| MEX | 63 | NA19654 | F | P | O,P            | O,P | - | NA19656 | F | O | O,P            | O,P | - |     |
| MEX | 64 | NA19749 | F | P | P              | O,P | - | NA19751 | M | O | O              | O,P | - |     |
| MEX | 64 | NA19750 | M | P | P              | O,P | - | NA19751 | M | O | O              | O,P | - |     |
| MEX | 67 | NA19761 | F | P | P              | O,P | - | NA19763 | F | O | O              | O,P | - |     |
| MEX | 67 | NA19762 | M | P | P              | O,P | - | NA19763 | F | O | O              | O,P | - |     |
| MEX | 69 | NA19770 | F | P | P              | O,P | - | NA19772 | M | O | O              | O,P | - |     |
| MEX | 69 | NA19771 | M | P | P              | O,P | - | NA19772 | M | O | O              | O,P | - |     |
| MEX | 73 | NA19788 | F | P | P              | O,P | - | NA19790 | F | O | O              | O,P | - |     |
| MEX | 73 | NA19789 | M | P | P              | O,P | - | NA19790 | F | O | O              | O,P | - |     |
| MKK | 8  | NA21399 | M | P | P              | O,P | - | NA21401 | M | O | O              | O,P | - |     |
| MKK | 8  | NA21399 | M | - | F              | F   | - | NA21402 | M | - | F              | F   | - | R   |
| MKK | 8  | NA21399 | M | - | A              | A   | - | NA21404 | F | - | N              | N   | - | R*  |
| MKK | 8  | NA21399 | M | - | F              | F   | - | NA21405 | M | - | F              | F   | - | R   |
| MKK | 8  | NA21400 | F | P | P              | O,P | - | NA21401 | M | O | O              | O,P | - |     |
| MKK | 8  | NA21401 | M | - | N              | N   | - | NA21402 | M | - | A              | A   | - | R*  |
| MKK | 8  | NA21401 | M | - | 1C             | -   | - | NA21404 | F | - | 1C             | -   | - | N   |
| MKK | 8  | NA21401 | M | - | N              | N   | - | NA21405 | M | - | A              | A   | - | R   |
| MKK | 8  | NA21402 | M | P | P              | O,P | - | NA21404 | F | O | O              | O,P | - |     |
| MKK | 8  | NA21402 | M | - | F              | F   | - | NA21405 | M | - | F              | F   | - | R   |
| MKK | 8  | NA21403 | F | P | P              | O,P | - | NA21404 | F | O | O              | O,P | - |     |
| MKK | 8  | NA21404 | F | - | N              | N   | - | NA21405 | M | - | A              | A   | - | R*  |
| MKK | 16 | NA21716 | M | P | P              | O,P | - | NA21718 | M | O | O              | O,P | - |     |
| MKK | 16 | NA21716 | M | - | A,C,G,H,N      | A   | - | NA21741 | M | - | A,C,G,H,N      | N   | - | R,? |
| MKK | 16 | NA21717 | F | P | P              | O,P | - | NA21718 | M | O | O              | O,P | - |     |
| MKK | 16 | NA21718 | M | - | 1C,GC,GN,HA,HN | -   | - | NA21741 | M | - | 1C,GA,GG,HA,HN | -   | - | N   |
| MKK | 25 | NA21723 | F | - | A,C,G,H,N      | H   | - | NA21733 | F | - | A,C,G,H,N      | H   | - | R,? |
| MKK | 26 | NA21307 | M | P | P              | O,P | - | NA21309 | F | O | O              | O,P | - |     |
| MKK | 26 | NA21307 | M | - | A,C,G,H,N      | A   | - | NA21616 | M | - | A,C,G,H,N      | N   | - | R,? |
| MKK | 26 | NA21308 | F | P | P              | O,P | - | NA21309 | F | O | O              | O,P | - |     |
| MKK | 26 | NA21308 | F | - | A,C,G,H,N      | A   | - | NA21379 | F | - | A,C,G,H,N      | N   | - | R,? |
| MKK | 26 | NA21308 | F | - | A,C,G,H,N      | H   | - | NA21517 | F | - | A,C,G,H,N      | H   | - | R,? |
| MKK | 26 | NA21309 | F | - | 1C,GC,GN,HA,HN | -   | - | NA21379 | F | - | 1C,GA,GG,HA,HN | -   | - | N   |
| MKK | 26 | NA21309 | F | - | 1C,GC,GN,HA,HN | -   | - | NA21517 | F | - | 1C,GA,GG,HA,HN | -   | - | N   |
| MKK | 26 | NA21309 | F | - | 1C,GC,GN,HA,HN | -   | - | NA21616 | M | - | 1C,GA,GG,HA,HN | -   | - | N   |
| MKK | 26 | NA21379 | F | - | 1C,UN          | -   | - | NA21517 | F | - | 1C,UN          | -   | - | N   |
| MKK | 31 | NA21357 | F | - | F              | F   | - | NA21509 | M | - | F              | F   | - | R   |
| MKK | 40 | NA21381 | M | P | P              | O,P | - | NA21383 | M | O | O              | O,P | - |     |
| MKK | 40 | NA21382 | F | P | P              | O,P | - | NA21383 | M | O | O              | O,P | - |     |

|     |     |         |   |   |                                       |     |   |         |   |   |                                       |     |   |     |
|-----|-----|---------|---|---|---------------------------------------|-----|---|---------|---|---|---------------------------------------|-----|---|-----|
| MKK | 40  | NA21382 | F | - | 1C,GA,GG<br>,HA,HN                    | -   | - | NA21384 | M | - | 1C,GC,GN<br>,HA,HN                    | -   | - | N   |
| MKK | 40  | NA21382 | F | - | A,C,G,H,N                             | N   | - | NA21387 | M | - | A,C,G,H,N                             | A   | - | R,? |
| MKK | 40  | NA21382 | F | - | 1C,GA,GG<br>,HA,HN                    | -   | - | NA21389 | M | - | 1C,GC,GN<br>,HA,HN                    | -   | - | N   |
| MKK | 40  | NA21383 | M | - | 1C,GC,GN<br>,HA,HN                    | -   | - | NA21387 | M | - | 1C,GA,GG<br>,HA,HN                    | -   | - | N   |
| MKK | 40  | NA21384 | M | P | P                                     | O,P | - | NA21386 | F | O | O                                     | O,P | - |     |
| MKK | 40  | NA21384 | M | - | O                                     | O   | - | NA21387 | M | - | P                                     | P   | - | R   |
| MKK | 40  | NA21384 | M | - | O                                     | O   | - | NA21388 | F | - | P                                     | P   | - | R   |
| MKK | 40  | NA21384 | M | - | F                                     | F   | - | NA21389 | M | - | F                                     | F   | - | R   |
| MKK | 40  | NA21385 | F | P | P                                     | O,P | - | NA21386 | F | O | O                                     | O,P | - |     |
| MKK | 40  | NA21386 | F | - | C                                     | C   | - | NA21387 | M | - | G                                     | G   | - | R   |
| MKK | 40  | NA21386 | F | - | C                                     | C   | - | NA21388 | F | - | G                                     | G   | - | R   |
| MKK | 40  | NA21386 | F | - | N                                     | N   | - | NA21389 | M | - | A                                     | A   | - | R*  |
| MKK | 40  | NA21387 | M | P | P                                     | O,P | - | NA21389 | M | O | O                                     | O,P | - |     |
| MKK | 40  | NA21388 | F | P | P                                     | O,P | - | NA21389 | M | O | O                                     | O,P | - |     |
| MKK | 43  | NA21521 | M | - | A,C,G,H,N                             | U   | - | NA21599 | M | - | A,C,G,H,N                             | U   | - | R   |
| MKK | 43  | NA21521 | M | - | 1C,GA,GG<br>,HA,HN                    | -   | - | NA21601 | F | - | 1C,GC,GN<br>,HA,HN                    | -   | - | N   |
| MKK | 43  | NA21599 | M | P | P                                     | O,P | - | NA21601 | F | O | O                                     | O,P | - |     |
| MKK | 43  | NA21600 | F | P | P                                     | O,P | - | NA21601 | F | O | O                                     | O,P | - |     |
| MKK | 57  | NA21620 | F | - | A,C,G,H,N                             | U   | - | NA21719 | M | - | A,C,G,H,N                             | U   | - | R   |
| MKK | 68  | NA21574 | F | - | O,P                                   | U   | - | NA21575 | M | - | O,P                                   | U   | - | R   |
| MKK | 101 | NA21457 | F | - | F                                     | F   | - | NA21683 | F | - | F                                     | F   | - | R   |
| MKK | 105 | NA21363 | F | - | O,P                                   | U   | - | NA21415 | F | - | O,P                                   | U   | - | R   |
| MKK | 114 | NA21440 | M | P | P                                     | O,P | - | NA21442 | M | O | O                                     | O,P | - |     |
| MKK | 114 | NA21441 | F | P | P                                     | O,P | - | NA21442 | M | O | O                                     | O,P | - |     |
| MKK | 115 | NA21359 | M | P | P                                     | O,P | - | NA21361 | F | O | O                                     | O,P | - |     |
| MKK | 115 | NA21360 | F | P | P                                     | O,P | - | NA21361 | F | O | O                                     | O,P | - |     |
| MKK | 119 | NA21391 | F | - | A,C,G,H,N                             | H   | - | NA21421 | F | - | A,C,G,H,N                             | H   | - | R,? |
| MKK | 119 | NA21391 | F | - | 1C,UN<br>1C,GA,GC<br>,GG,GN,H<br>A,HN | -   | - | NA21478 | M | - | 1C,UN<br>1C,GA,GC<br>,GG,GN,H<br>A,HN | -   | - | N   |
| MKK | 119 | NA21391 | F | - | 1C,GA,GC<br>,GG,GN,H<br>A,HN,UN       | -   | - | NA21485 | M | - | 1C,GA,GC<br>,GG,GN,H<br>A,HN,UN       | -   | - | N   |
| MKK | 119 | NA21421 | F | - | 1C,UN                                 | -   | - | NA21488 | M | - | 1C,UN                                 | -   | - | N   |
| MKK | 119 | NA21421 | F | - | A,C,G,H,N                             | U   | - | NA21485 | M | - | A,C,G,H,N                             | U   | - | R   |
| MKK | 119 | NA21421 | F | - | 1C,GA,GG<br>,HA,HN                    | -   | - | NA21487 | F | - | 1C,GC,GN<br>,HA,HN                    | -   | - | N   |
| MKK | 119 | NA21421 | F | - | 1C,UN                                 | -   | - | NA21488 | M | - | 1C,UN                                 | -   | - | N   |
| MKK | 119 | NA21475 | M | P | P                                     | O,P | - | NA21477 | M | O | O                                     | O,P | - |     |
| MKK | 119 | NA21475 | M | - | 1C,GC,GN<br>,HA,HN                    | -   | - | NA21478 | M | - | 1C,GA,GG<br>,HA,HN                    | -   | - | N   |
| MKK | 119 | NA21475 | M | - | 1C,GC,GN<br>,HA,HN                    | -   | - | NA21485 | M | - | 1C,GA,GG<br>,HA,HN                    | -   | - | N   |
| MKK | 119 | NA21475 | M | - | O                                     | O   | - | NA21488 | M | - | P                                     | P   | - | R   |
| MKK | 119 | NA21475 | M | - | O                                     | O   | - | NA21489 | F | - | P                                     | P   | - | R   |
| MKK | 119 | NA21475 | M | - | F                                     | F   | - | NA21490 | M | - | F                                     | F   | - | R   |
| MKK | 119 | NA21476 | F | P | P                                     | O,P | - | NA21477 | M | O | O                                     | O,P | - |     |

|     |     |         |   |   |                                 |     |   |         |   |   |                                 |     |   |      |
|-----|-----|---------|---|---|---------------------------------|-----|---|---------|---|---|---------------------------------|-----|---|------|
| MKK | 119 | NA21477 | M | - | C                               | C   | - | NA21488 | M | - | G                               | G   | - | R    |
| MKK | 119 | NA21477 | M | - | C                               | C   | - | NA21489 | F | - | G                               | G   | - | R    |
| MKK | 119 | NA21477 | M | - | N                               | N   | - | NA21490 | M | - | A                               | A   | - | R    |
| MKK | 119 | NA21478 | M | P | P                               | O,P | - | NA21480 | F | O | O                               | O,P | - |      |
| MKK | 119 | NA21478 | M | - | 1C,GA,GC<br>,GG,GN,H<br>A,HN,UN | -   | - | NA21485 | M | - | 1C,GA,GC<br>,GG,GN,H<br>A,HN,UN | -   | - | N    |
| MKK | 119 | NA21478 | M | - | GC,UN                           | -   | - | NA21487 | F | - | GG,UN                           | -   | - | N    |
| MKK | 119 | NA21478 | M | - | A,C,G,H,N                       | U   | - | NA21488 | M | - | A,C,G,H,N                       | U   | - | R    |
| MKK | 119 | NA21478 | M | - | 1C,GA,GG<br>,HA,HN              | -   | - | NA21490 | M | - | 1C,GC,GN<br>,HA,HN              | -   | - | N    |
| MKK | 119 | NA21479 | F | P | P                               | O,P | - | NA21480 | F | O | O                               | O,P | - |      |
| MKK | 119 | NA21479 | F | - | A,C,G,H,N                       | H   | - | NA21685 | M | - | A,C,G,H,N                       | H   | - | R,?  |
| MKK | 119 | NA21480 | F | - | 1C,GC,GN<br>,HA,HN              | -   | - | NA21488 | M | - | 1C,GA,GG<br>,HA,HN              | -   | - | N    |
| MKK | 119 | NA21480 | F | - | 1C,GC,GN<br>,HA,HN              | -   | - | NA21685 | M | - | 1C,GA,GG<br>,HA,HN              | -   | - | N    |
| MKK | 119 | NA21485 | M | P | P                               | O,P | - | NA21487 | F | O | O                               | O,P | - |      |
| MKK | 119 | NA21485 | M | - | A,C,G,H,N                       | U   | - | NA21488 | M | - | A,C,G,H,N                       | U   | - | R    |
| MKK | 119 | NA21485 | M | - | 1C,GA,GG<br>,HA,HN              | -   | - | NA21490 | M | - | 1C,GC,GN<br>,HA,HN              | -   | - | N    |
| MKK | 119 | NA21486 | F | P | P                               | O,P | - | NA21487 | F | O | O                               | O,P | - |      |
| MKK | 119 | NA21487 | F | - | 1C,GC,GN<br>,HA,HN              | -   | - | NA21488 | M | - | 1C,GA,GG<br>,HA,HN              | -   | - | N    |
| MKK | 119 | NA21488 | M | P | P                               | O,P | - | NA21490 | M | O | O                               | O,P | - |      |
| MKK | 119 | NA21489 | F | P | P                               | O,P | - | NA21490 | M | O | O                               | O,P | - |      |
| MKK | 125 | NA21352 | M | - | A,C,G,H,N                       | U   | - | NA21414 | M | - | A,C,G,H,N                       | U   | - | R    |
| MKK | 125 | NA21352 | M | - | 1C,GA,GG<br>,HA,HN              | -   | - | NA21527 | M | - | 1C,GC,GN<br>,HA,HN              | -   | - | N    |
| MKK | 125 | NA21352 | M | - | A,C,G,H,N                       | U   | - | NA21583 | M | - | A,C,G,H,N                       | U   | - | R    |
| MKK | 125 | NA21414 | M | - | 1C,UN                           | -   | - | NA21583 | M | - | 1C,UN                           | -   | - | N    |
| MKK | 125 | NA21526 | F | P | P                               | O,P | - | NA21527 | M | O | O                               | O,P | - |      |
| MKK | 125 | NA21527 | M | O | O                               | O,P | - | NA21583 | M | P | P                               | O,P | - |      |
| MKK | 131 | NA21300 | F | - | 1C,GA,GG<br>,HA,HN,U<br>N       | -   | - | NA21312 | M | - | 1C,GC,GN<br>,HA,HN,U<br>N       | -   | - | N    |
| MKK | 131 | NA21300 | F | - | 1C,GA,GG<br>,HA,HN,U<br>N       | -   | - | NA21370 | M | - | 1C,GC,GN<br>,HA,HN,U<br>N       | -   | - | N    |
| MKK | 131 | NA21300 | F | - | 1C,UN                           | -   | - | NA21435 | M | - | 1C,UN                           | -   | - | N    |
| MKK | 131 | NA21300 | F | - | A,G,H,N                         | G   | - | NA21520 | M | - | A,C,H,N                         | C   | - | R*,? |
| MKK | 131 | NA21300 | F | - | A,G,H,N                         | G   | - | NA21613 | F | - | A,C,H,N                         | C   | - | R,?  |
| MKK | 131 | NA21300 | F | - | A,C,G,H,N                       | H   | - | NA21617 | F | - | A,C,G,H,N                       | H   | - | R,?  |
| MKK | 131 | NA21300 | F | - | 1C,UN                           | -   | - | NA21647 | M | - | 1C,UN                           | -   | - | N    |
| MKK | 131 | NA21300 | F | - | 1C,UN                           | -   | - | NA21686 | F | - | 1C,UN                           | -   | - | N    |
| MKK | 131 | NA21300 | F | - | 1C,UN                           | -   | - | NA21825 | F | - | 1C,UN                           | -   | - | N    |
| MKK | 131 | NA21301 | M | P | P                               | O,P | - | NA21302 | F | O | O                               | O,P | - |      |
| MKK | 131 | NA21301 | M | - | F                               | F   | - | NA21344 | M | - | F                               | F   | - | R    |
| MKK | 131 | NA21301 | M | - | A                               | A   | - | NA21366 | M | - | N                               | N   | - | R*   |
| MKK | 131 | NA21302 | F | O | O                               | O,P | - | NA21303 | F | P | P                               | O,P | - |      |
| MKK | 131 | NA21302 | F | - | N                               | N   | - | NA21344 | M | - | A                               | A   | - | R*   |
| MKK | 131 | NA21302 | F | - | 1C                              | -   | - | NA21366 | M | - | 1C                              | -   | - | N    |
| MKK | 131 | NA21311 | M | - | G,H                             | H   | - | NA21312 | M | - | C,H                             | H   | - | R*,? |

|     |     |         |   |   |                                    |     |   |         |   |   |                                    |     |   |      |
|-----|-----|---------|---|---|------------------------------------|-----|---|---------|---|---|------------------------------------|-----|---|------|
| MKK | 131 | NA21311 | M | - | GG,HA                              | -   | - | NA21313 | M | - | GC,HN                              | -   | - | N    |
| MKK | 131 | NA21311 | M | - | O,P                                | O   | - | NA21314 | M | - | O,P                                | P   | - | R,?  |
| MKK | 131 | NA21311 | M | - | G,H                                | C   | - | NA21320 | F | - | C,H                                | G   | - | R,?  |
| MKK | 131 | NA21311 | M | - | 1C,GC,GG,<br>GN,HA,H<br>N,UN       | -   | - | NA21367 | M | - | 1C,GA,GC,<br>GG,HA,H<br>N,UN       | -   | - | N    |
| MKK | 131 | NA21311 | M | - | 1C,UN                              | -   | - | NA21424 | F | - | 1C,UN                              | -   | - | N    |
| MKK | 131 | NA21311 | M | - | 1C,UN                              | -   | - | NA21596 | M | - | 1C,UN                              | -   | - | N    |
| MKK | 131 | NA21312 | M | P | P                                  | O,P | - | NA21313 | M | O | O                                  | O,P | - |      |
| MKK | 131 | NA21312 | M | - | O                                  | O   | - | NA21314 | M | - | P                                  | P   | - | R    |
| MKK | 131 | NA21312 | M | - | G,H                                | C   | - | NA21320 | F | - | C,H                                | G   | - | R*,? |
| MKK | 131 | NA21312 | M | - | 1C,GC,GN,<br>HA,HN                 | -   | - | NA21367 | M | - | 1C,GA,GC,<br>HA,HN                 | -   | - | N    |
| MKK | 131 | NA21312 | M | - | H                                  | U   | - | NA21370 | M | - | H                                  | U   | - | R,P  |
| MKK | 131 | NA21312 | M | - | 1C,GA,GC,<br>GG,GN,H<br>A,HN,UN    | -   | - | NA21423 | M | - | 1C,GA,GC,<br>GG,GN,H<br>A,HN,UN    | -   | - | N    |
| MKK | 131 | NA21312 | M | - | 1C,UN                              | -   | - | NA21424 | F | - | 1C,UN                              | -   | - | N    |
| MKK | 131 | NA21312 | M | - | 1C,UN                              | -   | - | NA21447 | M | - | 1C,UN                              | -   | - | N    |
| MKK | 131 | NA21312 | M | - | 1C,GC,GN,<br>HA,HN,U<br>N          | -   | - | NA21520 | M | - | 1C,GA,GC,<br>HA,HN,U<br>N          | -   | - | N    |
| MKK | 131 | NA21312 | M | - | 1C,UN                              | -   | - | NA21596 | M | - | 1C,UN                              | -   | - | N    |
| MKK | 131 | NA21312 | M | - | 1C,GC,GN,<br>HA,HN,U<br>N          | -   | - | NA21613 | F | - | 1C,GA,GC,<br>HA,HN,U<br>N          | -   | - | N    |
| MKK | 131 | NA21312 | M | - | C,H,N                              | U   | - | NA21617 | F | - | A,G,H                              | U   | - | R,P  |
| MKK | 131 | NA21313 | M | - | C                                  | C   | - | NA21314 | M | - | G                                  | G   | - | R    |
| MKK | 131 | NA21313 | M | - | HA,HN                              | -   | - | NA21320 | F | - | HA,HN                              | -   | - | N    |
| MKK | 131 | NA21313 | M | O | O                                  | O,P | - | NA21362 | F | P | P                                  | O,P | - |      |
| MKK | 131 | NA21313 | M | - | HN                                 | -   | - | NA21370 | M | - | HA                                 | -   | - | N    |
| MKK | 131 | NA21313 | M | - | 1C,GC,GN,<br>HA,HN<br>GC,GN,H<br>N | -   | - | NA21438 | F | - | 1C,GA,GC,<br>HA,HN<br>GA,GC,H<br>A | -   | - | N    |
| MKK | 131 | NA21313 | M | - |                                    |     |   | NA21617 | F | - |                                    |     |   | N    |
| MKK | 131 | NA21314 | M | - | P                                  | O   | - | NA21320 | F | - | O                                  | P   | - | R    |
| MKK | 131 | NA21314 | M | - | A,C,G,H,N                          | H   | - | NA21367 | M | - | A,C,G,H,N                          | H   | - | R,?  |
| MKK | 131 | NA21314 | M | - | 1C,UN                              | -   | - | NA21378 | M | - | 1C,UN                              | -   | - | N    |
| MKK | 131 | NA21314 | M | - | 1C,GA,GC,<br>GG,GN,H<br>A,HN,UN    | -   | - | NA21423 | M | - | 1C,GA,GC,<br>GG,GN,H<br>A,HN,UN    | -   | - | N    |
| MKK | 131 | NA21314 | M | - | 1C,UN                              | -   | - | NA21424 | F | - | 1C,UN                              | -   | - | N    |
| MKK | 131 | NA21314 | M | - | GC,UN                              | -   | - | NA21425 | F | - | GG,UN                              | -   | - | N    |
| MKK | 131 | NA21314 | M | - | 1C,UN                              | -   | - | NA21447 | M | - | 1C,UN                              | -   | - | N    |
| MKK | 131 | NA21314 | M | - | 1C,UN                              | -   | - | NA21493 | F | - | 1C,UN                              | -   | - | N    |
| MKK | 131 | NA21314 | M | - | 1C,UN                              | -   | - | NA21596 | M | - | 1C,UN                              | -   | - | N    |
| MKK | 131 | NA21316 | M | P | P                                  | O,P | - | NA21317 | M | O | O                                  | O,P | - |      |
| MKK | 131 | NA21316 | M | - | F                                  | F   | - | NA21318 | M | - | F                                  | F   | - | R    |
| MKK | 131 | NA21316 | M | - | A,C,H,N                            | C   | - | NA21519 | M | - | A,G,H,N                            | G   | - | R,?  |
| MKK | 131 | NA21316 | M | - | 1C,UN                              | -   | - | NA21619 | M | - | 1C,UN                              | -   | - | N    |
| MKK | 131 | NA21316 | M | - | 1C,GA,GC,<br>GG,GN,H<br>A,HN,UN    | -   | - | NA21635 | F | - | 1C,GA,GC,<br>GG,GN,H<br>A,HN,UN    | -   | - | N    |
| MKK | 131 | NA21316 | M | - | 1C,GA,GC,<br>GG,GN,H<br>A,HN,UN    | -   | - | NA21678 | M | - | 1C,GA,GC,<br>GG,GN,H<br>A,HN,UN    | -   | - | N    |

|     |     |         |   |   |           |          |         |         |         |   |           |          |          |         |   |   |   |
|-----|-----|---------|---|---|-----------|----------|---------|---------|---------|---|-----------|----------|----------|---------|---|---|---|
| MKK | 131 | NA21317 | M | - | N         | N        | -       | NA21318 | M       | - | A         | A        | -        | R       |   |   |   |
| MKK | 131 | NA21317 | M | - | 1C,GC,GN  | ,HN      | -       | NA21519 | M       | - | 1C,GA,GG  | ,HA      | -        | N       |   |   |   |
| MKK | 131 | NA21317 | M | O | O         | O,P      | -       | NA21580 | F       | P | P         | O,P      | -        |         |   |   |   |
| MKK | 131 | NA21318 | M | - | A,C,H,N   | C        | -       | NA21519 | M       | - | A,G,H,N   | G        | -        | R,?     |   |   |   |
| MKK | 131 | NA21318 | M | - | 1C,UN     | -        | -       | NA21619 | M       | - | 1C,UN     | -        | -        | N       |   |   |   |
| MKK | 131 | NA21318 | M | - | 1C,GA,GC  | ,GG,GN,H | A,HN,UN | -       | NA21635 | F | -         | 1C,GA,GC | ,GG,GN,H | A,HN,UN | - | - | N |
| MKK | 131 | NA21318 | M | - | 1C,GA,GC  | ,GG,GN,H | A,HN,UN | -       | NA21678 | M | -         | 1C,GA,GC | ,GG,GN,H | A,HN,UN | - | - | N |
| MKK | 131 | NA21320 | F | - | H,N       | H        | -       | NA21365 | F       | - | A,H       | H        | -        | R,?     |   |   |   |
| MKK | 131 | NA21320 | F | - | 1C,HA     | -        | -       | NA21366 | M       | - | 1C,HN     | -        | -        | N       |   |   |   |
| MKK | 131 | NA21320 | F | - | 1C,GC,GN  | ,HA,HN   | -       | NA21367 | M       | - | 1C,GA,GG  | ,HA,HN   | -        | -       | N |   |   |
| MKK | 131 | NA21320 | F | - | 1C,GA,GC  | ,GG,GN,H | A,HN,UN | -       | NA21423 | M | -         | 1C,GA,GC | ,GG,GN,H | A,HN,UN | - | - | N |
| MKK | 131 | NA21320 | F | - | 1C,UN     | -        | -       | NA21424 | F       | - | 1C,UN     | -        | -        | N       |   |   |   |
| MKK | 131 | NA21320 | F | - | 1C,UN     | -        | -       | NA21447 | M       | - | 1C,UN     | -        | -        | N       |   |   |   |
| MKK | 131 | NA21320 | F | - | H,N       | H        | -       | NA21523 | M       | - | A,H       | H        | -        | R*,?    |   |   |   |
| MKK | 131 | NA21320 | F | - | 1C,HA     | -        | -       | NA21525 | M       | - | 1C,HN     | -        | -        | N       |   |   |   |
| MKK | 131 | NA21320 | F | - | 1C,UN     | -        | -       | NA21596 | M       | - | 1C,UN     | -        | -        | N       |   |   |   |
| MKK | 131 | NA21344 | M | P | P         | O,P      | -       | NA21366 | M       | O | O         | O,P      | -        |         |   |   |   |
| MKK | 131 | NA21362 | F | - | A,C,G,H,N | H        | -       | NA21438 | F       | - | A,C,G,H,N | H        | -        | R*,?    |   |   |   |
| MKK | 131 | NA21362 | F | - | 1C,GA,GG  | ,HA,HN   | -       | NA21439 | M       | - | 1C,GC,GN  | ,HA,HN   | -        | -       | N |   |   |
| MKK | 131 | NA21362 | F | - | 1C,GN,HA  | ,HN,UN   | -       | NA21528 | M       | - | 1C,GA,HA  | ,HN,UN   | -        | -       | N |   |   |
| MKK | 131 | NA21362 | F | - | 1C,GN,HA  | ,HN,UN   | -       | NA21587 | M       | - | 1C,GA,HA  | ,HN,UN   | -        | -       | N |   |   |
| MKK | 131 | NA21365 | F | P | P         | O,P      | -       | NA21366 | M       | O | O         | O,P      | -        |         |   |   |   |
| MKK | 131 | NA21365 | F | - | F         | F        | -       | NA21523 | M       | - | F         | F        | -        | R       |   |   |   |
| MKK | 131 | NA21365 | F | - | A         | A        | -       | NA21525 | M       | - | N         | N        | -        | R*      |   |   |   |
| MKK | 131 | NA21366 | M | - | N         | N        | -       | NA21523 | M       | - | A         | A        | -        | R       |   |   |   |
| MKK | 131 | NA21366 | M | - | 1C        | -        | -       | NA21525 | M       | - | 1C        | -        | -        | N       |   |   |   |
| MKK | 131 | NA21367 | M | - | 1C,GA,GN  | ,HA,HN,U | N       | -       | NA21378 | M | -         | 1C,GA,GN | ,HA,HN,U | N       | - | - | N |
| MKK | 131 | NA21367 | M | - | 1C,UN     | -        | -       | NA21423 | M       | - | 1C,UN     | -        | -        | N       |   |   |   |
| MKK | 131 | NA21367 | M | - | 1C,UN     | -        | -       | NA21424 | F       | - | 1C,UN     | -        | -        | N       |   |   |   |
| MKK | 131 | NA21367 | M | - | 1C,UN     | -        | -       | NA21447 | M       | - | 1C,UN     | -        | -        | N       |   |   |   |
| MKK | 131 | NA21367 | M | - | 1C,GA,GN  | ,HA,HN,U | N       | -       | NA21493 | F | -         | 1C,GA,GN | ,HA,HN,U | N       | - | - | N |
| MKK | 131 | NA21367 | M | - | 1C,GC,UN  | -        | -       | NA21596 | M       | - | 1C,GG,U   | N        | -        | -       | N |   |   |
| MKK | 131 | NA21370 | M | - | H         | H        | -       | NA21494 | F       | - | H         | H        | -        | R       |   |   |   |
| MKK | 131 | NA21370 | M | - | 1C,GC,GN  | ,HA,HN,U | N       | -       | NA21520 | M | -         | 1C,GA,GG | ,HA,HN,U | N       | - | - | N |
| MKK | 131 | NA21370 | M | - | O         | O        | -       | NA21522 | M       | - | P         | P        | -        | R       |   |   |   |
| MKK | 131 | NA21370 | M | - | 1C,GN,HA  | ,HN      | -       | NA21528 | M       | - | 1C,GA,HA  | ,HN      | -        | -       | N |   |   |
| MKK | 131 | NA21370 | M | - | 1C,GN,HA  | ,HN      | -       | NA21587 | M       | - | 1C,GA,HA  | ,HN      | -        | -       | N |   |   |
| MKK | 131 | NA21370 | M | - | 1C,GC,GN  | ,HA,HN,U | N       | -       | NA21613 | F | -         | 1C,GA,GG | ,HA,HN,U | N       | - | - | N |
| MKK | 131 | NA21370 | M | - | C,H,N     | U        | -       | NA21617 | F       | - | A,G,H     | U        | -        | R,P     |   |   |   |

|     |     |         |   |   |                                                                  |     |   |         |   |   |                                  |     |   |      |
|-----|-----|---------|---|---|------------------------------------------------------------------|-----|---|---------|---|---|----------------------------------|-----|---|------|
| MKK | 131 | NA21370 | M | - | C,H                                                              | H   | - | NA21682 | M | - | G,H                              | H   | - | R,?  |
| MKK | 131 | NA21378 | M | - | A,C,H,N                                                          | C   | - | NA21448 | M | - | A,G,H,N                          | G   | - | R,?  |
| MKK | 131 | NA21378 | M | - | A,C,H,N                                                          | U   | - | NA21453 | M | - | A,G,H,N                          | U   | - | RS,P |
| MKK | 131 | NA21378 | M | - | 1C,GA,HA,HN                                                      | -   | - | NA21455 | F | - | 1C,GN,HA,HN                      | -   | - | N    |
| MKK | 131 | NA21378 | M | - | F                                                                | F   | - | NA21493 | F | - | F                                | F   | - | R    |
| MKK | 131 | NA21378 | M | - | A                                                                | A   | - | NA21494 | F | - | N                                | N   | - | R*   |
| MKK | 131 | NA21423 | M | P | P                                                                | O,P | - | NA21425 | F | O | O                                | O,P | - |      |
| MKK | 131 | NA21423 | M | - | 1C,GA,GG,HA,HN                                                   | -   | - | NA21439 | M | - | 1C,GC,GN,HA,HN                   | -   | - | N    |
| MKK | 131 | NA21423 | M | - | A,C,G,H,N                                                        | A   | - | NA21447 | M | - | A,C,G,H,N                        | N   | - | R,?  |
| MKK | 131 | NA21424 | F | P | P                                                                | O,P | - | NA21425 | F | O | O                                | O,P | - |      |
| MKK | 131 | NA21424 | F | - | F                                                                | F   | - | NA21596 | M | - | F                                | F   | - | R    |
| MKK | 131 | NA21425 | F | - | 1C,GC,GN,HA,HN                                                   | -   | - | NA21447 | M | - | 1C,GA,GG,HA,HN                   | -   | - | N    |
| MKK | 131 | NA21425 | F | - | N                                                                | N   | - | NA21596 | M | - | A                                | A   | - | R    |
| MKK | 131 | NA21435 | M | - | 1C,UN                                                            | -   | - | NA21520 | M | - | 1C,UN                            | -   | - | N    |
| MKK | 131 | NA21435 | M | - | 1C,UN                                                            | -   | - | NA21613 | F | - | 1C,UN                            | -   | - | N    |
| MKK | 131 | NA21435 | M | - | 1C,GA,GC,GG,GN,H,A,HN,UN                                         | -   | - | NA21617 | F | - | 1C,GA,GC,GG,GN,H,A,HN,UN         | -   | - | N    |
| MKK | 131 | NA21435 | M | - | A,C,G,H,N                                                        | U   | - | NA21634 | M | - | A,C,G,H,N                        | U   | - | R    |
| MKK | 131 | NA21435 | M | - | 1C,GA,GG,HA,HN,1C,A,C,G,GA,GC,G,G,GN,H,H,A,HN,N,1C,GA,GG,HA,HN,U | U   | - | NA21647 | M | - | 1C,GC,GN,HA,HN,U                 | U   | - | R    |
| MKK | 131 | NA21435 | M | - | N                                                                | -   | - | NA21648 | M | - | N                                | -   | - | N    |
| MKK | 131 | NA21435 | M | - | A,C,G,H,N                                                        | H   | - | NA21825 | F | - | A,C,G,H,N                        | H   | - | R,?  |
| MKK | 131 | NA21438 | F | P | P                                                                | O,P | - | NA21439 | M | O | O                                | O,P | - |      |
| MKK | 131 | NA21439 | M | O | O                                                                | O,P | - | NA21447 | M | P | P                                | O,P | - |      |
| MKK | 131 | NA21448 | M | - | A,C,G,H,N                                                        | H   | - | NA21453 | M | - | A,C,G,H,N                        | H   | - | R,?  |
| MKK | 131 | NA21448 | M | - | 1C,GA,GG,HA,HN                                                   | -   | - | NA21455 | F | - | 1C,GC,GN,HA,HN                   | -   | - | N    |
| MKK | 131 | NA21448 | M | - | A,G,H,N,1C,GA,GG,HA                                              | G   | - | NA21493 | F | - | A,C,H,N,1C,GC,GN,HA              | C   | - | R,?  |
| MKK | 131 | NA21448 | M | - | HA                                                               | -   | - | NA21494 | F | - | HN                               | -   | - | N    |
| MKK | 131 | NA21453 | M | P | P                                                                | O,P | - | NA21455 | F | O | O                                | O,P | - |      |
| MKK | 131 | NA21453 | M | - | A,G,H,N                                                          | U   | - | NA21493 | F | - | A,C,H,N                          | U   | - | RS,P |
| MKK | 131 | NA21453 | M | - | 1C,GA,GG,HA                                                      | -   | - | NA21494 | F | - | 1C,GC,GN,HA,HN                   | -   | - | N    |
| MKK | 131 | NA21454 | F | P | P                                                                | O,P | - | NA21455 | F | O | O                                | O,P | - |      |
| MKK | 131 | NA21455 | F | - | 1C,GN,HA,HN                                                      | -   | - | NA21493 | F | - | 1C,GA,HA,HN                      | -   | - | N    |
| MKK | 131 | NA21493 | F | P | P                                                                | O,P | - | NA21494 | F | O | O                                | O,P | - |      |
| MKK | 131 | NA21494 | F | O | O                                                                | O,P | - | NA21522 | M | P | P                                | O,P | - |      |
| MKK | 131 | NA21494 | F | - | 1C,GN,HA,HN                                                      | -   | - | NA21528 | M | - | 1C,GA,HA,HN                      | -   | - | N    |
| MKK | 131 | NA21494 | F | - | 1C,GN,HA,HN                                                      | -   | - | NA21587 | M | - | 1C,GA,HA,HN                      | -   | - | N    |
| MKK | 131 | NA21494 | F | - | C,H                                                              | H   | - | NA21682 | M | - | G,H                              | H   | - | R,?  |
| MKK | 131 | NA21519 | M | - | 1C,UN,1C,C,GA,GC,GG,G,N,HA,HN,UN                                 | G   | - | NA21619 | M | - | 1C,UN,1C,G,GA,GC,GG,G,N,HA,HN,UN | -   | - | N    |
| MKK | 131 | NA21519 | M | - | GC,HN,U                                                          | -   | - | NA21635 | F | - | GG,HA,U                          | C   | - | R,?  |
| MKK | 131 | NA21519 | M | - | N                                                                | -   | - | NA21636 | F | - | N                                | -   | - | N    |

|     |     |         |   |   |                                      |     |   |         |   |   |                                      |     |   |      |
|-----|-----|---------|---|---|--------------------------------------|-----|---|---------|---|---|--------------------------------------|-----|---|------|
| MKK | 131 | NA21519 | M | - | 1C,GA,GC<br>,GG,GN,H<br>A,HN,UN      | G   | - | NA21678 | M | - | 1C,GA,GC<br>,GG,GN,H<br>A,HN,UN      | C   | - | R*,? |
| MKK | 131 | NA21520 | M | - | F                                    | F   | - | NA21613 | F | - | F                                    | F   | - | R    |
| MKK | 131 | NA21520 | M | - | A,C,H,N                              | U   | - | NA21617 | F | - | A,G,H,N                              | U   | - | RS,P |
| MKK | 131 | NA21520 | M | - | 1C,GA,HA<br>,HN                      | -   | - | NA21648 | M | - | 1C,GN,HA<br>,HN                      | -   | - | N    |
| MKK | 131 | NA21520 | M | - | A,C,H,N                              | N   | - | NA21686 | F | - | A,G,H,N                              | A   | - | R,?  |
| MKK | 131 | NA21520 | M | - | 1C,UN                                | -   | - | NA21825 | F | - | 1C,UN                                | -   | - | N    |
| MKK | 131 | NA21522 | M | - | A,G,H,N                              | H   | - | NA21528 | M | - | A,C,H,N                              | H   | - | R,?  |
| MKK | 131 | NA21522 | M | - | A,G,H,N                              | H   | - | NA21587 | M | - | A,C,H,N                              | H   | - | R*,? |
| MKK | 131 | NA21522 | M | - | O,P                                  | P   | - | NA21682 | M | - | O,P                                  | O   | - | R,?  |
| MKK | 131 | NA21523 | M | P | P                                    | O,P | - | NA21525 | M | O | O                                    | O,P | - |      |
| MKK | 131 | NA21524 | F | P | P                                    | O,P | - | NA21525 | M | O | O                                    | O,P | - |      |
| MKK | 131 | NA21528 | M | - | F                                    | F   | - | NA21587 | M | - | F                                    | F   | - | R    |
| MKK | 131 | NA21528 | M | - | 1C,GA,GC<br>,HA,HN,U<br>N            | -   | - | NA21682 | M | - | 1C,GG,G<br>N,HA,HN,<br>UN            | -   | - | N    |
| MKK | 131 | NA21587 | M | - | 1C,GA,GC<br>,HA,HN,U<br>N            | -   | - | NA21682 | M | - | 1C,GG,G<br>N,HA,HN,<br>UN            | -   | - | N    |
| MKK | 131 | NA21613 | F | - | A,C,H,N                              | U   | - | NA21617 | F | - | A,G,H,N                              | U   | - | RS,P |
| MKK | 131 | NA21613 | F | - | 1C,GA,HA<br>,HN                      | -   | - | NA21648 | M | - | 1C,GN,HA<br>,HN                      | -   | - | N    |
| MKK | 131 | NA21613 | F | - | A,C,H,N                              | N   | - | NA21686 | F | - | A,G,H,N                              | A   | - | R,?  |
| MKK | 131 | NA21613 | F | - | 1C,UN                                | -   | - | NA21825 | F | - | 1C,UN                                | -   | - | N    |
| MKK | 131 | NA21617 | F | - | 1C,UN                                | -   | - | NA21647 | M | - | 1C,UN                                | -   | - | N    |
| MKK | 131 | NA21617 | F | - | 1C,UN                                | -   | - | NA21686 | F | - | 1C,UN                                | -   | - | N    |
| MKK | 131 | NA21617 | F | - | 1C,GA,GC<br>,GG,GN,H<br>A,HN,UN      | -   | - | NA21825 | F | - | 1C,GA,GC<br>,GG,GN,H<br>A,HN,UN      | -   | - | N    |
| MKK | 131 | NA21619 | M | - | A,C,G,H,N                            | H   | - | NA21635 | F | - | A,C,G,H,N                            | H   | - | R*,? |
| MKK | 131 | NA21619 | M | - | 1C,GA,GG<br>,HA,HN<br>A,G,GN,H<br>,N | -   | - | NA21636 | F | - | 1C,GC,GN<br>,HA,HN<br>A,C,GA,H,<br>N | -   | - | N    |
| MKK | 131 | NA21619 | M | - | A,G,GN,H<br>,N                       | H   | - | NA21678 | M | - | A,G,GN,H<br>,N                       | H   | - | R,?  |
| MKK | 131 | NA21634 | M | P | P                                    | O,P | - | NA21636 | F | O | O                                    | O,P | - |      |
| MKK | 131 | NA21634 | M | - | A,C,G,H,N                            | U   | - | NA21647 | M | - | A,C,G,H,N                            | U   | - | R    |
| MKK | 131 | NA21634 | M | - | 1C,GA,GG<br>,HA,HN                   | -   | - | NA21648 | M | - | 1C,GC,GN<br>,HA,HN                   | -   | - | N    |
| MKK | 131 | NA21634 | M | - | 1C,UN                                | -   | - | NA21825 | F | - | 1C,UN                                | -   | - | N    |
| MKK | 131 | NA21635 | F | P | P                                    | O,P | - | NA21636 | F | O | O                                    | O,P | - |      |
| MKK | 131 | NA21635 | F | - | F                                    | F   | - | NA21678 | M | - | F                                    | F   | - | R    |
| MKK | 131 | NA21636 | F | - | 1C,GC,GN<br>,HA,HN                   | -   | - | NA21647 | M | - | 1C,GA,GG<br>,HA,HN                   | -   | - | N    |
| MKK | 131 | NA21636 | F | - | N                                    | N   | - | NA21678 | M | - | A                                    | A   | - | R    |
| MKK | 131 | NA21647 | M | P | P                                    | O,P | - | NA21648 | M | O | O                                    | O,P | - |      |
| MKK | 131 | NA21647 | M | - | 1C,UN                                | -   | - | NA21825 | F | - | 1C,UN                                | -   | - | N    |
| MKK | 131 | NA21648 | M | O | O                                    | O,P | - | NA21686 | F | P | P                                    | O,P | - |      |
| MKK | 169 | NA21573 | M | - | F                                    | F   | - | NA21577 | M | - | F                                    | F   | - | R    |
| YRI | 2   | NA19184 | M | P | P                                    | O,P | - | NA19186 | M | O | O                                    | O,P | - |      |
| YRI | 2   | NA19185 | F | P | P                                    | O,P | - | NA19186 | M | O | O                                    | O,P | - |      |
| YRI | 3   | NA19146 | M | P | P                                    | O,P | - | NA19148 | F | O | O                                    | O,P | - |      |
| YRI | 3   | NA19147 | F | P | P                                    | O,P | - | NA19148 | F | O | O                                    | O,P | - |      |
| YRI | 11  | NA19178 | M | P | P                                    | O,P | - | NA19180 | F | O | O                                    | O,P | - |      |



|     |    |         |   |   |                                 |     |   |         |   |   |                                 |     |   |   |
|-----|----|---------|---|---|---------------------------------|-----|---|---------|---|---|---------------------------------|-----|---|---|
| YRI | 11 | NA19178 | M | - | 1C,GA,GC<br>,GG,GN,H<br>A,HN,UN | -   | U | NA19200 | M | - | 1C,GA,GC<br>,GG,GN,H<br>A,HN,UN | -   | U |   |
| YRI | 11 | NA19178 | M | - | GC,UN                           | -   | U | NA19202 | F | - | GG,UN                           | -   | U | P |
| YRI | 11 | NA19179 | F | P | P                               | O,P | - | NA19180 | F | O | O                               | O,P | - |   |
| YRI | 11 | NA19180 | F | - | GG,UN                           | -   | U | NA19200 | M | - | GC,UN                           | -   | U | P |
| YRI | 11 | NA19200 | M | P | P                               | O,P | - | NA19202 | F | O | O                               | O,P | - |   |
| YRI | 11 | NA19201 | F | P | P                               | O,P | - | NA19202 | F | O | O                               | O,P | - |   |
| YRI | 12 | NA18484 | F | O | O                               | O,P | - | NA18486 | M | P | P                               | O,P | - |   |
| YRI | 12 | NA18484 | F | O | O                               | O,P | - | NA18488 | F | P | P                               | O,P | - |   |
| YRI | 15 | NA19189 | M | P | P                               | O,P | - | NA19191 | M | O | O                               | O,P | - |   |
| YRI | 15 | NA19190 | F | P | P                               | O,P | - | NA19191 | M | O | O                               | O,P | - |   |
| YRI | 20 | NA19113 | M | P | P                               | O,P | - | NA19115 | F | O | O                               | O,P | - |   |
| YRI | 20 | NA19114 | F | P | P                               | O,P | - | NA19115 | F | O | O                               | O,P | - |   |
| YRI | 24 | NA19095 | F | P | P                               | O,P | - | NA19097 | F | O | O                               | O,P | - |   |
| YRI | 24 | NA19096 | M | P | P                               | O,P | - | NA19097 | F | O | O                               | O,P | - |   |
| YRI | 26 | NA18909 | F | P | P                               | O,P | - | NA18911 | M | O | O                               | O,P | - |   |
| YRI | 26 | NA18910 | M | P | P                               | O,P | - | NA18911 | M | O | O                               | O,P | - |   |
| YRI | 29 | NA19247 | F | P | P                               | O,P | - | NA19249 | M | O | O                               | O,P | - |   |
| YRI | 29 | NA19248 | M | P | P                               | O,P | - | NA19249 | M | O | O                               | O,P | - |   |
| YRI | 31 | NA18485 | M | O | O                               | O,P | - | NA18487 | M | P | P                               | O,P | - |   |
| YRI | 31 | NA18485 | M | O | O                               | O,P | - | NA18489 | F | P | P                               | O,P | - |   |
| YRI | 32 | NA19181 | M | P | P                               | O,P | - | NA19183 | F | O | O                               | O,P | - |   |
| YRI | 32 | NA19182 | F | P | P                               | O,P | - | NA19183 | F | O | O                               | O,P | - |   |
| YRI | 33 | NA19256 | M | P | P                               | O,P | - | NA19258 | M | O | O                               | O,P | - |   |
| YRI | 33 | NA19257 | F | P | P                               | O,P | - | NA19258 | M | O | O                               | O,P | - |   |
| YRI | 34 | NA19117 | M | P | P                               | O,P | - | NA19174 | M | O | O                               | O,P | - |   |
| YRI | 34 | NA19118 | F | P | P                               | O,P | - | NA19174 | M | O | O                               | O,P | - |   |
| YRI | 38 | NA18518 | F | O | O                               | O,P | - | NA18519 | M | P | P                               | O,P | - |   |
| YRI | 38 | NA18518 | F | O | O                               | O,P | - | NA18520 | F | P | P                               | O,P | - |   |
| YRI | 39 | NA19213 | M | P | P                               | O,P | - | NA19215 | F | O | O                               | O,P | - |   |
| YRI | 39 | NA19214 | F | P | P                               | O,P | - | NA19215 | F | O | O                               | O,P | - |   |
| YRI | 41 | NA19197 | F | P | P                               | O,P | - | NA19199 | F | O | O                               | O,P | - |   |
| YRI | 41 | NA19198 | M | P | P                               | O,P | - | NA19199 | F | O | O                               | O,P | - |   |
| YRI | 46 | NA19121 | M | P | P                               | O,P | - | NA19123 | M | O | O                               | O,P | - |   |
| YRI | 46 | NA19122 | F | P | P                               | O,P | - | NA19123 | M | O | O                               | O,P | - |   |
| YRI | 47 | NA18916 | F | P | P                               | O,P | - | NA18930 | F | O | O                               | O,P | - |   |
| YRI | 47 | NA18917 | M | P | P                               | O,P | - | NA18930 | F | O | O                               | O,P | - |   |
| YRI | 48 | NA18933 | F | P | P                               | O,P | - | NA18935 | M | O | O                               | O,P | - |   |
| YRI | 48 | NA18934 | M | P | P                               | O,P | - | NA18935 | M | O | O                               | O,P | - |   |
| YRI | 49 | NA18923 | M | P | P                               | O,P | - | NA18925 | M | O | O                               | O,P | - |   |
| YRI | 49 | NA18924 | F | P | P                               | O,P | - | NA18925 | M | O | O                               | O,P | - |   |
| YRI | 52 | NA18497 | M | O | O                               | O,P | - | NA18498 | M | P | P                               | O,P | - |   |
| YRI | 52 | NA18497 | M | O | O                               | O,P | - | NA18499 | F | P | P                               | O,P | - |   |
| YRI | 62 | NA18867 | F | P | P                               | O,P | - | NA18869 | M | O | O                               | O,P | - |   |
| YRI | 62 | NA18868 | M | P | P                               | O,P | - | NA18869 | M | O | O                               | O,P | - |   |

|     |     |         |   |   |       |     |    |         |   |   |       |     |    |
|-----|-----|---------|---|---|-------|-----|----|---------|---|---|-------|-----|----|
| YRI | 65  | NA19107 | M | P | P     | O,P | -  | NA19109 | F | O | O     | O,P | -  |
| YRI | 65  | NA19108 | F | P | P     | O,P | -  | NA19109 | F | O | O     | O,P | -  |
| YRI | 66  | NA19235 | F | P | P     | O,P | -  | NA19237 | F | O | O     | O,P | -  |
| YRI | 66  | NA19236 | M | P | P     | O,P | -  | NA19237 | F | O | O     | O,P | -  |
| YRI | 71  | NA19224 | M | O | O     | O,P | -  | NA19225 | F | P | P     | O,P | -  |
| YRI | 71  | NA19224 | M | O | O     | O,P | -  | NA19226 | M | P | P     | O,P | -  |
| YRI | 81  | NA18509 | M | O | O,P   | O,P | -  | NA18511 | F | P | O,P   | O,P | -  |
| YRI | 83  | NA19149 | F | P | P     | O,P | -  | NA19151 | F | O | O     | O,P | -  |
| YRI | 83  | NA19150 | M | P | P     | O,P | -  | NA19151 | F | O | O     | O,P | -  |
| YRI | 85  | NA18873 | F | P | P     | O,P | -  | NA18875 | F | O | O     | O,P | -  |
| YRI | 85  | NA18874 | M | P | P     | O,P | -  | NA18875 | F | O | O     | O,P | -  |
| YRI | 86  | NA18503 | M | O | O     | O,P | -  | NA18504 | M | P | P     | O,P | -  |
| YRI | 86  | NA18503 | M | O | O     | O,P | -  | NA18505 | F | P | P     | O,P | -  |
| YRI | 91  | NA19137 | F | P | P     | O,P | -  | NA19139 | M | O | O     | O,P | -  |
| YRI | 91  | NA19138 | M | P | P     | O,P | -  | NA19139 | M | O | O     | O,P | -  |
| YRI | 92  | NA19152 | F | P | P     | O,P | -  | NA19154 | M | O | O     | O,P | -  |
| YRI | 92  | NA19153 | M | P | P     | O,P | -  | NA19154 | M | O | O     | O,P | -  |
| YRI | 94  | NA19221 | F | O | O     | O,P | -  | NA19222 | F | P | P     | O,P | -  |
| YRI | 94  | NA19221 | F | O | O     | O,P | -  | NA19223 | M | P | P     | O,P | -  |
| YRI | 95  | NA18500 | M | O | O,P   | O,P | -  | NA18501 | M | P | O,P   | O,P | -  |
| YRI | 105 | NA18870 | F | P | P     | O,P | -  | NA18872 | M | O | O     | O,P | -  |
| YRI | 105 | NA18871 | M | P | P     | O,P | -  | NA18872 | M | O | O     | O,P | -  |
| YRI | 109 | NA18861 | F | P | P     | O,P | -  | NA18863 | M | O | O     | O,P | -  |
| YRI | 109 | NA18862 | M | P | P     | O,P | -  | NA18863 | M | O | O     | O,P | -  |
| YRI | 110 | NA18855 | F | P | O,P   | O,P | -  | NA18857 | M | O | O,P   | O,P | -  |
| YRI | 115 | NA19171 | M | P | P     | O,P | -  | NA19173 | M | O | O     | O,P | -  |
| YRI | 115 | NA19172 | F | P | P     | O,P | -  | NA19173 | M | O | O     | O,P | -  |
| YRI | 117 | NA18515 | M | O | O     | O,P | -  | NA18516 | M | P | P     | O,P | -  |
| YRI | 117 | NA18515 | M | O | O     | O,P | -  | NA18517 | F | P | P     | O,P | -  |
| YRI | 122 | NA18912 | F | P | P     | O,P | -  | NA18914 | M | O | O     | O,P | -  |
| YRI | 122 | NA18913 | M | P | P     | O,P | -  | NA18914 | M | O | O     | O,P | -  |
| YRI | 122 | NA18913 | M | - | O,P   | O,P | -  | NA19238 | F | - | O,P   | O,P | -  |
| YRI | 122 | NA18913 | M | - | G,H   | H   | -  | NA19240 | F | - | C,H   | H   | -  |
| YRI | 122 | NA18914 | M | - | C,H   | C   | -  | NA19238 | F | - | G,H   | G   | -  |
| YRI | 122 | NA18914 | M | - | HA,HN | -   | HN | NA19240 | F | - | HA,HN | -   | HA |
| YRI | 122 | NA19238 | F | P | P     | O,P | -  | NA19240 | F | O | O     | O,P | -  |
| YRI | 122 | NA19239 | M | P | P     | O,P | -  | NA19240 | F | O | O     | O,P | -  |
| YRI | 131 | NA19209 | F | P | P     | O,P | -  | NA19211 | M | O | O     | O,P | -  |
| YRI | 131 | NA19210 | M | P | P     | O,P | -  | NA19211 | M | O | O     | O,P | -  |
| YRI | 133 | NA18506 | M | O | O     | O,P | -  | NA18507 | M | P | P     | O,P | -  |
| YRI | 133 | NA18506 | M | O | O     | O,P | -  | NA18508 | F | P | P     | O,P | -  |
| YRI | 134 | NA19159 | F | P | P     | O,P | -  | NA19161 | M | O | O     | O,P | -  |
| YRI | 134 | NA19160 | M | P | P     | O,P | -  | NA19161 | M | O | O     | O,P | -  |
| YRI | 141 | NA18858 | F | P | P     | O,P | -  | NA18860 | M | O | O     | O,P | -  |
| YRI | 141 | NA18859 | M | P | P     | O,P | -  | NA18860 | M | O | O     | O,P | -  |

R,?  
R,?  
?

|     |     |         |   |   |                    |     |    |         |   |   |                    |     |    |   |
|-----|-----|---------|---|---|--------------------|-----|----|---------|---|---|--------------------|-----|----|---|
| YRI | 149 | NA19127 | F | P | P                  | O,P | -  | NA19129 | F | O | O                  | O,P | -  |   |
| YRI | 149 | NA19128 | M | P | P                  | O,P | -  | NA19129 | F | O | O                  | O,P | -  |   |
| YRI | 150 | NA19130 | M | P | P                  | O,P | -  | NA19132 | F | O | O                  | O,P | -  |   |
| YRI | 150 | NA19130 | M | - | A,C,G,H,N          | AV  | -  | NA19192 | M | - | A,C,G,H,N          | AV  | -  | ? |
| YRI | 150 | NA19130 | M | - | 1C,GA,GG<br>,HA,HN | -   | 1C | NA19194 | M | - | 1C,GC,GN<br>,HA,HN | -   | 1C | ? |
| YRI | 150 | NA19131 | F | P | P                  | O,P | -  | NA19132 | F | O | O                  | O,P | -  |   |
| YRI | 150 | NA19132 | F | - | 1C,GC,GN<br>,HA,HN | -   | GN | NA19192 | M | - | 1C,GA,GG<br>,HA,HN | -   | GA | ? |
| YRI | 150 | NA19192 | M | P | P                  | O,P | -  | NA19194 | M | O | O                  | O,P | -  |   |
| YRI | 150 | NA19193 | F | P | P                  | O,P | -  | NA19194 | M | O | O                  | O,P | -  |   |
| YRI | 152 | NA19116 | F | P | P                  | O,P | -  | NA19120 | M | O | O                  | O,P | -  |   |
| YRI | 152 | NA19119 | M | P | P                  | O,P | -  | NA19120 | M | O | O                  | O,P | -  |   |
| YRI | 155 | NA19093 | F | P | O,P                | O,P | -  | NA19094 | F | O | O,P                | O,P | -  |   |
| YRI | 157 | NA18852 | F | P | P                  | O,P | -  | NA18854 | M | O | O                  | O,P | -  |   |
| YRI | 157 | NA18853 | M | P | P                  | O,P | -  | NA18854 | M | O | O                  | O,P | -  |   |
| YRI | 160 | NA19140 | F | P | P                  | O,P | -  | NA19142 | M | O | O                  | O,P | -  |   |
| YRI | 160 | NA19141 | M | P | P                  | O,P | -  | NA19142 | M | O | O                  | O,P | -  |   |
| YRI | 164 | NA19206 | F | P | P                  | O,P | -  | NA19208 | M | O | O                  | O,P | -  |   |
| YRI | 164 | NA19207 | M | P | P                  | O,P | -  | NA19208 | M | O | O                  | O,P | -  |   |
| YRI | 165 | NA19101 | M | P | P                  | O,P | -  | NA19103 | M | O | O                  | O,P | -  |   |
| YRI | 165 | NA19102 | F | P | P                  | O,P | -  | NA19103 | M | O | O                  | O,P | -  |   |

Notes column codes:

**P** – PRIMUS provides more precise relationship prediction than other methods.

**P\*** - PRIMUS provides corrected relationship results.

**?** – One of the other methods reported a more precise relationship prediction than PRIMUS; however, we found several instances where these predictions are incomplete (i.e., the authors failed to recognize that there are more than one possible way to fit the pairwise relationships into a pedigree) or inaccurate.

**R** – Pemberton et al. prediction was based on RELPAIR results.

**R\*** - The Pemberton et al. reported relationship is based on manually reconstructed pedigrees, and it disagrees with the relationship that RELPAIR predicted.

**R<sup>§</sup>** - Pemberton et al. could not reconcile the predicted 2<sup>nd</sup> degree relationship with their manually reconstructed pedigree structure.

**N** – A possible 3<sup>rd</sup> degree relationship that was unreported in Pemberton et al.<sup>6</sup> and Kyriazopoulou-Panagiotopoulou et al.<sup>1</sup>. However, the MKK population is reported as a small, isolated population, which results in a low level of background relatedness among the samples. The background relatedness can make individuals appear more closely related than they actually are.

| Code | Relationship                                    |
|------|-------------------------------------------------|
| P    | Parent                                          |
| O    | Off-spring                                      |
| F    | Full-sibling                                    |
| G    | Grandparent                                     |
| C    | Grandchild                                      |
| A    | Uncle/Aunt                                      |
| N    | Neice/Nephew                                    |
| H    | Half-sibling                                    |
| GG   | Great-Grandparent                               |
| GC   | Great-Grandchild                                |
| GA   | Great-Aunt/Uncle                                |
| GN   | Great-Neice/Nephew                              |
| HA   | Half-uncle/aunt                                 |
| HN   | half-neice/nephew                               |
| 1C   | First cousin                                    |
| U    | Uncertain                                       |
| UN   | Unrelated (4th degree or more distant relative) |

We used a minimum coefficient of relatedness of 0.09875 (3<sup>rd</sup> degree relatives or closer) to build the relationship networks for all of HapMap3; however, one family network in the Maasai in Kinyawa, Kenya, (MKK population) contained 126 individuals connected by 3<sup>rd</sup> degree relationships or closer, and it resulted in a number of possible pedigrees that were computationally infeasible. So, for the MKK population we used a minimum coefficient of relatedness of 0.168 (to include all 2<sup>nd</sup> degree relatives and closer), resulting in more manageable family network sizes. One MKK family still contained 61 individuals (Network 16 in this table). To reconstruct this network, we broke it into nine sub-networks each containing four to eight closely related samples. We ran PRIMUS on each pair of sub-networks in order to reconstruct relationships between the sub-networks.

Table S6. Possible combinations of pairwise 2<sup>nd</sup> and 3<sup>rd</sup> degree family relationships that are considered during reconstruction.

| 2 <sup>nd</sup> degree relationship between A and B | A                 | B              |
|-----------------------------------------------------|-------------------|----------------|
| 1. Half-sib through mother                          | Half-sib          | Half-sib       |
| 2. Half-sib through father                          | Half-sib          | Half-sib       |
| 3. Avuncular through mother                         | Nephew            | Uncle          |
| 4. Avuncular through mother                         | Uncle             | Nephew         |
| 5. Avuncular through father                         | Nephew            | Uncle          |
| 6. Avuncular through father                         | Uncle             | Nephew         |
| 7. Grandparent through father                       | Grandfather       | Grandson       |
| 8. Grandparent through father                       | Grandson          | Grandfather    |
| 9. Grandparent through mother                       | Grandfather       | Grandson       |
| 10. Grandparent through mother                      | Grandson          | Grandfather    |
|                                                     |                   |                |
| 3 <sup>rd</sup> degree relationship between A and B | A                 | B              |
| 1. Cousins through A mom and B mom                  | Cousins           | Cousins        |
| 2. Cousins through A mom and B dad                  | Cousins           | Cousins        |
| 3. Cousins through A dad and B mom                  | Cousins           | Cousins        |
| 4. Cousins through A dad and B dad                  | Cousins           | Cousins        |
| 5. Great-grandparental through mom's mom            | Great-grandfather | Great-grandson |
| 6. Great-grandparental through dad's mom            | Great-grandfather | Great-grandson |
| 7. Great-grandparental through mom's dad            | Great-grandfather | Great-grandson |
| 8. Great-grandparental through dad's dad            | Great-grandfather | Great-grandson |

|                                           |                |                   |
|-------------------------------------------|----------------|-------------------|
| 9. Great-grandparental through mom's mom  | Great-grandson | Great-grandfather |
| 10. Great-grandparental through dad's mom | Great-grandson | Great-grandfather |
| 11. Great-grandparental through mom's dad | Great-grandson | Great-grandfather |
| 12. Great-grandparental through dad's dad | Great-grandson | Great-grandfather |
| 13. Grand-avuncular through mom's mom     | Grand-uncle    | Grand-nephew      |
| 14. Grand-avuncular through dad's mom     | Grand-uncle    | Grand-nephew      |
| 15. Grand-avuncular through mom's dad     | Grand-uncle    | Grand-nephew      |
| 16. Grand-avuncular through dad's dad     | Grand-uncle    | Grand-nephew      |
| 17. Grand-avuncular through mom's mom     | Grand-nephew   | Grand-uncle       |
| 18. Grand-avuncular through dad's mom     | Grand-nephew   | Grand-uncle       |
| 19. Grand-avuncular through mom's dad     | Grand-nephew   | Grand-uncle       |
| 20. Grand-avuncular through dad's dad     | Grand-nephew   | Grand-uncle       |
| 21. Half-avuncular through mom's mom      | Half-uncle     | Half-nephew       |
| 22. Half-avuncular through dad's mom      | Half-uncle     | Half-nephew       |
| 23. Half-avuncular through mom's dad      | Half-uncle     | Half-nephew       |
| 24. Half-avuncular through dad's dad      | Half-uncle     | Half-nephew       |
| 25. Half-avuncular through mom's mom      | Half-nephew    | Half-uncle        |
| 26. Half-avuncular through dad's mom      | Half-nephew    | Half-uncle        |
| 27. Half-avuncular through mom's dad      | Half-nephew    | Half-uncle        |
| 28. Half-avuncular through dad's dad      | Half-nephew    | Half-uncle        |

As the degree of relatedness increases from 2<sup>nd</sup> to 3<sup>rd</sup> degree, there are far more relationships to test during reconstruction. Continuing to 4<sup>th</sup> degree relatives would require testing even more relationships.

### Supplemental References

1. Kyriazopoulou-Panagiotopoulou, S., Kashef Haghighi, D., Aerni, S.J., Sundquist, A., Bercovici, S., and Batzoglou, S. (2011). Reconstruction of genealogical relationships with applications to Phase III of HapMap. *Bioinformatics* 27, i333-341.
2. Shem-Tov, D., and Halperin, E. (2014). Historical pedigree reconstruction from extant populations using PARTITIONING of RELATIVES (PREPARE). *PLoS computational biology* 10, e1003610.
3. He, D., Wang, Z., Han, B., Parida, L., and Eskin, E. (2013). IPED: inheritance path-based pedigree reconstruction algorithm using genotype data. *Journal of computational biology : a journal of computational molecular cell biology* 20, 780-791.
4. Kirkpatrick, B., Li, S.C., Karp, R.M., and Halperin, E. (2011). Pedigree reconstruction using identity by descent. *Journal of computational biology : a journal of computational molecular cell biology* 18, 1481-1493.
5. Epstein, M.P., Duren, W.L., and Boehnke, M. (2000). Improved inference of relationships for pairs of individuals. *American journal of human genetics* 67, 1219-1231.
6. Pemberton, T.J., Wang, C., Li, J.Z., and Rosenberg, N.A. (2010). Inference of unexpected genetic relatedness among individuals in HapMap Phase III. *Am J Hum Genet* 87, 457-464.
