# Supplementary material
Source: PubMed Central journal article supplement (PMC4225580)
Supplement: mmc2.pdf [file mmc2.pdf]

# PRIMUS: Rapid Reconstruction of Pedigrees from Genome-wide Estimates of Identity by Descent

Jeffrey Staples,<sup>1</sup> Dandi Qiao,<sup>2,3</sup> Michael H. Cho,<sup>2,4</sup> Edwin K. Silverman,<sup>2,4</sup> University of Washington Center for Mendelian Genomics,<sup>1</sup> Deborah A. Nickerson,<sup>1,\*</sup> and Jennifer E. Below<sup>5,\*</sup>

Understanding and correctly utilizing relatedness among samples is essential for genetic analysis; however, managing sample records and pedigrees can often be error prone and incomplete. Data sets ascertained by random sampling often harbor cryptic relatedness that can be leveraged in genetic analyses for maximizing power. We have developed a method that uses genome-wide estimates of pairwise identity by descent to identify families and quickly reconstruct and score all possible pedigrees that fit the genetic data by using up to third-degree relatives, and we have included it in the software package PRIMUS (Pedigree Reconstruction and Identification of the Maximally Unrelated Set). Here, we validate its performance on simulated, clinical, and HapMap pedigrees. Among these samples, we demonstrate that PRIMUS can verify reported pedigree structures and identify cryptic relationships. Finally, we show that PRIMUS reconstructed pedigrees, all of which were previously unknown, for 203 families from a cohort collected in Starr County, TX (1,890 samples).

## Introduction

Following the transmission of variants through a genealogy is at the foundation of modern genetics. Today, investigators continue to use pedigrees to determine the heritability and genetic models for traits and disorders, and knowing the exact pedigree structure allows them to correctly identify the genetic mode of disease inheritance and utilize powerful genetic-analysis tools that require, or benefit from, the true pedigree structure. Such tools include linkage,<sup>1</sup> family-based association,<sup>2</sup> pedigree-aware imputation, pedigree-aware phasing, Mendelian error checking, heritability, and pVAAS (Pedigree Variant Annotation, Analysis, and Search Tool).<sup>3</sup> In many instances, knowing the pedigree that is consistent with the generated genetic data is crucial to solving the disease.<sup>4–7</sup> Additionally, the collection of samples from a limited geographical region for a genetic analysis might introduce biases toward unintentionally obtaining samples of unknown relatedness for which a previously unknown pedigree could be reconstructed and used. As a result, large case-control consortia can harbor cryptic relatedness,<sup>8</sup> which can bias the analysis unless the cryptic relatedness is removed or investigators use a method that models a kinship matrix.<sup>9</sup> However, a substantial increase in power can be obtained if the true pedigree structures are known.<sup>9</sup>

Given the benefits of family-based studies in genetic research, an enormous amount of effort is spent collecting and maintaining accurate sample records and corresponding pedigrees. However, despite the best efforts of investigators, pedigree and sample errors are still quite common and require careful examination so that reductions in power to detect linkage can be avoided.<sup>10</sup> The rate of non-

paternities in studies has been reported to be between 0.8% and 30% (median = 3.7%;  $n = 17$ ),<sup>11</sup> and other reports have shown more conservative estimates at around 1%–1.5%.<sup>12,13</sup> Even at the conservative rate of 1%, a pedigree with six children has a 6% chance of being incorrect as a result of a nonpaternity error, and the pedigree error rate will be much higher after other common errors, such as sample swaps, duplicate samples, contamination, and other relationship discrepancies, are accounted for. The standard practice for checking and correcting pedigrees and relationships within genetic data sets is to use pairwise prediction programs,<sup>14–18</sup> such as RELPAIR<sup>19</sup> and PREST (Pedigree Relationship Statistical Test),<sup>20</sup> to verify that the level of relatedness between every pair of individuals falls close to the expected level of relatedness from the reported pedigree.<sup>21–28</sup>

Although using pairwise estimates to check relationships in pedigrees is sometimes sufficient, there are four major drawbacks that we illustrate in this manuscript. First, pairwise checking will not catch pedigree errors if there are multiple pedigree structures that fit the genetic data and if the reported pedigree structure is among the incorrect possibilities. Second, pairwise relationship checking does not provide, or even suggest, the correct pedigree in the case of inconsistency between the data and the reported pedigree. Instead, these methods flag inconsistent relationships for the investigator to review by hand. Third, pairwise inconsistencies between genotyped samples are often resolved by the removal of the inconsistent sample(s), which can result in the unnecessary loss of samples or in accepting an incorrect pedigree as true. Fourth and finally, manually reconstructing an unknown pedigree with pairwise relationship comparisons requires arduous, error-prone labor.

<sup>1</sup>Department of Genome Sciences, University of Washington, Seattle, WA 98195, USA; <sup>2</sup>Channing Division of Network Medicine, Harvard School of Public Health, Boston, MA 02115, USA; <sup>3</sup>Department of Biostatistics, Harvard School of Public Health, Boston, MA 02115, USA; <sup>4</sup>Division of Pulmonary and Critical Care Medicine, Brigham and Women's Hospital, Boston, MA 02115, USA; <sup>5</sup>Epidemiology, Human Genetics, & Environmental Sciences, University of Texas Health Science Center, Houston, TX 77225, USA

\*Correspondence: [debnick@uw.edu](mailto:debnick@uw.edu) (D.A.N.), [jennifer.e.below@uth.tmc.edu](mailto:jennifer.e.below@uth.tmc.edu) (J.E.B.)

<http://dx.doi.org/10.1016/j.ajhg.2014.10.005>. ©2014 by The American Society of Human Genetics. All rights reserved.

**Table 1. Expected Mean IBD Proportions for the Outbred Familial Relationship Categories**

| Familial Relationship                                                  | IBD0   | IBD1   | IBD2 |
|------------------------------------------------------------------------|--------|--------|------|
| Parental                                                               | 0      | 1      | 0    |
| Full-sibling                                                           | 0.25   | 0.5    | 0.25 |
| Half-sibling, avuncular, and grandparental                             | 0.5    | 0.5    | 0    |
| First-cousin, great-grandparental, great-avuncular, and half-avuncular | 0.75   | 0.25   | 0    |
| Distantly related                                                      | varies | varies | 0    |
| Unrelated (includes relationships beyond the third degree)             | 1      | 0      | 0    |

IBD0, IBD1, and IBD2 are the genome proportions shared on 0, 1, and 2 chromosomes, respectively, between two individuals. Many relationships share the same expected mean IBD proportions; however, for full-sibling, second-degree, and third-degree relationships, a variance around the expected mean is due to the random nature of recombination events. Genotyping and other technical errors can contribute to this variance.

Previous attempts have been made to address this issue. For example, Pemberton et al.<sup>29</sup> manually reconstructed cryptic HapMap3 pedigrees, but the authors encountered inconsistencies they could not resolve by hand.

A possible solution to the drawbacks of checking pedigrees by pairwise comparisons is to use the genetic data to reconstruct the corresponding pedigree structure. Ideally, pedigree reconstruction would not only identify any inconsistencies in a pedigree but also automatically provide the correct pedigree. Pedigree-reconstruction methods exist, but the reason they are not the standard for checking pedigrees in genetics studies is that existing methods have limited uses. Current approaches are limited in the number of genetic variants that can be used,<sup>30–32</sup> are heavily biased in the presence of linkage disequilibrium between markers,<sup>33</sup> cannot reconstruct half-sibling relationships,<sup>34,35</sup> or cannot reconstruct a pedigree if it is connected by individuals for whom no genotype data are available.<sup>30–33</sup> Even the most recent methods—COP (Constructing Outbred Pedigrees) and CIP (Constructing Inbred Pedigrees),<sup>35</sup> IPED (Inheritance Path-based Pedigree Reconstruction)<sup>34</sup> and IPED2, and PREPARE (Partitioning of Relatives)<sup>36</sup>—assume that all genotyped individuals are in the same generation, requiring a priori knowledge of the relative generations of the samples or the pedigree structure. Using the age of individuals is not adequate; for example, it is not uncommon to have an uncle or aunt younger than a niece or nephew. The most recent methods are good at reconstructing a small niche of pedigrees structures, but few pedigree structures typical of human genetic studies fall into this niche. Indeed, these are not capable of reconstructing many basic and common pedigree structures (e.g., trios).

We have developed a pedigree-reconstruction method without many of the limitations of previous pedigree-reconstruction programs and have incorporated it into a software package known as Pedigree Reconstruction and Identification of the Maximally Unrelated Set (PRIMUS).<sup>37</sup>

Our method utilizes the power of SNP arrays or next-generation sequence data to evaluate genome-wide identity-by-descent (IBD) estimates generated by programs such as PLINK<sup>14</sup> or KING (Kinship-Based Inference for Genome-wide Association Studies).<sup>16</sup> Our method assigns relationships by using the expected mean and variance for each relationship class and leverages all pairwise relationships within a family (as well as genetically determined sex) to reconstruct the possible pedigree structures in a manner consistent with the observed pairwise sharing. We designed PRIMUS to improve on previous methods in several ways—PRIMUS (1) automatically reconstructs multigenerational pedigrees with genotyped samples in any generation, (2) reconstructs pedigrees by using all individuals connected to a pedigree at a level of third-degree relatives or closer, (3) requires no prior knowledge of the pedigree structure, (4) allows for missing (i.e., nongenotyped) individuals in the pedigree, (5) appropriately incorporates half siblings, (6) allows for, but does not require, additional information such as sex and age of samples to improve reconstruction, and (7) inputs and outputs common file formats to improve usability.

In this report, we validate the performance of PRIMUS on thousands of simulated pedigrees. We also demonstrate its ability to reconstruct clinical pedigrees and HapMap3 pedigrees and to find previously unknown relationships in a large population-based study from Starr County, TX, illustrating that PRIMUS can (1) reconstruct, validate, and correct reported pedigrees, (2) incorporate cryptic relatedness into known pedigrees, and (3) find and reconstruct previously unknown pedigrees that can exist within large genetic data sets.

## Material and Methods

### Simulated Pedigrees

We generated simulated pedigrees for the training and initial testing of PRIMUS by using a broad range of known pedigrees that contained different structures, sizes, genotypes, and combinations of missing data among the individuals. In all, thousands of pedigrees were generated for three classes of pedigree structures:

1. Size-12 pedigree: a 12-person pedigree that contains all relationships from Table 1 (Figure S1, available online).
2. Uniform pedigree: a variable-sized pedigree with no half-sibling relationships and in which each pair of parents is expected to have three children. However, so that the desired pedigree sizes can be obtained, there could be a single pair of parents with as few as one child or as many as four children (Figure S2).
3. Half-sibling pedigree: identical to the uniform pedigree except that there is a 30% chance that one person from each pair of parents has two children with another individual (Figure S2).

For both the uniform and the half-sibling pedigrees, we simulated complete pedigrees of sizes ranging from 5 to 400 individuals. For each pedigree, we created different genotypes for 100 versions of

the pedigree structures by using the method applied by Morrison<sup>38</sup> (see [Web Resources](#)): we randomly selected founder haplotypes with ~1,000,000 SNPs from among the unrelated HapMap3 CEU (Utah residents with ancestry from northern and western Europe from the CEPH collection) samples, and we simulated recombination as a homogeneous Poisson process by disregarding the centromere and using the approximation 1 Mb = 1 cM. We compared the true IBD proportions to those calculated by PLINK for IBD estimates generated from 6,000 and 1,000,000 SNPs ([Figure S3](#)). The correlation between the estimates and the true values was  $r^2 = 0.999$  with pedigrees of size 10 and  $r^2 = 0.974$  with pedigrees of size 400. IBD estimates generated from as few as 6,000 SNPs were still remarkably accurate ([Table S1](#)), and they improved as the number of SNPs increased. We also tested the accuracy of IBD estimates calculated with the overlap of the approximately 1,000,000 HapMap3 SNP set and commonly used SNP panels and found high accuracy levels ([Table S1](#)). Unless otherwise stated, the complete ~1,000,000-SNP sets were used for the simulations.

We also simulated data missingness in each of the uniform and half-sibling pedigrees. To accomplish this, we created ten additional versions of each pedigree by iteratively masking genetic data for a single sample until we had masked up to ten missing individuals. Data were eligible for masking if the individual had children and if his or her masking did not create a gap larger than a third-degree relationship. Eligible samples were masked at random, creating unique combinations of missing sample data for each pedigree.

### IBD Estimates

PRIMUS takes input from any program that provides estimates of the proportions of the genome shared identically by descent on zero, one, and two chromosomes (IBD0, IBD1, IBD2, respectively). We note that calculating accurate relationships and estimating pairwise IBD is a nontrivial problem and one that has been tackled by a number of methodologies.<sup>14,16,39–41</sup> IBD proportions presented here were calculated with the method-of-moments estimation implemented in PLINK.<sup>14</sup> Although it is not required for simulated pedigrees, some pedigrees might require careful analysis of admixture in the samples. In these cases, we applied the approaches recommended by Morrison<sup>38</sup> to remove ancestry-informative SNPs that could otherwise bias IBD estimates. The code used for calculating IBD estimates is available for download with the PRIMUS package ([Web Resources](#)).

### Family-Network Identification

PRIMUS first groups the samples into family networks (or groups) on the basis of the estimated pairwise coefficient of relatedness (two times the kinship coefficient).<sup>37</sup> An individual is only added to a family network if the sample is related to at least one other person in the network given a user-defined minimum coefficient of relatedness. For example, 0.1875, the midpoint between the mean expected IBD proportion for second- and third-degree relatives, is a threshold that will capture connections between most second-degree relatives or closer. The pedigree reconstruction is then performed independently on each family network within the data set.

### Familial-Relationship Prediction Using a Kernel-Density-Estimation Function

PRIMUS uses six relationship categories to reconstruct pedigrees on the basis of the expected mean IBD0, IBD1, and IBD2 estimates shown in [Table 1](#); however, distantly related and unrelated sam-

ples are handled as the same class during reconstruction. Both biological factors (i.e., recombination events, population substructure, historic inbreeding) and technical factors (i.e., density and distribution of the genotyped markers) contribute to variation around these means.

Given the IBD0, IBD1, and IBD2 estimates for a pair of individuals, PRIMUS predicts the corresponding relationship category by using a trained kernel density estimation (KDE; see [Web Resources](#)) for each of six familial relationship categories. We used the `scipy.stats.gaussian_kde` function (see SciPy in the [Web Resources](#)) with two training features: genome-wide estimates of IBD0 and IBD1. The training IBD0 and IBD1 estimates were selected from the IBD estimates generated with 6,000 SNPs for the 1,000 size-12 simulated pedigrees. We chose to use the lower number of SNPs so that the KDE could better handle the technical noise that comes with estimating IBD. We selected parent-offspring (PO), full-sibling (FS), second-degree, third-degree, distantly related, and unrelated relationships from each of the 1,000 simulated pedigrees and used them to train the respective KDEs. We used these simulated IBD proportions to train a KDE function for each of the six familial relationship categories.

Because bandwidth selection influences the trained KDE, we tested each KDE with different values for the coefficient factor used in calculating the kernel covariance matrices ([Figure S4](#)). These empirical tests allowed us to select the coefficient that best optimized reconstruction performance for the KDE of each relationship category. For the overlapping KDE distributions, we selected the smallest bandwidth that had no false-negative predictions of our test data set at a likelihood cutoff of 0.01 or lower. We selected the largest bandwidths possible for PO and FS relationships without overlap of the density distributions with other relationship categories. This minimizes the false-positive calls for these predictions. [Figure S5](#) shows a density plot for the KDE of each relationship category, which is consistent with previous reports of genome-wide IBD proportions.<sup>42</sup>

PRIMUS uses the trained kernels to predict the familial relationship category for each pairwise relationship. For a set of IBD0, IBD1, and IBD2 proportions, PRIMUS queries each kernel for the density at the IBD0 and IBD1 values and stores the density for each familial category in a vector. Then PRIMUS normalizes the vector by dividing each density by the sum of all densities, producing a vector of the likelihoods corresponding to each familial category. This relationship-likelihood vector is used during both reconstruction and ranking of possible pedigrees.

### Pedigree-Reconstruction Algorithm

For each family network, PRIMUS uses the relationship-likelihood vectors of all pairwise relationships to reconstruct all possible pedigrees, which is subject to the restrictions that (1) only relatives up to the third degree are considered and (2) the likelihood of each relationship class considered must exceed a minimum likelihood threshold (initial default of 0.3). We chose 0.3 as a good initial likelihood threshold on the basis of the relationship predictions of the uniform size-400 pedigrees (see [Figure S4](#) for details).

Reconstruction is an iterative process of identifying a pairwise relationship that is within the family network but that has not yet been incorporated into the pedigree, fitting that relationship into the pedigree, and testing that all of the relationships generated by adding the individual are compatible with the relationship-likelihood vectors and sex data for all of the samples. If the addition of a relationship is incompatible with the relationship-likelihood vectors or if two individuals of the same sex have

offspring, the pedigree is rejected and removed from the set of possible pedigrees. The reconstruction continues until all pairwise relationships from the family network are represented in each possible pedigree or until there are no possible pedigrees left for reconstruction.

PRIMUS reconstructs in three phases. Phase 1 uses PO and FS relationships. These two types of relationships are the most accurately predicted because PO relationships have no biological variance around the expected proportion of sharing, and FS relationships are the only nonconsanguineous relationships with IBD2 greater than 0. Phase 1 creates a backbone on which the more distant relationships are built. It adds a PO relationship between individuals A and B to the pedigree by creating a version of the pedigree in which A is the parent of B and another version in which B is the parent of A. Missing individuals are added as necessary so that each individual in the family network has zero or two parents. In phase 2, PRIMUS reconstructs second-degree (half-sibling, avuncular, and grandparental) relationships. The algorithm tests all possible rearrangements for each second-degree relationship within the pedigree and adds missing individuals to connect portions of the pedigree as necessary. Phase 3 is identical to phase 2, except that it considers third-degree (first-cousin, half-avuncular, great-avuncular, and great-grandparental) relationships. Because PRIMUS always checks every possible way that a sample can be added to the pedigree and eliminates pedigrees that do not fit, it is effectively exploring the entire search space of possible pedigrees. At present, PRIMUS does not reconstruct complex relationships (e.g., half sibling plus first cousin or double first cousins), consanguineous relationships, or relationships more distant than third-degree relatives. If one of these relationships is present in the data set, PRIMUS will match it to one of the relationship categories in [Table 1](#) and fit the relationship into the pedigree accordingly.

### Automatically Adjusting the Likelihood Threshold

If PRIMUS reaches the end of reconstruction and has zero possible pedigrees remaining, then it will automatically lower the likelihood threshold from the default of 0.3 to 0.2 and will rerun, allowing PRIMUS to consider additional possible pairwise relationships with likelihoods between 0.2 and 0.3. PRIMUS will continue to gradually drop the likelihood threshold until it produces a possible pedigree or it reaches a threshold below 0.01. If no possible pedigrees result from reconstruction after the threshold is lowered below 0.01, then PRIMUS stops reconstruction. For further details, see [Figure S4](#).

### Pedigree Scoring

For many families, there is only one possible pedigree that fits the data and the true pedigree. However, as a result of the unknown directionality of some relationships and missing data for individuals, PRIMUS can reconstruct more than one possible pedigree—including the true pedigree—that fits the genetic data. We attempt to increase the chances that the true pedigree is near the top of the list by ranking the possible pedigrees according to the relationship-likelihood vectors to obtain a pedigree score.

PRIMUS will rank the pedigrees according to a pedigree score it calculates by summing the log of the likelihood value of each relationship in the pedigree. For example, if a pedigree has only two individuals, and they have a 0.6 likelihood of being second-degree relatives and a 0.4 likelihood of being third-degree relatives, then all pedigrees in which they are second-degree relatives will be

ranked higher than pedigrees in which they are third-degree relatives. Additionally, if the ages of individuals are provided, then PRIMUS will flag and rank all pedigrees in which the ages are inconsistent (e.g., a child is older than a parent).

### PRIMUS Results and Output

PRIMUS uses Cranefoot<sup>43</sup> ([Web Resources](#)) to provide an image of each pedigree and provides the corresponding PLINK-formatted FAM file. Summary results, as well as a list of the possible relationships for each pair of related individuals (similar to [Table S5](#)), are provided for each family network and the entire data set. See the PRIMUS documentation for a complete list and description of output files and formats ([Web Resources](#)).

### Pedigree-Checking Program

PRIMUS also has the ability to check that a reported pedigree is among the produced reconstructed pedigrees. The user provides the reported pedigree in the form of a PLINK FAM or PED file, and PRIMUS compares it to each of the reconstructed pedigrees to see whether there is a match. In the case that the reconstruction includes additional samples that are not part of the reported pedigree, PRIMUS will find the match and report that there are additional genotyped samples included in the pedigree.

### Reconstructing Authentic Pedigrees

We tested the ability of PRIMUS to reconstruct several different pedigrees by using real genetic data. IBD estimates were obtained from genotypes generated with a HumanCytoSNP-12 BeadChip for all available pedigrees obtained by the University of Washington Center for Mendelian Genomics (UW CMG), with the exception of 49 pedigrees for which only exome sequencing data were generated (see the Boston Early-Onset Chronic Obstructive Pulmonary Disease [EOCOPD] Study samples in the [Web Resources](#)). UW CMG studies were approved by the institutional review boards of the University of Washington, and informed consent was obtained from participants or their parents. The Boston EOCOPD Study participants provided written informed consent, and the Partners HealthCare Human Research Committee approved the study.

IBD estimates for HapMap3 were generated with HapMap3 release 2 data ([Web Resources](#)). We used PLINK to calculate all IBD estimates by using SNPs with a minor allele frequency > 1% and a call rate > 90%. We used PRIMUS to identify the maximum unrelated set for each HapMap3 population and used the allele frequencies from the unrelated samples for the IBD analysis of their own respective populations.

The Starr County Health Studies' Genetics of Diabetes Study is composed of 1,890 affected individuals and representative control samples from a systematic survey conducted in Starr County from 2002 to 2006.<sup>44</sup> However, the types of relationships and potential families in the study are unknown. IBD estimates for the Starr County samples were generated from genotypes called from the Affymetrix Genome-Wide SNP Array 6.0.<sup>44</sup> We used PLINK to calculate all IBD estimates by using SNPs with a minor allele frequency > 1% and a call rate > 90%. We used PRIMUS<sup>37</sup> to identify the maximum unrelated set for the Starr County data and used the allele frequencies from the unrelated samples for the IBD estimations. The Starr County Health Studies' participants provided written informed consent, and the institutional review boards of the University of Texas Health Science Center at Houston approved the study.

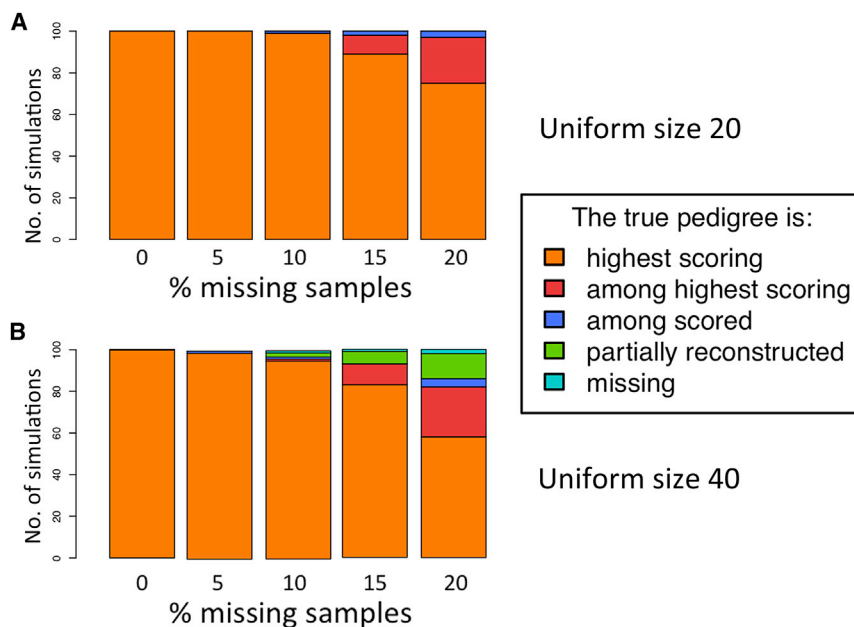

**Figure 1. A Summary of the PRIMUS Reconstructions for 1,000 Simulated Pedigrees**

All simulated uniform size-20 (A) and uniform size-40 (B) pedigrees with up to 20% missing samples were reconstructed with PRIMUS. We ran 100 simulations for each size and percentage of missing samples. For each simulation, we determined where the true pedigree fell among the ranked reconstruction results. Each bar displays the proportion of the 100 simulations corresponding to the five reconstruction outcomes defined as follows: “highest scoring” means that the true pedigree was the highest-scoring pedigree; “among highest scoring” means that PRIMUS output contained more than one possible pedigree and that the true pedigree was tied with one or more other pedigrees for the highest-scoring pedigree; “among scored” indicates that the true pedigree was not the highest-scoring pedigree but was among the pedigrees generated by PRIMUS; “partial reconstruction” means that the complete reconstruction resulted in too many

possible pedigrees, ran out of memory, or took longer than 36 hr to run, and as a result only a partial reconstruction using first-degree relationships was generated; and “missing” indicates that PRIMUS reconstructed one or more possible pedigrees but that the true pedigree was not among them.

### Exome Sequencing Data and Corresponding Pedigrees

The Boston EOCOPD Study<sup>45</sup> (see [Web Resources](#)) is an extended pedigree study of genetic susceptibility to EOCOPD. All available first-degree relatives (siblings, parents, and children), older second-degree relatives (half siblings, aunts, uncles, and grandparents), and other relatives diagnosed with EOCOPD were invited to participate in the study. For this project, 351 subjects from 49 pedigrees were sequenced at the UW CMG.

Exome sequencing was performed with NimbleGen v.2 in-solution hybrid capture and Illumina HiSeq 2000 sequencing,<sup>46</sup> sequences were aligned to the human reference genome (UCSC Genome Browser hg19),<sup>47</sup> and single-nucleotide and insertion-deletion variants were called with the Genome Analysis Toolkit.<sup>48</sup> We used VCFtools<sup>49</sup> to select only PASS SNPs with a minimum and maximum depth of 8× and 300×, respectively, and converted them to PLINK<sup>14</sup>-formatted PED and MAP files. We then calculated IBD estimates in PLINK by using the 56,516 SNPs with a minor allele frequency > 1% and a call rate > 90%. We used a coefficient-of-relatedness cutoff of 0.1 to calculate SNP allele frequencies for the IBD analysis from 81 of the 351 exome-sequenced samples that made up the maximum unrelated set as calculated by PRIMUS.<sup>37</sup>

## Results

### Reconstructing Simulated Pedigrees

To test and evaluate the performance of PRIMUS on a broad range of known pedigrees, we simulated uniform and half-sibling pedigree structures of varying sizes, different numbers of markers, and varying combinations of masked data for individuals in the pedigrees (see [Material and Methods](#) for details). [Figure 1](#) shows the simulation results for reconstruction of size-20 and size-40 uniform

pedigrees with ≤20% missing samples. PRIMUS reconstructed the true pedigree as the only pedigree or the highest-scoring pedigree in 89% of the simulations. For another 5.6% of these simulations, the true pedigree was tied with one other pedigree for the highest-scoring pedigree. Only 2.5% of these simulations failed to run to completion as a result of too many possible pedigrees (>100,000), too long of a runtime (>36 hr), or using too much memory (e.g., exceeding 12 Gb). PRIMUS then reran these incomplete reconstructions with a relatedness cutoff of 0.375 to generate partial reconstructions for each. A partially reconstructed pedigree typically consists of two to six pieces of the larger pedigree in which the individuals are connected by first-degree relationships. It would require connecting these pieces with second- and third-degree relationships to achieve a complete reconstruction of the true pedigree.

Across all of the uniform and half-sibling simulated pedigrees of size 5–50 (~10,000 pedigrees), PRIMUS reconstructed the true pedigree as the highest-scoring or tied-for-highest-scoring pedigree in 88.7% of the simulations ([Table S2](#); [Figure S6](#)). Only 6.3% of all simulations led to partial reconstructions, and PRIMUS completed, but did not reconstruct, the true pedigree in only 0.5% of the simulations. We found that if PRIMUS outputs a single possible pedigree, then that pedigree is the true pedigree in 99.83% of the simulations.

Two trends were seen within the simulation results with respect to the size of the pedigree being reconstructed and the proportion of individuals without genetic data. First, PRIMUS identified the true pedigree as the most likely pedigree in 94.9% of the simulations of pedigrees up to size 20 and up to 20% missing sample data and identified

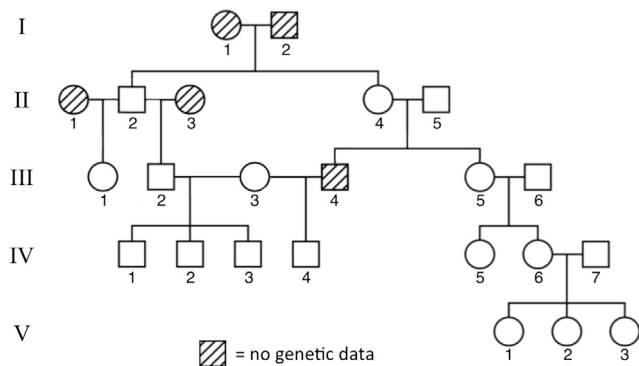

**Figure 2. A UW CMG Pedigree Correctly Reconstructed by PRIMUS in 9 s**

PRIMUS used chip-based genotype data to verify this clinically ascertained pedigree, which included the presence of five individuals for whom no genetic data were available (individuals marked with diagonal lines) and a cycle that occurred because individual III-3 had children with both III-2 and III-4.

the highest-scoring or tied-for-highest-scoring pedigree in 99.4% of the simulations. As the proportion of individuals without genetic data increased to 50%, the true pedigree was more often tied for the highest-scoring pedigree rather than being the highest-scoring pedigree, as expected. Frequently, additional information, such as age, will help rule out many of the tied pedigrees to identify the true pedigree structure.

Second, even with size-50 pedigrees and 20% missing samples, more often than not PRIMUS identified the correct pedigree as the single most likely pedigree. These results can be further improved with greater computational capabilities; PRIMUS tends to produce partial reconstructions as the size of the pedigree increases. For example, compared to size-20 pedigrees with 50% missing samples, size-50 pedigrees with 20% missing samples require more run time (>36 hr) and memory (>12 Gb) to traverse the entire space of possible pedigrees.

Very few simulations completed reconstruction yet failed to find the true pedigree among the possible pedigrees (~0.5%), and their occurrence was not linked to pedigree size or the number of missing samples. This occurs when the initial likelihood threshold is set higher than the likelihood calculated by the KDE for one or more of the relationships in the true pedigree. Running PRIMUS with an initial likelihood threshold of 0.01 would include the true pedigree among the reconstructed pedigrees. As expected, we found that PRIMUS runtime tends to increase exponentially with pedigree size and the amount of missing sample data (Figure S7). Pedigrees up to size 20 and 20% missing samples reconstruct in a matter of seconds.

### Confirming and Correcting Clinically Ascertained Pedigrees

To demonstrate the ability of PRIMUS to verify the genetic information for clinical pedigrees, we reconstructed and confirmed or corrected more than 100 pedigrees submitted

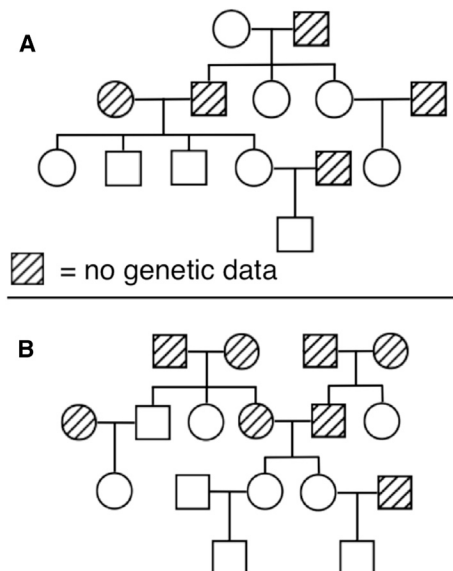

**Figure 3. Two Reported EOCOPD Study Pedigrees Verified by PRIMUS**

(A) This pedigree was the only pedigree generated from PRIMUS. (B) This pedigree was tied with five other pedigrees for the highest-scoring pedigree.

to the UW CMG. The genetic information used by PRIMUS can be either chip-based (Figure 2) or sequence-based (Figures 3 and 4) technologies. Genome-wide IBD estimates for the samples in the pedigree in Figure 2 were generated with genotypes from the HumanCytoSNP BeadChip for each nonmissing sample. PRIMUS used these IBD estimates for all pairs of samples to reconstruct the possible pedigree. Only one pedigree fit the data, and it matched the clinically provided pedigree, supporting our hypothesis that it is the correct pedigree. This reconstruction took 9 s on a 2.3 GHz Intel Core i7 processor. Importantly, PRIMUS also introduced the five missing individuals necessary to connect the final pedigree and correctly identified in the pedigree a cycle that occurred because individual III-3 had children with the two cousins III-2 and III-4 (Figure 2).

Using variant data obtained from exome sequencing generated by the UW CMG, PRIMUS validated 49 pedigrees consisting of 351 individuals ascertained through a proband with severe EOCOPD. The pedigrees range from size 4 with 50% missing samples to size 23 with 35% missing samples. PRIMUS confirmed that 43 of the pedigrees matched the reported pedigrees collected in the study. Among the remaining six pedigrees, PRIMUS found and corrected five nonpaternity errors, one sample swap, and one duplicate sample. These findings were consistent with the corrections independently made by the Boston EOCOPD Study investigators, who compared estimates of IBDs obtained by PLINK with theoretical IBDs obtained with the kinship2 package (Web Resources). Table S4 summarizes the EOCOPD reconstruction and includes size, the number of possible pedigrees, and where the true pedigree ranked in the possible pedigrees.

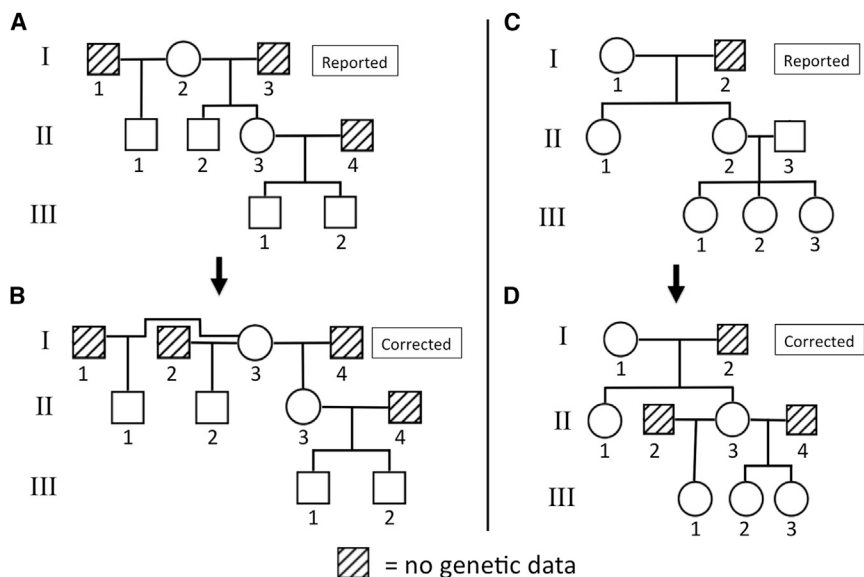

**Figure 4. Two of the Six EOCOPD Study Pedigrees Corrected by PRIMUS**

The reported pedigrees are depicted above (A and C), and the corrected pedigrees are shown below (B and D). Reported pedigree A has a nonpaternity error, so individuals II-2 and II-3 are actually half siblings rather than full siblings in the correct pedigree B. Pedigree B was the top-ranked pedigree in the PRIMUS output. Reported pedigree C contains not only a nonpaternity error that caused individual III-1 to be incorrectly reported as a full sibling of III-2 and III-3 but also a sample swap that caused individual II-3's DNA to be swapped for DNA of an individual from an entirely different pedigree. Corrected pedigree D was the only pedigree generated by PRIMUS. The investigators have independently confirmed the corrected pedigrees.

Figure 3 shows two reported EOCOPD Study pedigrees that were verified by PRIMUS. The pedigree depicted in Figure 3A was the only pedigree generated by PRIMUS, and the pedigree in Figure 3B was among the highest-scoring pedigrees. Figure 4 shows two of the reported pedigrees (Figures 4A and 4C) that were corrected with PRIMUS (Figures 4B and 4D). The pedigree in Figure 4A had a nonpaternity error, so individuals A and B are actually half siblings rather than full siblings (Figure 4B). For the reported pedigree in Figure 4C, PRIMUS not only corrected a nonpaternity error, revealing that individual B is a half sibling of individuals C and D, but also identified a sample swap that caused individual A's DNA to be replaced with DNA from another individual in the data set. This corrected pedigree was the only pedigree generated by PRIMUS for these samples.

### Reconstructing and Incorporating Cryptic Relatedness

To evaluate whether PRIMUS could incorporate cryptic relationships into known pedigrees, we reconstructed pedigrees by using HapMap3 data.<sup>50</sup> Although the HapMap samples were collected to contain trios, duos, and unrelated individuals, cryptic relatedness among these samples is well established.<sup>6,19,29</sup> For example, the ten-person pedigree from individuals of Mexican Ancestry in Los Angeles (MXL; Figure S8) has been manually reconstructed with pairwise relationship predictions by several groups.<sup>15,29,39</sup>

We used PRIMUS to automatically reconstruct all pedigrees within each HapMap3 population, and PRIMUS reconstructed cryptic pedigrees in 9 of the 11 populations (Table S5). PRIMUS confirmed the relationships reported by the HapMap Consortium and the cryptic first- through third-degree relationships reported by Pemberton et al.<sup>29</sup> and Kyriazopoulou-Panagiotopoulou et al.<sup>15</sup> (Table S5). However, because PRIMUS uses all pairwise relationships

up to third-degree relatives to reconstruct the entire pedigree, it can consider each relationship in the context of all others. This enabled our approach to correct one misspecified first-degree and two second-degree relationships reported by Pemberton et al. In addition to making these corrections, PRIMUS was able to increase the specificity of 13 second- and third-degree relationship predictions. For example, Pemberton et al. reported that MKK (Maasai in Kinnyawa, Kenya) individuals NA21312 and NA21370 had an unknown relationships status, but PRIMUS identified them as half siblings. For this pair of individuals, PRIMUS eliminated all other second-degree relationships by using the context of the other pairwise relationships in the pedigree.

PRIMUS also identified 85 previously unreported<sup>15,29</sup> potential third-degree relationships among the HapMap3 samples (Table S5). Although we cannot be certain that these relationships are precise, our results provide strong evidence that relationships do exist and are an improvement over the common assumption that these samples are unrelated. We have made all reconstructed HapMap3 pedigrees available for download on the PRIMUS website (see Web Resources).

### Reconstruction of Previously Unknown Pedigrees from Starr County

We used the Starr County Health Study to demonstrate the ability of PRIMUS to reconstruct previously unknown pedigrees from a large genetic data set. We calculated IBD estimates among all 1,890 samples by using genotypes obtained from the individuals (Affymetrix Genome-Wide SNP Array 6.0<sup>44</sup>). PRIMUS used these estimates to group 458 samples into 203 family networks of two or more samples. Using only these genetic data, PRIMUS reconstructed a single possible pedigree for 120 of these families in less than 4 min, and according to our simulation results, we expect that ~99.83% of these are the true pedigrees. When ages are provided to PRIMUS, it flags pedigrees

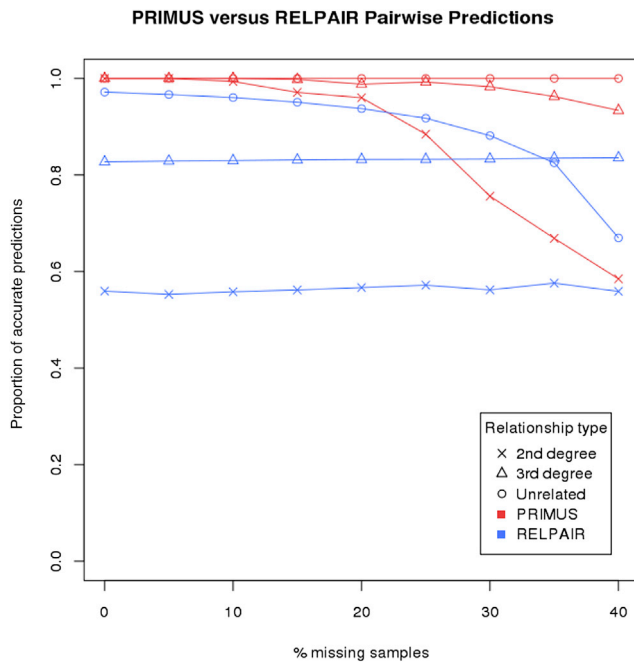

**Figure 5. Relationship-Prediction Accuracies for Simulated Pedigrees with RELPAIR or PRIMUS**

For this comparison, we used half-sibling size-20 pedigrees with 0%–40% missing samples to test pairwise relationship-prediction accuracy. For PRIMUS, we tested whether the relationships in the highest-ranked pedigree matched the true simulated relationships. For RELPAIR, we used the method employed by Pemberton et al.<sup>29</sup> to obtain the prediction and compared that to the true simulated relationship. A second-degree relationship prediction is correct if the predicted relationship type matches the true relationship type. A third-degree relationship prediction is correct if the predicted relationship degree matches the true relationship degree. A distantly and unrelated prediction is correct if the true relationship is more than a third-degree relationship.

that are impossible given the ages of the samples (e.g., when a parent is younger than a child). Using the age information collected for the Starr County Heart Study data set, PRIMUS ruled out these incorrect pedigrees and identified a single possible pedigree for an additional 73 families for a total of 193 pedigrees ranging in size from two to five individuals.

### Comparing PRIMUS to Competing Methods

We compared the results of PRIMUS to those generated by RELPAIR, a program commonly used to check relationships in genetic data. Using the method employed by Pemberton et al.,<sup>29</sup> we compared the accuracy of the pairwise predictions of RELPAIR to the accuracy of the pairwise relationships in the top-ranked reconstructed pedigree produced by PRIMUS (Figure 5; Table S3). Both methods had 100% accuracy when distinguishing between first-degree relationships; however, PRIMUS outperformed RELPAIR when second-degree relationships were considered. Although RELPAIR made the distinction between the first- and second-degree relationships, it labeled all third-degree relationships as cousins. PRIMUS distin-

guished between the four third-degree relationships and also gave directionality to the relationship (e.g., individual II-5 is the great-grandfather of individual V-1 in Figure 2). Therefore, to make a fair comparison between the ability of PRIMUS and RELPAIR to predict third-degree relationships, we compared only the degree of the relationship predicted by PRIMUS to the “cousin” prediction of RELPAIR. PRIMUS outperformed RELPAIR when classifying third-degree and unrelated relationships (Figure 5; Table S3).

We also compared PRIMUS to the latest pedigree-reconstruction programs, PREPARE and IPED2 (see Web Resources). Of the 9,717 simulated pedigrees of size 10–50, only 43 pedigrees had all genotyped samples in a single generation, and all of these pedigrees had at least one half-sibling relationship. Therefore, PREPARE and IPED2 could only attempt to correctly reconstruct <0.5% of the simulated pedigrees; PRIMUS correctly reconstructed 9,008 of the 9,717 (92.7%) simulated pedigrees. Figure S9 shows PRIMUS reconstructions for additional simple, common pedigree structures that PREPARE and IPED2 could not completely reconstruct.

Additionally, neither PREPARE nor IPED2 could completely reconstruct any of the real data presented in this manuscript because all of these pedigrees have genotyped samples from multiple generations. PREPARE and IPED2 provided a partial reconstruction by dropping samples from higher generations and using only extant individuals, as the PREPARE authors did with the MXL pedigree (Figure 14 from Shem-Tov and Halperin,<sup>36</sup> Figure S8). In order to reconstruct relationships, PREPARE requires a priori information about which individuals are in the same generation prior to reconstruction and cannot connect these pairwise relationships into a single, multigenerational pedigree. PRIMUS completely reconstructed these pedigrees (e.g., Figure S8). PREPARE and IPED2 provide limited utility to check reported pedigree structures and to reconstruct previously unknown pedigrees de novo.

## Discussion

PRIMUS is designed to reconstruct nonconsanguineous pedigrees of arbitrary size and structure from pairwise estimates of IBD for samples of up to third-degree relatives. It can also reconstruct some consanguineous pedigrees with children whose parents are third-degree relatives (Figure S10). PRIMUS provides major advancements in reconstructing, testing, and correcting pedigrees. Although pairwise predictions provided by commonly applied programs such as RELPAIR and PREST can test whether two individuals are related at the expected degree of relatedness, they are much weaker at distinguishing between relationship types within the same degree of relatedness (e.g., avuncular versus grandparental) and cannot provide information of the directionality of a relationship (i.e., individual A is the grandparent of B). As a result, they are not able



to detect all pedigree inconsistencies or suggest corrections to pedigrees. Additionally, using pairwise relationships to check pedigrees can result in the unnecessary loss of data (Figure S11) or in accepting an incorrect pedigree as true (Figure S12).

PRIMUS improves on the pairwise predictions by using all the pairwise relationships to reconstruct the pedigree. The context of all the pairwise relationships in the family improves the prediction accuracy of each relationship pair. We have shown that the reconstructed pedigrees obtained by PRIMUS were more accurate than those obtained with RELPAIR (Figure 5; Table S3). In the case of HapMap3, PRIMUS corrected and improved several of the pairwise relationship predictions made by RELPAIR and CARROT (Classification of Relationships with Rotations)<sup>15</sup> (Table S5).

PRIMUS is also a major step forward in comparison to existing pedigree-reconstruction programs given that the existing methods require a small number of markers, completely genotyped pedigrees, no half siblings, and/or that all genotyped samples be in the same generation. For these reasons, no other pedigree-reconstruction program we tested is capable of reconstructing the variety of pedigrees—which represent some of the most common pedigrees found in human genetic studies—we illustrate in this paper.

Importantly, pedigree reconstruction by PRIMUS depends on the quality of the IBD estimates, which are influenced by several factors, including the number of genetic markers, population substructure,<sup>16</sup> admixture,<sup>39</sup> and reference minor allele frequencies.<sup>51</sup> For best results, users should obtain high-quality IBD estimates before reconstructing pedigrees with PRIMUS. IBD estimates can be obtained by PRIMUS or by another program (PLINK,<sup>14</sup> KING,<sup>16</sup> or REAP [Relatedness Estimation in Admixed Populations]<sup>39</sup>) that uses the appropriate allele frequencies for the ancestry of the samples and accounts for potential admixture and population substructure among the data.

We designed PRIMUS to reconstruct up to third-degree relationships for several reasons. First, the distance between the expected mean genome-wide IBD proportions for more distant relationships (e.g., fourth and fifth degrees) is small, and the variation around these means is large. Therefore, the overlap between the distributions of these distant relationships precludes highly accurate relationship assignments of any relationship beyond the third degree. Second, as the relationship distance increases beyond the third degree, the number of possible relationships increases rapidly (Table S6), and pedigree reconstruction quickly becomes computationally challenging. For more distant relationships, it is possible to apply programs such as Beagle<sup>41</sup> and ERSA (Estimation of Recent Shared Ancestry)<sup>18</sup> to connect the PRIMUS-obtained subpedigrees that are distantly related to one another, and we are incorporating this feature in a future release of PRIMUS. Additionally, programs such as RELPAIR<sup>19</sup> could improve the pairwise relationship prediction because they model

recombination events to distinguish between second-degree relationships. The improved relationship predictions could then be used to improve the scoring of possible pedigrees.

We have identified two limitations of PRIMUS and their corresponding remedies. First, because of computational restraints, PRIMUS was unable to complete the reconstruction of 6.3% of simulations with third-degree relatives or closer. The vast majority of these pedigrees had  $\geq 30$  individuals with  $>20\%$  missing sample data. Investigators can still greatly benefit from partial reconstructions of these pedigrees. Users can obtain a partial reconstruction, as we did, by using a higher relatedness threshold to reconstruct with just first- or second-degree relationships. Second, for a very small proportion ( $\sim 0.5\%$ ) of the simulations, PRIMUS did not output the true pedigree among the results because the initial likelihood threshold was set too high. Yet, by lowering the initial likelihood threshold used for predicting familial relationships, PRIMUS was able to reconstruct each of these pedigree structures. Therefore, for a very small percentage of pedigrees run on PRIMUS, it might be necessary to depart from the default initial likelihood threshold to obtain a reported pedigree.

PRIMUS provides an immediate benefit to the genetics community in two ways: pedigree verification and pedigree discovery. Because PRIMUS computationally verifies reported pedigrees by using genotype data and identifies and corrects inconsistencies, PRIMUS saves a significant amount of time and effort that would otherwise be spent on manual verification of pedigrees. This is especially beneficial when large, complex pedigrees—similar to the Boston EOCOPD Study pedigrees—are being studied. For example, PRIMUS has identified and corrected non-paternities, underrelated samples, samples swaps, duplicate samples, and unexpected consanguinity in clinical pedigrees (Figure 4; Figure S10). In many cases, such corrections can result in a correction of the genetic model and assumptions used for downstream analysis, improving the chances of finding the genetic cause of the disease.

Moreover, PRIMUS can reconstruct previously unknown pedigrees by using only genetic data, as demonstrated in the HapMap3 and Starr County data sets. Although, PRIMUS cannot guarantee that these pedigrees are the true pedigrees, the pedigrees can be treated as a hypothesis to be confirmed with supporting independent evidence. This application of PRIMUS is particularly useful in large-scale genetic studies where substantial cryptic relatedness might exist. In the case of the Starr County data, we can now use powerful family-based analyses that leverage the information contained in nearly 200 previously unknown pedigrees.

Incomplete understanding of relatedness structures (i.e., pedigrees) within genetic data can result in a vast array of analytic problems, from dramatically biased effects of rare variants to complete power loss in pedigree-based

methods. With the introduction of PRIMUS, we hope to address many of the limitations of prior pedigree-reconstruction frameworks and pairwise comparison algorithms in a fast, tractable, and easy-to-use algorithm, enabling investigators to better assess the information present within their data.

## Supplemental Data

Supplemental Data include 12 figures and 6 tables and can be found with this article online at <http://dx.doi.org/10.1016/j.ajhg.2014.10.005>.

## Acknowledgments

Andrew Stayart, Chad Huff, William Noble, Bruce Weir, Elizabeth Thompson, Jean Morrison, Brian Browning, Jay Shendure, David Dale, Kevin Boehme, Christa Poel, Colleen Davis, and Timothy Thornton provided helpful discussion and input. We'd like to thank Craig L. Hanis and the investigators and staff of the Starr County Health Studies (grants DK073541 and DK085501) and the University of Washington Center for Mendelian Genomics (UW CMG; HG006493). Sequencing was provided by the UW CMG and was funded by National Human Genome Research Institute (NHGRI) and NHLBI grant 1U54HG006493 to D.A.N., Jay Shendure, and Michael Bamshad. J.S. is supported by the National Science Foundation Graduate Research Fellowship under grant DGE-0718124. Support for D.A.N. and J.E.B. was provided by NHGRI and NHLBI grant HG006493. The Boston Early-Onset Chronic Obstructive Pulmonary Disease Study, D.Q., M.H.C., and E.K.S. are supported by NHLBI grant R01 HL113264. In the past 3 years, E.K.S. received honoraria and consulting fees from Merck and grant support and consulting fees from GlaxoSmithKline.

Received: July 14, 2014

Accepted: October 2, 2014

Published: October 30, 2014

## Web Resources

The URLs for data presented herein are as follows:

Boston Early-Onset COPD Study, <http://bostoncopd.org>  
CraneFoot, <http://www.finndiane.fi/software/cranefoot/>  
International HapMap Project, <http://hapmap.ncbi.nlm.nih.gov>  
IPED2, <http://www.cs.ucla.edu/~danhe/Software/IPED2.html>  
kinship2, <http://cran.r-project.org/package=kinship2>  
PRIMUS, <http://primus.gs.washington.edu>  
PRIMUS simulations, the link to the code used for generating simulations, and the reconstructed HapMap3 pedigrees, <http://sourceforge.net/projects/primus-beta/files/>  
SciPy, <http://www.scipy.org>

## References

1. Santorico, S.A., and Edwards, K.L. (2014). Challenges of linkage analysis in the era of whole-genome sequencing. *Genet. Epidemiol.* 38 (Suppl 1), S92–S96.
2. Ott, J., Kamatani, Y., and Lathrop, M. (2011). Family-based designs for genome-wide association studies. *Nat. Rev. Genet.* 12, 465–474.
3. Hu, H., Roach, J.C., Coon, H., Guthery, S.L., Voelkerding, K.V., Margraf, R.L., Durtschi, J.D., Tavtigian, S.V., Shankaracharya, Wu, W., et al. (2014). A unified test of linkage analysis and rare-variant association for analysis of pedigree sequence data. *Nat. Biotechnol.* 32, 663–669.
4. McMillin, M.J., Below, J.E., Shively, K.M., Beck, A.E., Gilderleeve, H.I., Pinner, J., Gogola, G.R., Hecht, J.T., Grange, D.K., Harris, D.J., et al.; University of Washington Center for Mendelian Genomics (2013). Mutations in ECEL1 cause distal arthrogyriposis type 5D. *Am. J. Hum. Genet.* 92, 150–156.
5. Below, J.E., Earl, D.L., Shively, K.M., McMillin, M.J., Smith, J.D., Turner, E.H., Stephan, M.J., Al-Gazali, L.I., Hertecant, J.L., Chitayat, D., et al.; University of Washington Center for Mendelian Genomics (2013). Whole-genome analysis reveals that mutations in inositol polyphosphate phosphatase-like 1 cause opsismodysplasia. *Am. J. Hum. Genet.* 92, 137–143.
6. Li, B., Krakow, D., Nickerson, D.A., Bamshad, M.J., Chang, Y., Lachman, R.S., Yilmaz, A., Kayserili, H., and Cohn, D.H.; University of Washington Center for Mendelian Genomics (2014). Opsismodysplasia resulting from an insertion mutation in the SH2 domain, which destabilizes INPPL1. *Am. J. Med. Genet. A.* 164A, 2407–2411.
7. Makaryan, V., Rosenthal, E.A., Bolyard, A.A., Kelley, M.L., Below, J.E., Bamshad, M.J., Bofferding, K.M., Smith, J.D., Buckingham, K., Boxer, L.A., et al.; UW Center for Mendelian Genomics (2014). TCIRG1-associated congenital neutropenia. *Hum. Mutat.* 35, 824–827.
8. Voight, B.F., and Pritchard, J.K. (2005). Confounding from cryptic relatedness in case-control association studies. *PLoS Genet.* 1, e32.
9. Day-Williams, A.G., Blangero, J., Dyer, T.D., Lange, K., and Sobel, E.M. (2011). Linkage analysis without defined pedigrees. *Genet. Epidemiol.* 35, 360–370.
10. Boehnke, M., and Cox, N.J. (1997). Accurate inference of relationships in sib-pair linkage studies. *Am. J. Hum. Genet.* 61, 423–429.
11. Bellis, M.A., Hughes, K., Hughes, S., and Ashton, J.R. (2005). Measuring paternal discrepancy and its public health consequences. *J. Epidemiol. Community Health* 59, 749–754.
12. Kerr, S.M., Campbell, A., Murphy, L., Hayward, C., Jackson, C., Wain, L.V., Tobin, M.D., Dominiczak, A., Morris, A., Smith, B.H., and Porteous, D.J. (2013). Pedigree and genotyping quality analyses of over 10,000 DNA samples from the Generation Scotland: Scottish Family Health Study. *BMC Med. Genet.* 14, 38.
13. Wolf, M., Musch, J., Enczmann, J., and Fischer, J. (2012). Estimating the prevalence of nonpaternity in Germany. *Hum. Nat.* 23, 208–217.
14. Purcell, S., Neale, B., Todd-Brown, K., Thomas, L., Ferreira, M.A., Bender, D., Maller, J., Sklar, P., de Bakker, P.I., Daly, M.J., and Sham, P.C. (2007). PLINK: a tool set for whole-genome association and population-based linkage analyses. *Am. J. Hum. Genet.* 81, 559–575.
15. Kyriazopoulou-Panagiotopoulou, S., Kashef Haghghi, D., Aerni, S.J., Sundquist, A., Bercovici, S., and Batzoglu, S. (2011). Reconstruction of genealogical relationships with applications to Phase III of HapMap. *Bioinformatics* 27, i333–i341.
16. Manichaikul, A., Mychaleckyj, J.C., Rich, S.S., Daly, K., Sale, M., and Chen, W.M. (2010). Robust relationship inference in genome-wide association studies. *Bioinformatics* 26, 2867–2873.

17. Abecasis, G.R., Cherny, S.S., Cookson, W.O.C., and Cardon, L.R. (2001). GRR: graphical representation of relationship errors. *Bioinformatics* 17, 742–743.
18. Huff, C.D., Witherspoon, D.J., Simonson, T.S., Xing, J.C., Watkins, W.S., Zhang, Y.H., Tuohy, T.M., Neklason, D.W., Burt, R.W., Guthery, S.L., et al. (2011). Maximum-likelihood estimation of recent shared ancestry (ERSA). *Genome Res.* 21, 768–774.
19. Epstein, M.P., Duren, W.L., and Boehnke, M. (2000). Improved inference of relationship for pairs of individuals. *Am. J. Hum. Genet.* 67, 1219–1231.
20. Sun, L., Wilder, K., and McPeck, M.S. (2002). Enhanced pedigree error detection. *Hum. Hered.* 54, 99–110.
21. Nijmeijer, J.S., Arias-Vásquez, A., Rommelse, N.N., Altink, M.E., Buschgens, C.J., Fliers, E.A., Franke, B., Minderaa, R.B., Sergeant, J.A., Buitelaar, J.K., et al. (2014). Quantitative linkage for autism spectrum disorders symptoms in attention-deficit/hyperactivity disorder: significant locus on chromosome 7q11. *J. Autism Dev. Disord.* 44, 1671–1680.
22. Chen, C.T., Liu, C.T., Chen, G.K., Andrews, J.S., Arnold, A.M., Dreyfus, J., Franceschini, N., Garcia, M.E., Kerr, K.F., Li, G., et al. (2014). Meta-analysis of loci associated with age at natural menopause in African-American women. *Hum. Mol. Genet.* 23, 3327–3342.
23. Lange, L.A., Hu, Y., Zhang, H., Xue, C., Schmidt, E.M., Tang, Z.Z., Bizon, C., Lange, E.M., Smith, J.D., Turner, E.H., et al.; NHLBI Grand Opportunity Exome Sequencing Project (2014). Whole-exome sequencing identifies rare and low-frequency coding variants associated with LDL cholesterol. *Am. J. Hum. Genet.* 94, 233–245.
24. Bella, J.N., Cole, S.A., Laston, S., Almasy, L., Comuzzie, A., Lee, E.T., Best, L.G., Fabsitz, R.R., Howard, B.V., Maccluer, J.W., et al. (2013). Genome-wide linkage analysis of carotid artery lumen diameter: the strong heart family study. *Int. J. Cardiol.* 168, 3902–3908.
25. Bizon, C., Spiegel, M., Chasse, S.A., Gizer, I.R., Li, Y., Malc, E.P., Mieczkowski, P.A., Sailsbery, J.K., Wang, X., Ehlers, C.L., and Wilhelmsen, K.C. (2014). Variant calling in low-coverage whole genome sequencing of a Native American population sample. *BMC Genomics* 15, 85.
26. Quillen, E.E., Chen, X.D., Almasy, L., Yang, F., He, H., Li, X., Wang, X.Y., Liu, T.Q., Hao, W., Deng, H.W., et al. (2014). ALDH2 is associated to alcohol dependence and is the major genetic determinant of “daily maximum drinks” in a GWAS study of an isolated rural chinese sample. *Am. J. Med. Genet. B. Neuropsychiatr. Genet.* 165B, 103–110.
27. Zhu, Y., Voruganti, V.S., Lin, J., Matsuguchi, T., Blackburn, E., Best, L.G., Lee, E.T., MacCluer, J.W., Cole, S.A., and Zhao, J. (2013). QTL mapping of leukocyte telomere length in American Indians: the Strong Heart Family Study. *Aging (Albany, N.Y. Online)* 5, 704–716.
28. Nolan, D., Kraus, W.E., Hauser, E., Li, Y.J., Thompson, D.K., Johnson, J., Chen, H.C., Nelson, S., Haynes, C., Gregory, S.G., et al. (2013). Genome-wide linkage analysis of cardiovascular disease biomarkers in a large, multigenerational family. *PLoS ONE* 8, e71779.
29. Pemberton, T.J., Wang, C., Li, J.Z., and Rosenberg, N.A. (2010). Inference of unexpected genetic relatedness among individuals in HapMap Phase III. *Am. J. Hum. Genet.* 87, 457–464.
30. Riester, M., Stadler, P.F., and Klemm, K. (2009). FRANz: reconstruction of wild multi-generation pedigrees. *Bioinformatics* 25, 2134–2139.
31. Hadfield, J.D., Richardson, D.S., and Burke, T. (2006). Towards unbiased parentage assignment: combining genetic, behavioural and spatial data in a Bayesian framework. *Mol. Ecol.* 15, 3715–3730.
32. Marshall, T.C., Slate, J., Kruuk, L.E.B., and Pemberton, J.M. (1998). Statistical confidence for likelihood-based paternity inference in natural populations. *Mol. Ecol.* 7, 639–655.
33. Cussens, J., Bartlett, M., Jones, E.M., and Sheehan, N.A. (2013). Maximum likelihood pedigree reconstruction using integer linear programming. *Genet. Epidemiol.* 37, 69–83.
34. He, D., Wang, Z., Han, B., Parida, L., and Eskin, E. (2013). IPED: inheritance path-based pedigree reconstruction algorithm using genotype data. *J. Comput. Biol.* 20, 780–791.
35. Kirkpatrick, B., Li, S.C., Karp, R.M., and Halperin, E. (2011). Pedigree reconstruction using identity by descent. *J. Comput. Biol.* 18, 1481–1493.
36. Shem-Tov, D., and Halperin, E. (2014). Historical pedigree reconstruction from extant populations using PPartitioning of Relatives (PREPARE). *PLoS Comput. Biol.* 10, e1003610.
37. Staples, J., Nickerson, D.A., and Below, J.E. (2013). Utilizing graph theory to select the largest set of unrelated individuals for genetic analysis. *Genet. Epidemiol.* 37, 136–141.
38. Morrison, J. (2013). Characterization and correction of error in genome-wide IBD estimation for samples with population structure. *Genet. Epidemiol.* 37, 635–641.
39. Thornton, T., Tang, H., Hoffmann, T.J., Ochs-Balcom, H.M., Caan, B.J., and Risch, N. (2012). Estimating kinship in admixed populations. *Am. J. Hum. Genet.* 91, 122–138.
40. Abecasis, G.R., Cherny, S.S., Cookson, W.O., and Cardon, L.R. (2002). Merlin—rapid analysis of dense genetic maps using sparse gene flow trees. *Nat. Genet.* 30, 97–101.
41. Browning, B.L., and Browning, S.R. (2011). A fast, powerful method for detecting identity by descent. *Am. J. Hum. Genet.* 88, 173–182.
42. Hill, W.G., and Weir, B.S. (2011). Variation in actual relationship as a consequence of Mendelian sampling and linkage. *Genet. Res.* 93, 47–64.
43. Mäkinen, V.P., Parkkonen, M., Wessman, M., Groop, P.H., Kanninen, T., and Kaski, K. (2005). High-throughput pedigree drawing. *Eur. J. Hum. Genet.* 13, 987–989.
44. Below, J.E., Gamazon, E.R., Morrison, J.V., Konkashbaev, A., Pluzhnikov, A., McKeigue, P.M., Parra, E.J., Elbein, S.C., Hallman, D.M., Nicolae, D.L., et al. (2011). Genome-wide association and meta-analysis in populations from Starr County, Texas, and Mexico City identify type 2 diabetes susceptibility loci and enrichment for expression quantitative trait loci in top signals. *Diabetologia* 54, 2047–2055.
45. Silverman, E.K., Chapman, H.A., Drazen, J.M., Weiss, S.T., Rosner, B., Campbell, E.J., O'Donnell, W.J., Reilly, J.J., Ginns, L., Mentzer, S., et al. (1998). Genetic epidemiology of severe, early-onset chronic obstructive pulmonary disease. Risk to relatives for airflow obstruction and chronic bronchitis. *Am. J. Respir. Crit. Care Med.* 157, 1770–1778.
46. Fu, W., O'Connor, T.D., Jun, G., Kang, H.M., Abecasis, G., Leal, S.M., Gabriel, S., Rieder, M.J., Altshuler, D., Shendure, J., et al.; NHLBI Exome Sequencing Project (2013). Analysis of 6,515 exomes reveals the recent origin of most human protein-coding variants. *Nature* 493, 216–220.
47. Li, H., and Durbin, R. (2009). Fast and accurate short read alignment with Burrows-Wheeler transform. *Bioinformatics* 25, 1754–1760.

48. McKenna, A., Hanna, M., Banks, E., Sivachenko, A., Cibulskis, K., Kernytsky, A., Garimella, K., Altshuler, D., Gabriel, S., Daly, M., and DePristo, M.A. (2010). The Genome Analysis Toolkit: a MapReduce framework for analyzing next-generation DNA sequencing data. *Genome Res.* *20*, 1297–1303.
49. Danecek, P., Auton, A., Abecasis, G., Albers, C.A., Banks, E., DePristo, M.A., Handsaker, R.E., Lunter, G., Marth, G.T., Sherry, S.T., et al.; 1000 Genomes Project Analysis Group (2011). The variant call format and VCFtools. *Bioinformatics* *27*, 2156–2158.
50. Altshuler, D.M., Gibbs, R.A., Peltonen, L., Altshuler, D.M., Gibbs, R.A., Peltonen, L., Dermitzakis, E., Schaffner, S.F., Yu, F., Peltonen, L., et al.; International HapMap 3 Consortium (2010). Integrating common and rare genetic variation in diverse human populations. *Nature* *467*, 52–58.
51. Cross, D.S., Ivacic, L.C., Stefanski, E.L., and McCarty, C.A. (2010). Population based allele frequencies of disease associated polymorphisms in the Personalized Medicine Research Project. *BMC Genet.* *11*, 51.

The American Journal of Human Genetics, Volume 95

Supplemental Data

## **PRIMUS: Rapid Reconstruction of Pedigrees**

### **from Genome-Wide Estimates of Identity by Descent**

Jeffrey Staples, Dandi Qiao, Michael H. Cho, Edwin K. Silverman, University of Washington Center for Mendelian Genomics, Deborah A. Nickerson, and Jennifer E.

Below

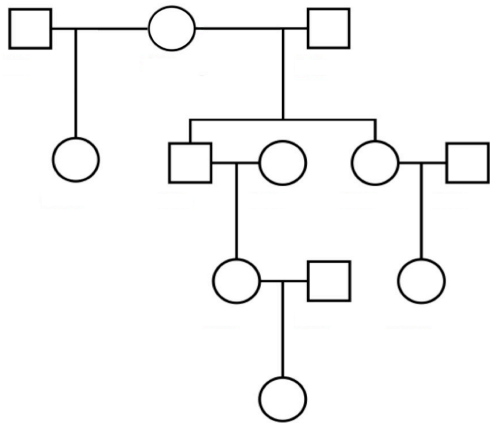

**Figure S1.** Schematic of a simulated 12-person pedigree. This pedigree contains all types of familial relationships shown in Table 1. We randomly assigned HapMap3 CEU haplotypes to each of the founders and then simulated recombination events to propagate these genotypes to the children.

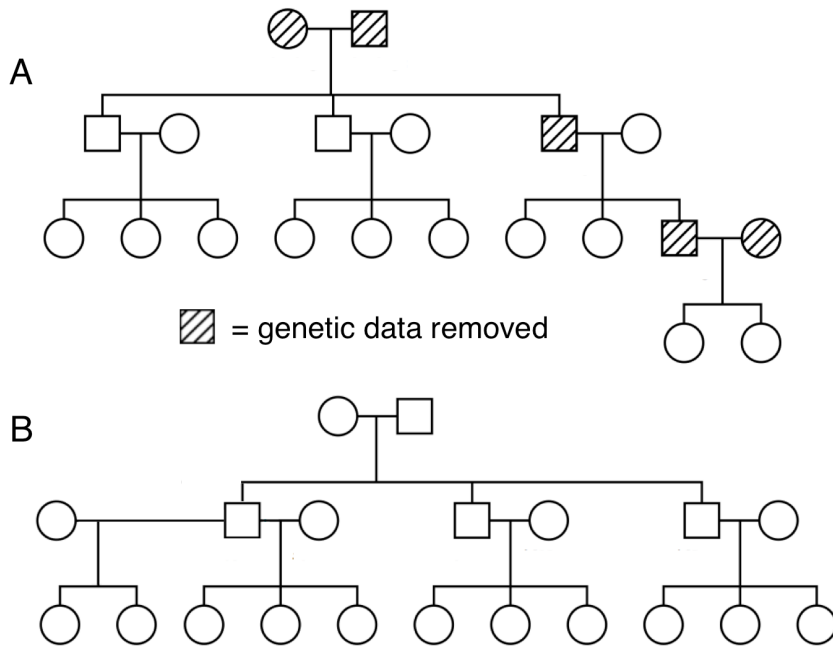

**Figure S2.** Examples of simulated pedigrees of size 20. A) Uniform size-20 pedigree with five samples for whom the genetic data was removed. The missing individuals simulated the real world case where you cannot get good genotypes from an individual either due to lack of consent, poor DNA quality, contamination, or absence of the individual. All of the remaining individuals are genotyped and are included in the pedigree and the reconstruction. B) Halfsib size-20 pedigree without any missing individuals.

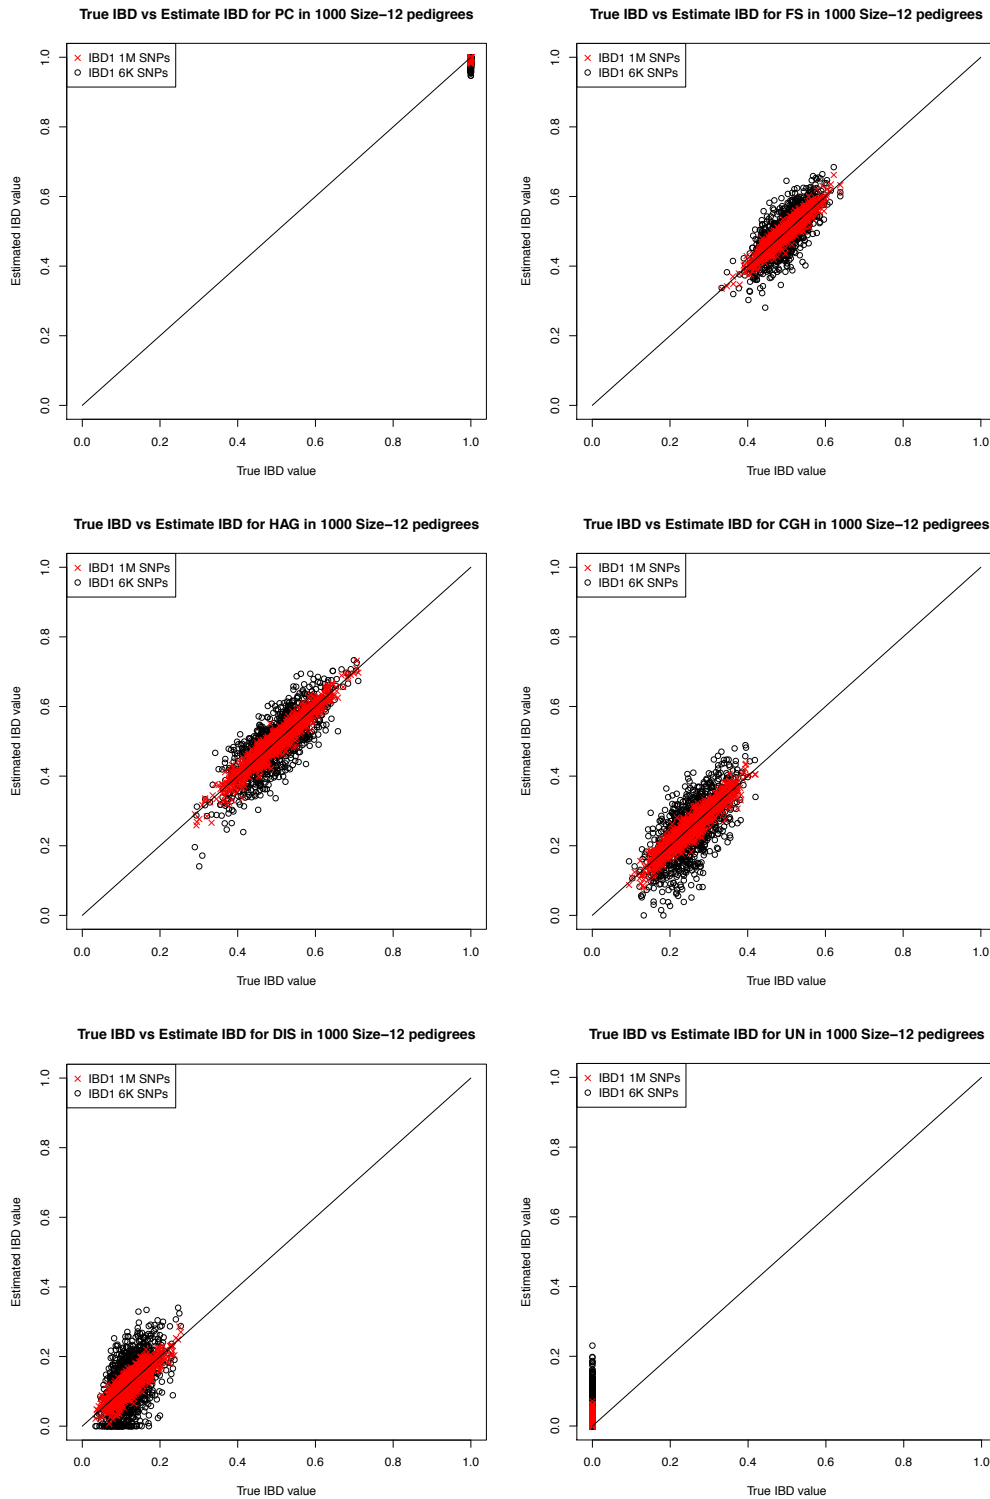

**Figure S3.** Comparison of the true IBD1 value to the PLINK IBD1 estimates for relationship sampled from 1000 size-12 pedigrees. Each graph shows the comparison of 6K SNPs and 1 million SNPs to the true IBD value. Each plot shows a different relationship category. IBD estimates generated from 6K SNPs have a much wider variance than the one IBD estimates generated from 1M SNPs. However, the distance that they depart from the expected value appears to remain fairly constant at each degree of relatedness.

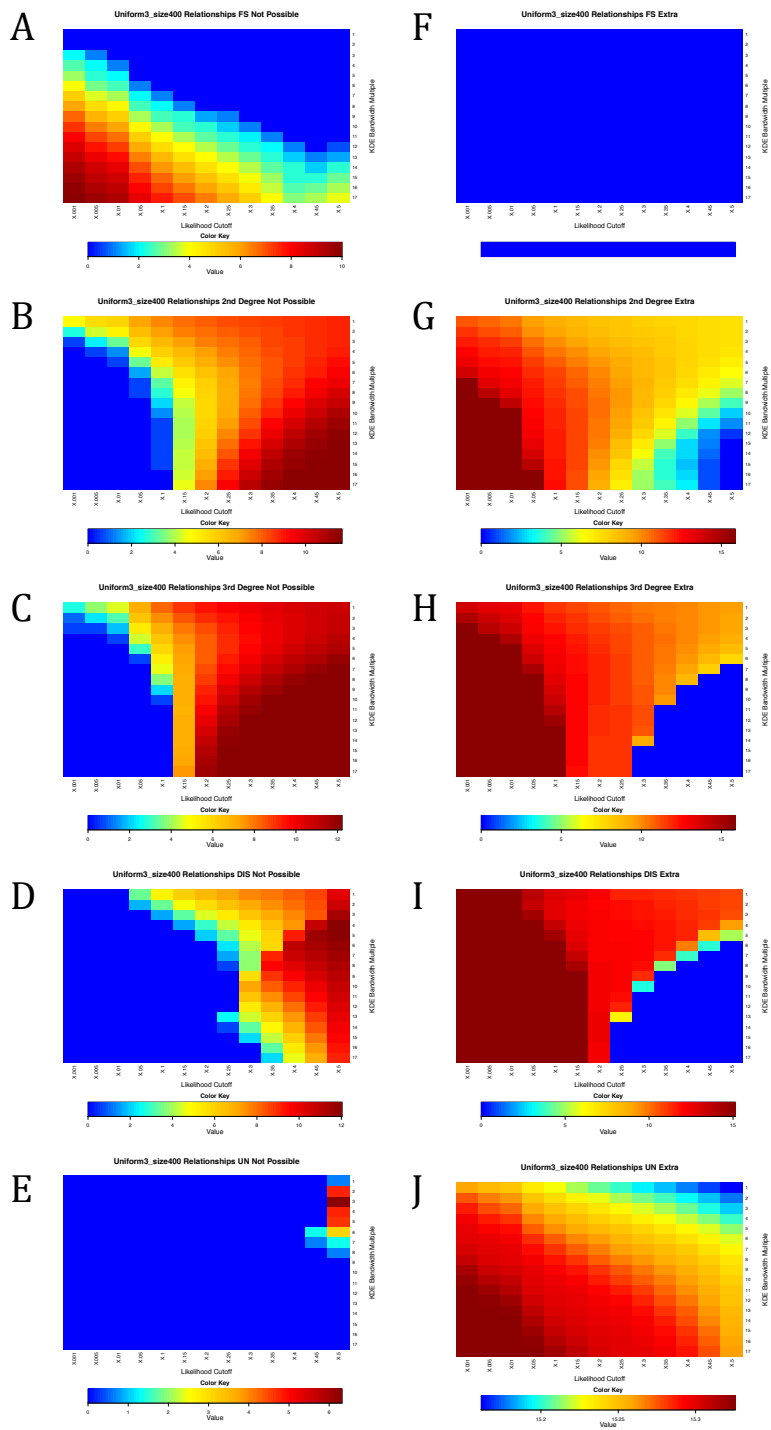

**Figure S4.** False positive (FP) and false negative (FN) relationship predictions with different KDE bandwidths and likelihood cutoffs for full-sibling (FS), 2<sup>nd</sup> degree, 3<sup>rd</sup> degree, distant (DIS) and unrelated (UN) relationships. We used these predictions to optimize the ability of PRIMUS to accurately identify the relationship between two individuals (true positive = 1 - FN) while minimizing the number of incorrect relationships that it predicts (FP). Since the optimal bandwidth would need to perform well across different likelihood cutoffs, we tested the performance of PRIMUS with likelihood cutoffs ranging from 0.01 to 0.5. We used the `scipy.stats.gaussian_kde` function (Web Resources) with two training features: genome-wide estimates of IBD0 and IBD1. We tested a range of bandwidths by specifying scalar values 1 through 17 as the “`bw_method`” option and these values are used as the



coefficient that multiplies the data covariance matrix to obtain the kernel covariance matrix. With KDEs trained at each bandwidth coefficient value from 1 to 17, we predicted the relationship category of each relationship in the 100 Uniform size-400 pedigrees at likelihood cutoffs varying from 0.01 to 0.5. We evaluated the relationship prediction of the KDEs trained with different bandwidths by testing their FN (results A-E) and FP (results F-J) rates. The color in each cell indicates the number of relationships from the 100 size-400 Uniform pedigrees that were either FN or FP. The color scale is  $\log_{10}$ . An FN occurs if the true relationship did not have a likelihood higher than the cutoff. An FP occurs if a relationship other than the true relationship has a likelihood higher than the likelihood cutoff. Parent-offspring relationships did not have any FP or FN predictions, so the corresponding heat maps are not shown. We selected the covariance factor for each relationship category that minimized the FP and FN predictions, and these are set as the default in PRIMUS: PO = 17; FS = 2; 2<sup>nd</sup> degree = 6; 3<sup>rd</sup> degree=5; DIS = 2; UN = 1. With an initial likelihood threshold higher than 0.3, we found a higher rate of false negative relationship predictions for 2<sup>nd</sup> degree, 3<sup>rd</sup> degree, and distantly related relationships in the Uniform size-400 pedigrees (Figure S3). However, lowering this threshold results in more relationships with likelihood scores that exceed the threshold. If there is more than one relationship category that exceeds the likelihood threshold, then PRIMUS will attempt to reconstruct a different version of the pedigree for each possible relationship, resulting in additional computational time. Therefore, we desired a default threshold that was lenient enough to reduce the chance of a false negative prediction, but also stringent enough to minimize the number of false positive relationships that are tested in the reconstruction. We chose 0.01 as the lower likelihood threshold bound because all relationship categories had 0% false negative rate at this threshold for their selected bandwidth. The strategy for the automatically lowering threshold is designed to capture the true pedigree while minimizing the runtime and the number of possible false positive pedigrees. This strategy assumes that PRIMUS will not output a pedigree structure until all true relationships have a likelihood higher than the likelihood threshold, and, thus, it will be able to reconstruct the true pedigree structure. There are rare scenarios (~0.5% of the simulations, Table S2) where PRIMUS did not output a correct pedigree structure before the threshold was low enough to correctly predict all familial relationships. Therefore, in this rare scenario, the true pedigree structure was not among the PRIMUS results. In these instances, PRIMUS can generate the true pedigree structure if the likelihood threshold is initially set low enough (e.g., 0.01). We chose 0.3 as the default because it provides the greatest savings in runtime and reduced number of possible pedigrees for the common uses of PRIMUS, but users can select a different value to fit their custom needs.

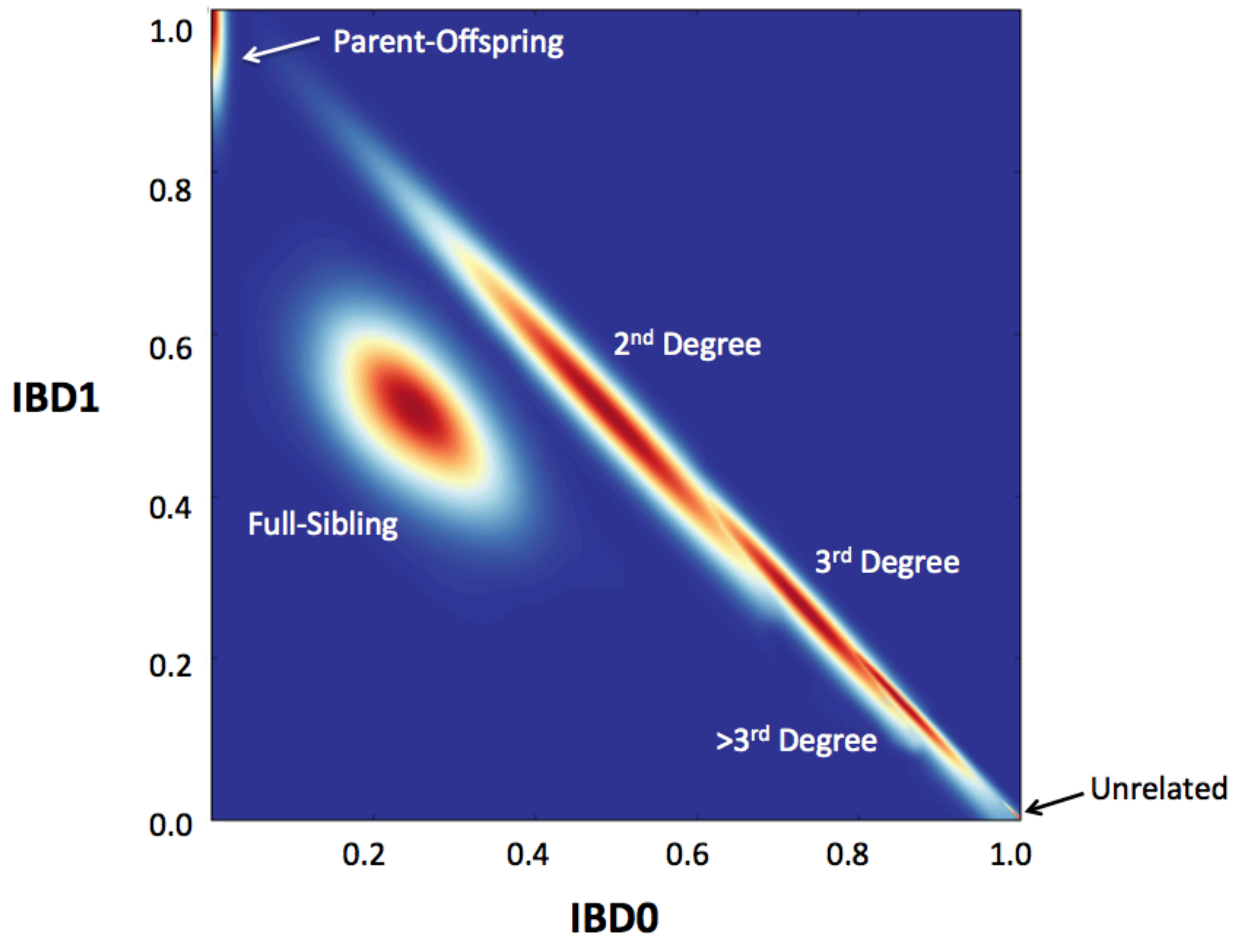

**Figure S5.** Kernel density distributions of the trained kernel density estimates for each familial relationship category. Parent-offspring and full-sibling are viably separated from the other density clusters. 2<sup>nd</sup> Degree and 3<sup>rd</sup> Degree are labeling the distribution of IBD estimates for 2<sup>nd</sup> and 3<sup>rd</sup> degree relationships, respectively. >3<sup>rd</sup> degree and “Unrelated” label the distributions of IBD estimates for relatives more distant than 3<sup>rd</sup> degree or unrelated, respectively.

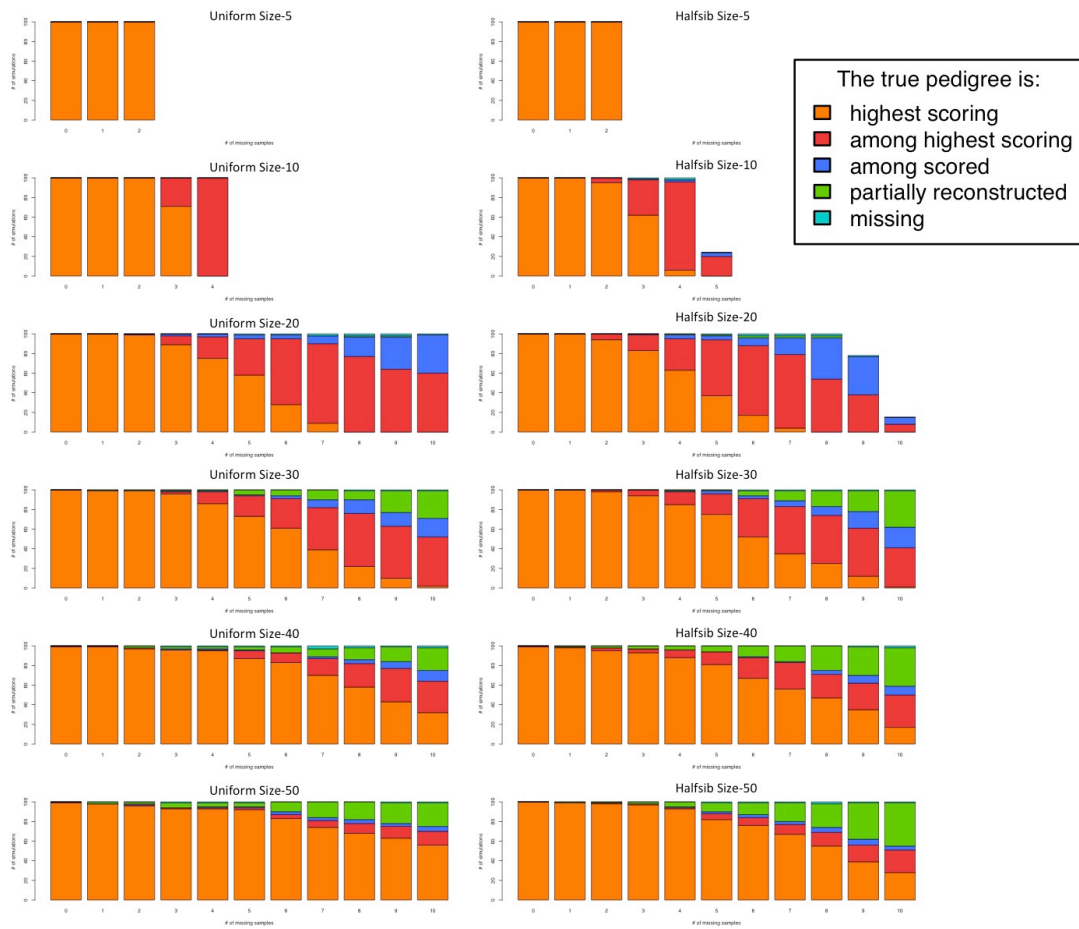

**Figure S6.** Results from the reconstruction of simulated pedigrees. We simulated 100 pedigrees for each size from five to 50 and for both Uniform and Halfsib pedigree structures. We removed up to ten samples from each pedigree and reconstructed each in PRIMUS. For each simulation we determined where the true pedigree fell among the ranked reconstruction results. Each bar displays the proportion of the 100 simulations that corresponded to the five reconstruction outcomes. Some of the Halfsib pedigree structures allowed for more samples to be removed than others due to the random nature of how they were simulated. As a result, Halfsib size-10 with five missing samples and size-20 with nine and ten missing samples do not have 100 unique simulations. The different outcomes are defined as follows:

**“highest scoring”** – The true pedigree is the highest scoring pedigree

**“among highest scoring”** – PRIMUS output contained more than one possible pedigree, and the true pedigree is tied as the highest scoring pedigree with one or more other pedigrees

**“among scored”** – the true pedigree is not the highest scoring pedigree, but is among the pedigrees generated by PRIMUS

**“partial reconstruction”** – the complete reconstruction either resulted in too many possible pedigrees, ran out of memory, or took longer than 36 hours to run, and, as a result, only a partial reconstruction using 1<sup>st</sup> degree relationships was generated

**“missing”** – PRIMUS reconstructed one or more possible pedigrees, but the true pedigree was not among them

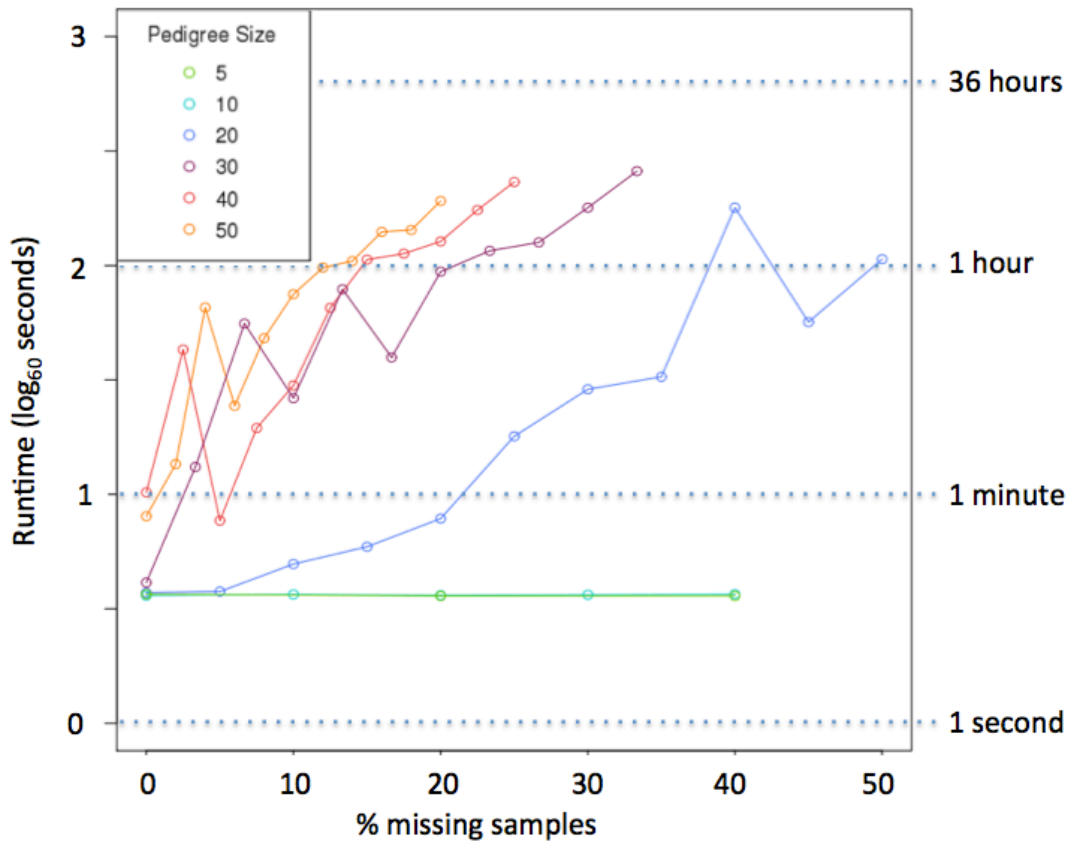

**Figure S7.** Simulation runtime results. These simulations were run on a single Intel Xeon CPU X5690 @ 3.47GHz with up to 35GB of RAM.

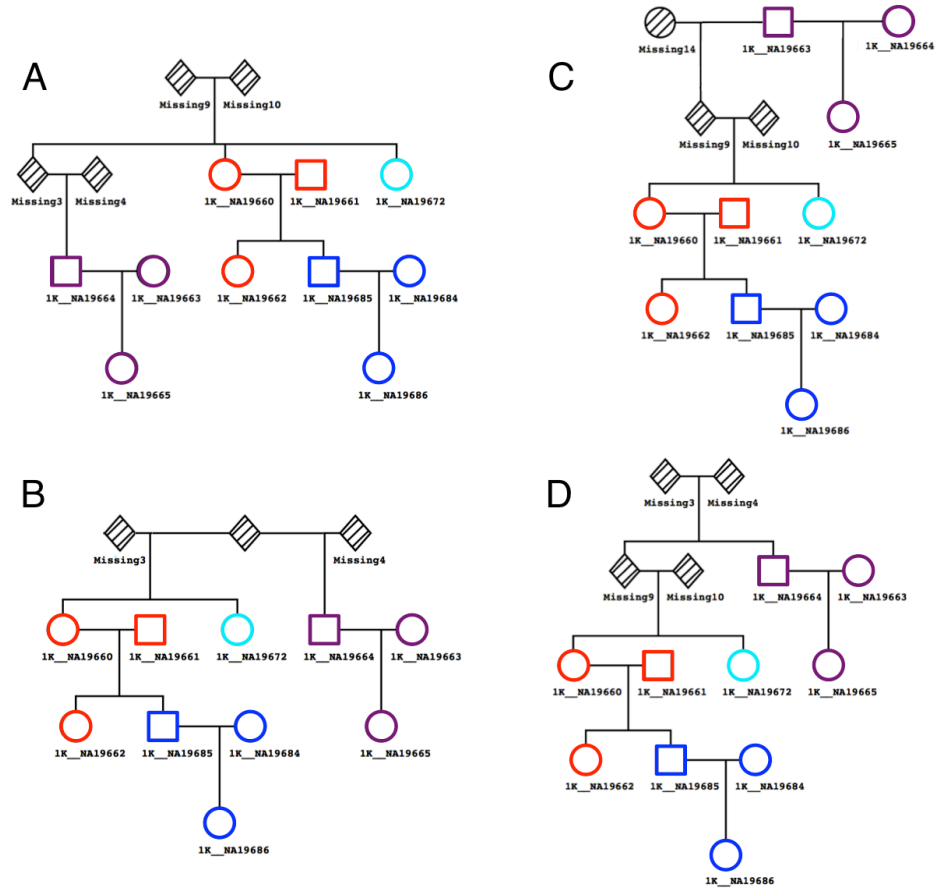

**Figure S8.** A ten-person MapMap3 MXL pedigree obtained from the HapMap3 and 1000 Genomes samples. The pedigree includes three reported trios (each colored differently) from HapMap3 and an additional individual from the 1000 Genomes Project. The pedigree shown in A is one of four possible pedigrees that fit the estimated IBD proportions and is the pedigree previously reported<sup>1</sup>. Alternative possible pedigrees that fit the genetic data are shown in B, C, and D. For these MXL samples, PREPARE reported a single sibling relationship (NA19662, NA19685), the two first-cousin relationships (NA19662-NA19664 and NA19664-NA19685). PREPARE is presented to have automatically reconstructed the nine-person HapMap3 MXL pedigree reported in the CARROT paper<sup>1</sup>, but they only show that NA19686 (incorrectly labeled as NA19685 in Figure 14 of their paper<sup>2</sup>) and NA19665 are 2<sup>nd</sup> cousins. Unlike the PRIMUS automatic reconstruction (Figure S8), they do not show how the other eight individuals fit into the pedigree, nor do they acknowledge that there are four different pedigree structures that fit the genetic data.

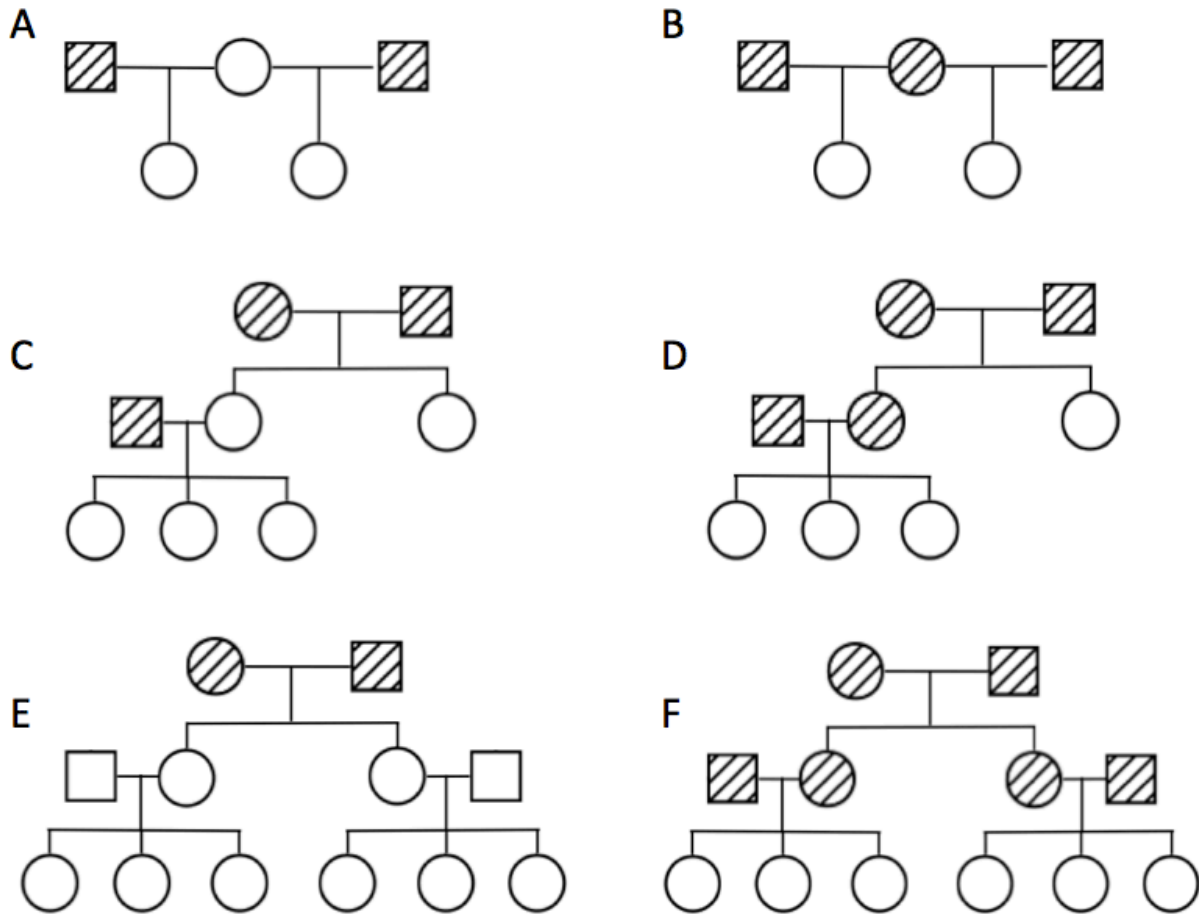

Figure S9. Examples of simple and common pedigrees structures. Diagonal lines through an individual's symbol indicate that DNA data are unavailable for that individual. PRIMUS can easily reconstruct all six pedigree structures. PREPARE<sup>2</sup> and IPED2 (He *et al.*, in press) can reconstruct pedigrees B and F because they require that all genotyped samples be in the same generation. If we had prior knowledge of each of these pedigrees, ages of the samples, or knowledge of who was in which generation, then PREPARE and IPED2 could do partial reconstructions of the lowest generation of each pedigree and the middle generation of C by discarding the other genotyped individuals. IPED<sup>3</sup> and COP/CIP<sup>4</sup> can only reconstruct pedigree F, because they are unable to handle half-sibling relationships, but could do the same partial reconstruction of the same pedigrees as PREPARE and IPED, except for A.

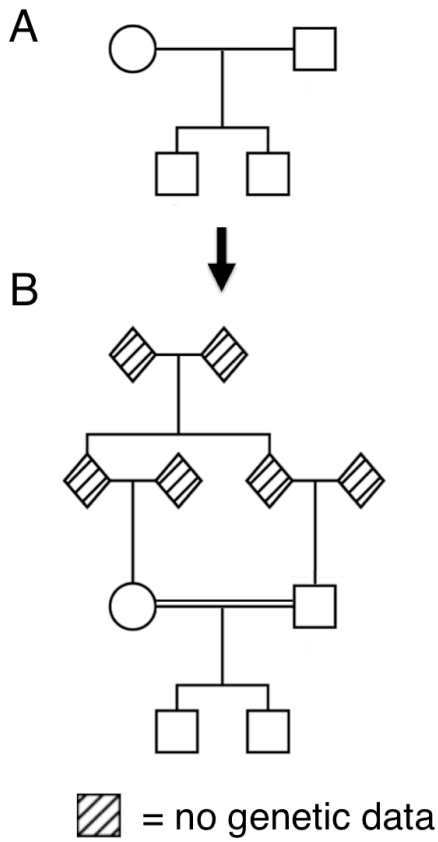

**Figure S10.** A pedigree submitted to the UW Center for Mendelian Genomics. The parents were reported as unrelated individuals by the clinician as depicted in pedigree A, but PRIMUS reconstructed them as first cousins, as depicted in pedigree B.

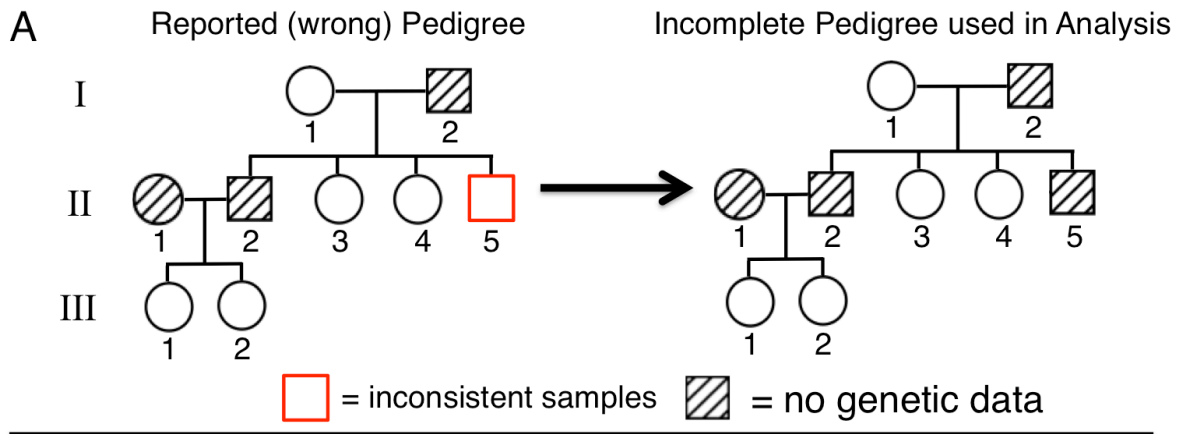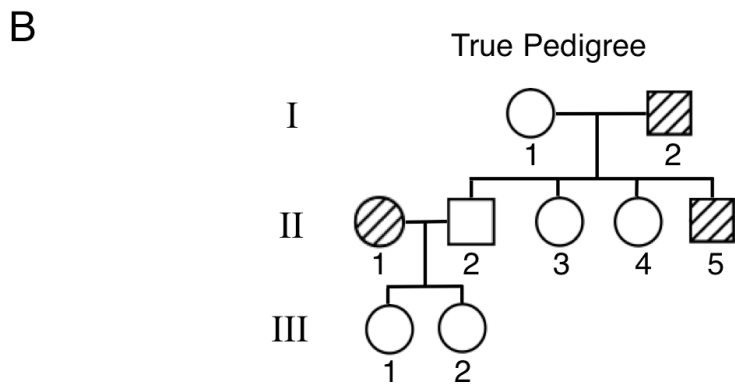

Figure S11. A single example where pairwise relationship checking and removal of an inconsistent sample results in an unnecessary loss of data. Panel A shows the reported pedigree as provided by the investigator. Pairwise relationship checking reveals that all relationships are correct except between sample II-5 and the siblings III-1 and III-2. Standard practice is to remove inconsistent samples, in this case sample II-5, resulting in the 5-person pedigree on the right. Panel B shows the true pedigree where sample II-5 was actually the father of the siblings III-1 and III-2 instead of individual II-2, who was not successfully genotyped, being the father. The mix-up could realistically be explained by a sample swap or by misspecified paternity for the two children, and these types of errors are common. Pedigree reconstruction would have revealed the inconsistency and would have easily reconstructed the true pedigree. Therefore, rather than discarding 17% of the data, the investigator could have retained all samples.



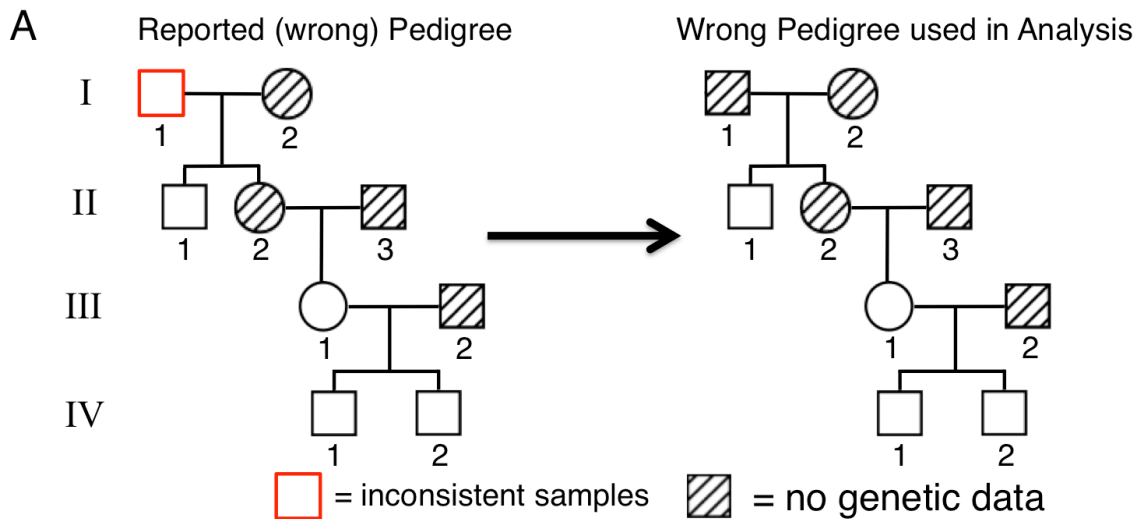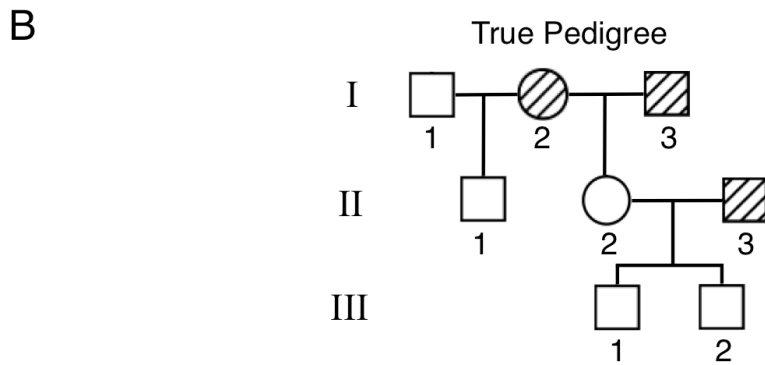

Figure S12. A single example where pairwise relationship checking and removal of an inconsistent sample results in an unnecessary loss of data and the use of an incorrect pedigree. Panel A shows the pedigree as reported by the investigator. Pairwise relationship checking reveals that all relationships are correct except between sample I-1 and samples III-1, IV-1, and IV-2. Standard practice is to remove inconsistent samples, in this case sample I-1, resulting in the 4-person pedigree on the right. Panel B shows the true pedigree. The error in the original pedigree was that sample II-1 was incorrectly assigned as the uncle to sample III-1, when, in fact, they were half-siblings. This mix-up could realistically be explained if the family incorrectly reported their family history or by a clerical error, and these types of errors are common. Pedigree reconstruction would easily have revealed the inconsistency and would have reconstructed the true pedigree. Therefore, rather than discarding 20% of the data and assuming an incorrect pedigree, the investigator would have retained all samples and used the true pedigree in further analyses.

Table S1. True IBD vs. Estimated IBD for different SNP sets

| # of SNPs        | IBD0 $r^2$ | IBD1 $r^2$ | IB2 $r^2$ |
|------------------|------------|------------|-----------|
| 6K               | 0.987      | 0.981      | 0.961     |
| 10K              | 0.992      | 0.99       | 0.984     |
| 20K              | 0.995      | 0.993      | 0.99      |
| 50K              | 0.997      | 0.996      | 0.997     |
| 100K             | 0.997      | 0.997      | 0.997     |
| 1000K            | 0.998      | 0.998      | 0.997     |
| Linkage Panel IV | 0.979      | 0.974      | 0.97      |
| Affy 6.0         | 0.998      | 0.997      | 0.993     |
| CytoSNP          | 0.998      | 0.997      | 0.994     |
| HumanCore        | 0.998      | 0.997      | 0.996     |
| Omni Express     | 0.998      | 0.998      | 0.995     |
| Omni 2.5         | 0.998      | 0.998      | 0.995     |

SNP sets 6K-1000K were generated using PLINK to trim the HapMap3 dataset down to the desired number of SNPs. The remaining SNP sets were generated by taking the intersection of SNPs in those panels and HapMap3. IBD estimates were generated with PLINK using SNPs with a minor allele frequency >1% and a call rate >90%. In statistical package R, we plotted the true IBD proportion to the estimated IBD proportion for each relationship in the 100 halfsib size-20 pedigrees. We then calculated  $r^2$  based on the deviation from  $Y=X$ .

Table S2. Combined simulation reconstruction results

| Size | structure               | 0 Missing samples | 1 Missing samples | 2 Missing samples | 3 Missing samples | 4 Missing samples | 5 Missing samples | 6 Missing samples | 7 Missing samples | 8 Missing samples | 9 Missing samples | 10 Missing samples |
|------|-------------------------|-------------------|-------------------|-------------------|-------------------|-------------------|-------------------|-------------------|-------------------|-------------------|-------------------|--------------------|
| 5    | highest scoring         | 200               | 200               | 200               | NA                 |
| 5    | among highest scoring   | 0                 | 0                 | 0                 | NA                 |
| 5    | among scored            | 0                 | 0                 | 0                 | NA                 |
| 5    | partially reconstructed | 0                 | 0                 | 0                 | NA                 |
| 5    | missing                 | 0                 | 0                 | 0                 | NA                 |
| 10   | highest scoring         | 200               | 200               | 195               | 133               | 6                 | 0                 | NA                | NA                | NA                | NA                | NA                 |
| 10   | among highest scoring   | 0                 | 0                 | 5                 | 65                | 190               | 20                | NA                | NA                | NA                | NA                | NA                 |
| 10   | among scored            | 0                 | 0                 | 0                 | 1                 | 2                 | 4                 | NA                | NA                | NA                | NA                | NA                 |
| 10   | partially reconstructed | 0                 | 0                 | 0                 | 0                 | 0                 | 0                 | NA                | NA                | NA                | NA                | NA                 |
| 10   | missing                 | 0                 | 0                 | 0                 | 1                 | 2                 | 0                 | NA                | NA                | NA                | NA                | NA                 |
| 20   | highest scoring         | 200               | 200               | 193               | 172               | 138               | 95                | 45                | 13                | 0                 | 0                 | 0                  |
| 20   | among highest scoring   | 0                 | 0                 | 6                 | 25                | 54                | 94                | 138               | 156               | 131               | 102               | 68                 |
| 20   | among scored            | 0                 | 0                 | 1                 | 3                 | 7                 | 8                 | 12                | 25                | 62                | 72                | 46                 |
| 20   | partially reconstructed | 0                 | 0                 | 0                 | 0                 | 1                 | 1                 | 2                 | 2                 | 3                 | 1                 | 0                  |
| 20   | missing                 | 0                 | 0                 | 0                 | 0                 | 0                 | 2                 | 3                 | 4                 | 4                 | 3                 | 1                  |
| 30   | highest scoring         | 200               | 199               | 197               | 190               | 171               | 148               | 113               | 74                | 47                | 22                | 3                  |
| 30   | among highest scoring   | 0                 | 0                 | 2                 | 8                 | 25                | 42                | 69                | 91                | 103               | 102               | 90                 |
| 30   | among scored            | 0                 | 0                 | 0                 | 1                 | 2                 | 4                 | 6                 | 14                | 23                | 31                | 40                 |
| 30   | partially reconstructed | 0                 | 1                 | 1                 | 1                 | 2                 | 6                 | 11                | 20                | 25                | 43                | 65                 |
| 30   | missing                 | 0                 | 0                 | 0                 | 0                 | 0                 | 0                 | 1                 | 1                 | 2                 | 2                 | 2                  |
| 40   | highest scoring         | 198               | 197               | 192               | 189               | 183               | 168               | 150               | 126               | 105               | 78                | 49                 |
| 40   | among highest scoring   | 2                 | 2                 | 4                 | 4                 | 9                 | 21                | 31                | 44                | 48                | 61                | 65                 |
| 40   | among scored            | 0                 | 0                 | 0                 | 1                 | 1                 | 1                 | 1                 | 3                 | 8                 | 15                | 20                 |
| 40   | partially reconstructed | 0                 | 1                 | 4                 | 5                 | 6                 | 9                 | 17                | 24                | 37                | 44                | 62                 |
| 40   | missing                 | 0                 | 0                 | 0                 | 1                 | 1                 | 1                 | 1                 | 3                 | 2                 | 2                 | 4                  |
| 50   | highest scoring         | 199               | 197               | 194               | 190               | 186               | 174               | 159               | 141               | 123               | 102               | 84                 |
| 50   | among highest scoring   | 1                 | 0                 | 2                 | 2                 | 2                 | 8                 | 12                | 17                | 24                | 29                | 37                 |
| 50   | among scored            | 0                 | 0                 | 1                 | 0                 | 2                 | 3                 | 6                 | 6                 | 9                 | 9                 | 9                  |
| 50   | partially reconstructed | 0                 | 3                 | 3                 | 7                 | 9                 | 13                | 22                | 35                | 42                | 58                | 68                 |
| 50   | missing                 | 0                 | 0                 | 0                 | 1                 | 1                 | 2                 | 1                 | 1                 | 2                 | 2                 | 2                  |

We combined the reconstruction results for both the Uniform and Halfsib pedigrees. Some of the Halfsib pedigree structures allowed for more samples to be removed than others due to the random

nature of how they were simulated. As a result, Halfsib size-10 with five missing samples and size-20 with nine and ten missing samples do not add up to 200 simulations. We ran 100 simulations for each size and % of missing samples. For each simulation we determined where the true pedigree fell among the ranked reconstruction results. Each bar displays the proportion of the 100 simulations that corresponded to the five reconstruction outcomes defined as follows:

**“highest scoring”** – The true pedigree is the highest scoring pedigree

**“among highest scoring”** – PRIMUS output contained more than one possible pedigree and the true pedigree is tied as the highest scoring pedigree with one or more other pedigrees

**“among scored”** – the true pedigree is not the highest scoring pedigree, but is among the pedigrees generated by PRIMUS

**“partial reconstruction”** – the complete reconstruction either resulted in too many possible pedigrees, ran out of memory, or took longer than 36 hours to run and as a result only a partial reconstruction using 1<sup>st</sup> degree relationships was generated

**“missing”** – PRIMUS reconstructed one or more possible pedigrees, but the true pedigree was not among them

Table S3. The accuracy of PRIMUS and RELPAIR<sup>5</sup> relationship predictions with Halfsib size-20 pedigrees.

| <b>PRIMUS</b>                            |         |         |         |         |         |         |         |         |         |
|------------------------------------------|---------|---------|---------|---------|---------|---------|---------|---------|---------|
| Percent Missing samples                  | 0%      | 5%      | 10%     | 15%     | 20%     | 25%     | 30%     | 35%     | 40%     |
| 1st degree category                      | 100.00% | 100.00% | 100.00% | 100.00% | 100.00% | 100.00% | 100.00% | 100.00% | 100.00% |
| 2nd degree category                      | 100.00% | 100.00% | 100.00% | 100.00% | 99.79%  | 99.63%  | 99.55%  | 99.35%  | 99.55%  |
| 3rd degree category                      | 100.00% | 100.00% | 100.00% | 99.79%  | 98.81%  | 99.26%  | 98.30%  | 96.27%  | 93.37%  |
| Distantly/unrelated                      | 100.00% | 100.00% | 100.00% | 100.00% | 100.00% | 100.00% | 100.00% | 100.00% | 100.00% |
| 1st degree relationship type             | 100.00% | 100.00% | 100.00% | 100.00% | 100.00% | 100.00% | 100.00% | 100.00% | 100.00% |
| 2nd degree relationship type             | 100.00% | 100.00% | 99.37%  | 97.12%  | 96.00%  | 88.45%  | 75.61%  | 66.88%  | 58.48%  |
| 3rd degree relationship type             | 100.00% | 100.00% | 98.13%  | 95.42%  | 92.46%  | 85.68%  | 63.67%  | 46.73%  | 26.54%  |
| 1st degree relationship type + direction | 100.00% | 100.00% | 100.00% | 99.86%  | 99.84%  | 99.57%  | 99.54%  | 99.52%  | 99.92%  |
| 2nd degree relationship type + direction | 100.00% | 100.00% | 99.41%  | 97.80%  | 96.89%  | 91.18%  | 80.92%  | 73.76%  | 61.95%  |
| 3rd degree relationship type + direction | 100.00% | 100.00% | 96.87%  | 93.37%  | 91.90%  | 86.43%  | 68.29%  | 45.41%  | 14.15%  |
|                                          |         |         |         |         |         |         |         |         |         |
| <b>RELPAIR</b>                           |         |         |         |         |         |         |         |         |         |
| Percent Missing samples                  | 0%      | 5%      | 10%     | 15%     | 20%     | 25%     | 30%     | 35%     | 40%     |
| 1st degree category                      | 100.00% | 100.00% | 100.00% | 100.00% | 100.00% | 100.00% | 100.00% | 100.00% | 100.00% |
| 2nd degree category                      | 99.98%  | 99.98%  | 99.97%  | 99.97%  | 99.97%  | 99.96%  | 100.00% | 100.00% | 100.00% |
| 3rd degree category                      | 82.72%  | 82.89%  | 82.98%  | 83.13%  | 83.22%  | 83.25%  | 83.32%  | 83.48%  | 83.57%  |
| Distantly/unrelated                      | 97.17%  | 96.67%  | 96.04%  | 95.07%  | 93.75%  | 91.77%  | 88.16%  | 82.52%  | 66.98%  |
| 1st relationship type                    | 100.00% | 100.00% | 100.00% | 100.00% | 100.00% | 100.00% | 100.00% | 100.00% | 100.00% |
| 2nd relationship type                    | 55.95%  | 55.27%  | 55.81%  | 56.18%  | 56.68%  | 57.17%  | 56.20%  | 57.60%  | 55.89%  |
| 3rd relationship type                    | NA      |
| 1st degree relationship type + direction | NA      |
| 2nd degree relationship type + direction | NA      |
| 3rd degree relationship type + direction | NA      |

Halfsib size-20 pedigrees with 0% to 40% missing samples were used to test the pairwise relationship prediction accuracy of both PRIMUS and RELPAIR<sup>5</sup>. We compared the pairwise relationship of the highest ranked pedigree in PRIMUS to the true simulated relationship. We used the method employed by Pemberton et al.<sup>6</sup> to obtain the RELPAIR prediction and then compared that to the true simulated relationship. The table shows accuracy of each method at correctly predicting each relationship in the pedigree by the degree of relatedness (e.g., A and B are first degree relatives), the type of relationship (e.g., A and B have a parental relationship), and the type and directionality of the relationship (e.g., A is the parent of B). The results have been grouped by the degree of the relationships. RELPAIR does not make a distinction between the four 3<sup>rd</sup> degree relationships nor is it able to predict the directionality of pairwise relationships; therefore, NA is used for those results. The highlighted results are the ones plotted in Figure 2.

Table S4. EOCOPD pedigree reconstruction summary

| Fam FID | Reconstructed Correctly | Number of Genotyped Samples | Reconstructed FIDs | Expected Pedigree Rank | Number of Possible Pedigrees | Explanation                                               |
|---------|-------------------------|-----------------------------|--------------------|------------------------|------------------------------|-----------------------------------------------------------|
| Fam1    | 1                       | 11                          | 1                  | 1                      | 2                            |                                                           |
| Fam2    | 1                       | 8                           | 2                  | 1                      | 1                            |                                                           |
| Fam3    | 1                       | 13                          | 3                  | 2                      | 2                            |                                                           |
| Fam4    | 1                       | 3                           | 4                  | 1                      | 1                            |                                                           |
| Fam5    | 1                       | 15                          | 5                  | 1                      | 1                            |                                                           |
| Fam6    | 0                       | 9                           | 6                  | NA                     | 20                           | NON PATERNITY CAUGHT: half sib is actually full sib       |
| Fam7    | 1                       | 10                          | 7                  | 20                     | 28                           |                                                           |
| Fam8    | 1                       | 9                           | 8                  | 1                      | 1                            |                                                           |
| Fam9    | 1                       | 8                           | 9                  | 1                      | 1                            |                                                           |
| Fam10   | 1                       | 9                           | 10                 | 1                      | 1                            |                                                           |
| Fam11   | 1                       | 4                           | 11                 | 3                      | 7                            |                                                           |
| Fam12   | 1                       | 2                           | 12                 | 1                      | 1                            |                                                           |
| Fam13   | 1                       | 3                           | 13                 | 1                      | 1                            |                                                           |
| Fam14   | 1                       | 5                           | 14                 | 1                      | 1                            |                                                           |
| Fam15   | 1                       | 2                           | 15                 | 2                      | 2                            |                                                           |
| Fam16   | 1                       | 2                           | 16                 | 1                      | 1                            |                                                           |
| Fam17   | 1                       | 8                           | 17                 | 1                      | 1                            |                                                           |
| Fam18   | 1                       | 6                           | 18                 | 1                      | 2                            |                                                           |
| Fam19   | 1                       | 5                           | 19                 | 32                     | 33                           |                                                           |
| Fam20   | 1                       | 15                          | 20                 | 4                      | 11                           |                                                           |
| Fam21   | 1                       | 5                           | 21                 | 1                      | 1                            |                                                           |
| Fam22   | 1                       | 13                          | 22                 | 1                      | 2                            |                                                           |
| Fam23   | 1                       | 8                           | 23                 | 2                      | 3                            |                                                           |
| Fam24   | 0                       | 10                          | 24                 | NA                     | 5                            | NON PATERNITY CAUGHT: half avuncular instead of avuncular |
| Fam25   | 1                       | 5                           | 25                 | 1                      | 1                            |                                                           |
| Fam26   | 1                       | 6                           | 26                 | 1                      | 2                            |                                                           |
| Fam27   | 1                       | 6                           | 27                 | 1                      | 1                            |                                                           |
| Fam28   | 1                       | 14                          | 28                 | 1                      | 1                            |                                                           |
| Fam29   | 1                       | 3                           | 29                 | 1                      | 1                            |                                                           |
| Fam30   | 1                       | 11                          | 30                 | 1                      | 2                            |                                                           |
| Fam31   | 1                       | 5                           | 31                 | 1                      | 1                            |                                                           |
| Fam32   | 0                       | 6                           | 32                 | NA                     | 4                            | NON PATERNITY CAUGHT                                      |

|       |   |    |       |    |   |                                                          |
|-------|---|----|-------|----|---|----------------------------------------------------------|
| Fam33 | 1 | 3  | 33    | 1  | 1 |                                                          |
| Fam34 | 1 | 4  | 34    | 1  | 4 |                                                          |
| Fam35 | 0 | 6  | 35,39 | NA | 1 | Sample missing because of duplicate; Also non-paternity; |
| Fam36 | 1 | 3  | 36    | 1  | 1 |                                                          |
| Fam37 | 1 | 2  | 37    | 2  | 5 |                                                          |
| Fam38 | 1 | 3  | 38    | 1  | 1 |                                                          |
| Fam39 | 1 | 15 | 39    | 3  | 3 | Contains duplicate sample                                |
| Fam40 | 1 | 5  | 40    | 1  | 1 |                                                          |
| Fam41 | 1 | 6  | 41    | 1  | 3 |                                                          |
| Fam42 | 1 | 5  | 42    | 1  | 1 |                                                          |
| Fam43 | 1 | 9  | 43    | 4  | 6 |                                                          |
| Fam44 | 1 | 14 | 44    | 1  | 2 |                                                          |
| Fam45 | 0 | 7  | 45    | NA | 1 | NON PATERNITY CAUGHT                                     |
| Fam46 | 1 | 3  | 46    | 1  | 1 |                                                          |
| Fam47 | 1 | 6  | 47    | 4  | 4 |                                                          |
| Fam48 | 1 | 4  | 48    | 1  | 1 |                                                          |
| Fam49 | 1 | 10 | 49    | 1  | 1 |                                                          |

Table S5. Comparison of HapMap3 pairwise relationships. Each pair of individuals that is predicted to be related in at least one possible pedigree is represented in this table. The table lists the reported relationships from HapMap3, Pemberton et al.<sup>6</sup>, Kyriazopoulou-Panagiotopoulou et al.<sup>1</sup> (CARROT), and PRIMUS. The relationships in the PRIMUS column are the aggregate of all relationships from the possible pedigrees, and they are listed as what their relationship is to the other person on the same line. For example, the first row shows that NA19916 is the parent (P) of NA19918, and NA19918 is the offspring (O) of NA19916.

| Population | Network | IID1    | Sex | Hapmap Reported | PRIMUS Predicted                | Pemberton Predicted | CARROT Predicted | IID2    | Sex | Hapmap Reported | PRIMUS Predicted                | Pemberton Predicted | CARROT Predicted | Notes |
|------------|---------|---------|-----|-----------------|---------------------------------|---------------------|------------------|---------|-----|-----------------|---------------------------------|---------------------|------------------|-------|
| ASW        | 1       | NA19916 | M   | P               | P                               | O,P                 | -                | NA19918 | M   | O               | O                               | O,P                 | -                |       |
| ASW        | 1       | NA19917 | F   | P               | P                               | O,P                 | -                | NA19918 | M   | O               | O                               | O,P                 | -                |       |
| ASW        | 2       | NA19834 | M   | P               | P                               | O,P                 | -                | NA19836 | F   | O               | O                               | O,P                 | -                |       |
| ASW        | 2       | NA19835 | F   | P               | P                               | O,P                 | -                | NA19836 | F   | O               | O                               | O,P                 | -                |       |
| ASW        | 3       | NA20279 | M   | -               | O                               | O,P                 | -                | NA20282 | F   | -               | P                               | O,P                 | -                |       |
| ASW        | 3       | NA20279 | M   | -               | H                               | H                   | -                | NA20284 | M   | -               | H                               | H                   | -                | R*    |
| ASW        | 3       | NA20279 | M   | -               | N                               | N                   | -                | NA20301 | F   | -               | A                               | A                   | -                | R     |
| ASW        | 3       | NA20279 | M   | -               | 1C                              | -                   | 1C               | NA20302 | M   | -               | 1C                              | -                   | 1C               |       |
| ASW        | 3       | NA20282 | F   | P               | P                               | O,P                 | -                | NA20284 | M   | O               | O                               | O,P                 | -                |       |
| ASW        | 3       | NA20282 | F   | -               | F                               | F                   | -                | NA20301 | F   | -               | F                               | F                   | -                |       |
| ASW        | 3       | NA20282 | F   | -               | A                               | A                   | -                | NA20302 | M   | -               | N                               | N                   | -                | R*    |
| ASW        | 3       | NA20284 | M   | -               | N                               | N                   | -                | NA20301 | F   | -               | A                               | A                   | -                | R     |
| ASW        | 3       | NA20284 | M   | -               | 1C                              | -                   | 1C               | NA20302 | M   | -               | 1C                              | -                   | 1C               |       |
| ASW        | 3       | NA20301 | F   | P               | P                               | O,P                 | -                | NA20302 | M   | O               | O                               | O,P                 | -                |       |
| ASW        | 4       | NA19703 | M   | P               | P                               | O,P                 | -                | NA19705 | M   | O               | O                               | O,P                 | -                |       |
| ASW        | 4       | NA19704 | F   | P               | P                               | O,P                 | -                | NA19705 | M   | O               | O                               | O,P                 | -                |       |
| ASW        | 6       | NA19900 | M   | P               | P                               | O,P                 | -                | NA19902 | F   | O               | O                               | O,P                 | -                |       |
| ASW        | 6       | NA19901 | F   | P               | P                               | O,P                 | -                | NA19902 | F   | O               | O                               | O,P                 | -                |       |
| ASW        | 9       | NA20287 | F   | P               | O,P                             | O,P                 | -                | NA20288 | M   | O               | O,P                             | O,P                 | -                |       |
| ASW        | 14      | NA19713 | F   | -               | A                               | A                   | -                | NA19714 | F   | -               | N                               | N                   | -                | R     |
| ASW        | 14      | NA19713 | F   | P               | P                               | O,P                 | -                | NA19983 | F   | O               | O                               | O,P                 | -                |       |
| ASW        | 14      | NA19713 | F   | -               | F                               | F                   | -                | NA19985 | F   | -               | F                               | F                   | -                | R     |
| ASW        | 14      | NA19714 | F   | -               | 1C                              | -                   | 1C               | NA19983 | F   | -               | 1C                              | -                   | 1C               |       |
| ASW        | 14      | NA19714 | F   | O               | O                               | O,P                 | -                | NA19985 | F   | P               | P                               | O,P                 | -                |       |
| ASW        | 14      | NA19982 | M   | P               | P                               | O,P                 | -                | NA19983 | F   | O               | O                               | O,P                 | -                |       |
| ASW        | 14      | NA19983 | F   | -               | N                               | N                   | -                | NA19985 | F   | -               | A                               | A                   | -                | R*    |
| ASW        | 15      | NA20340 | M   | -               | 1C,GA,GC<br>,GG,GN,H<br>A,HN,UN | -                   | U                | NA20344 | F   | -               | 1C,GA,GC<br>,GG,GN,H<br>A,HN,UN | -                   | U                |       |
| ASW        | 15      | NA20340 | M   | -               | 1C,GA,GC<br>,GG,GN,H<br>A,HN,UN | -                   | -                | NA20349 | M   | -               | 1C,GA,GC<br>,GG,GN,H<br>A,HN,UN | -                   | -                | N     |
| ASW        | 15      | NA20344 | F   | P               | P                               | O,P                 | -                | NA20345 | M   | O               | O                               | O,P                 | -                |       |
| ASW        | 15      | NA20344 | F   | -               | F                               | F                   | -                | NA20349 | M   | -               | F                               | F                   | -                |       |
| ASW        | 15      | NA20344 | F   | -               | A                               | A                   | -                | NA20350 | M   | -               | N                               | N                   | -                | R     |
| ASW        | 15      | NA20345 | M   | -               | N                               | N                   | -                | NA20349 | M   | -               | A                               | A                   | -                | R*    |
| ASW        | 15      | NA20345 | M   | -               | 1C                              | -                   | 1C               | NA20350 | M   | -               | 1C                              | -                   | 1C               |       |
| ASW        | 15      | NA20349 | M   | P               | P                               | O,P                 | -                | NA20350 | M   | O               | O                               | O,P                 | -                |       |



|     |    |         |   |   |                                           |     |    |         |   |   |                                           |     |    |     |
|-----|----|---------|---|---|-------------------------------------------|-----|----|---------|---|---|-------------------------------------------|-----|----|-----|
| ASW | 16 | NA20281 | M | - | 1C,GA,GC<br>,GG,GN,H<br>A,HN,UN           | -   | -  | NA20297 | M | - | 1C,GA,GC<br>,GG,GN,H<br>A,HN,UN           | -   | -  | N   |
| ASW | 17 | NA19908 | M | P | P                                         | O,P | -  | NA19919 | M | O | O                                         | O,P | -  |     |
| ASW | 17 | NA19909 | F | P | P                                         | O,P | -  | NA19919 | M | O | O                                         | O,P | -  |     |
| ASW | 20 | NA19818 | M | P | P                                         | O,P | -  | NA19828 | M | O | O                                         | O,P | -  |     |
| ASW | 20 | NA19819 | F | P | P                                         | O,P | -  | NA19828 | M | O | O                                         | O,P | -  |     |
| ASW | 29 | NA20294 | F | P | O,P                                       | O,P | -  | NA20295 | M | O | O,P                                       | O,P | -  |     |
| ASW | 30 | NA20334 | F | P | P                                         | O,P | -  | NA20335 | M | O | O                                         | O,P | -  |     |
| ASW | 30 | NA20334 | F | - | F                                         | F   | -  | NA20336 | F | - | F                                         | F   | -  | R   |
| ASW | 30 | NA20334 | F | - | A                                         | A   | -  | NA20337 | F | - | N                                         | N   | -  | R   |
| ASW | 30 | NA20335 | M | - | N                                         | N   | -  | NA20336 | F | - | A                                         | A   | -  | R   |
| ASW | 30 | NA20335 | M | - | 1C                                        | -   | 1C | NA20337 | F | - | 1C                                        | -   | 1C |     |
| ASW | 30 | NA20336 | F | P | P                                         | O,P | -  | NA20337 | F | O | O                                         | O,P | -  |     |
| ASW | 44 | NA19700 | M | P | P                                         | O,P | -  | NA19702 | M | O | O                                         | O,P | -  |     |
| ASW | 44 | NA19701 | F | P | P                                         | O,P | -  | NA19702 | M | O | O                                         | O,P | -  |     |
| ASW | 46 | NA20289 | F | P | P                                         | O,P | -  | NA20290 | F | O | O                                         | O,P | -  |     |
| ASW | 46 | NA20289 | F | - | F                                         | F   | -  | NA20341 | F | - | F                                         | F   | -  | R   |
| ASW | 46 | NA20290 | F | - | 1C,GC,GG<br>,GN,HN,U<br>N                 | -   | U  | NA20333 | F | - | 1C,GA,GC<br>,GG,HA,U<br>N                 | -   | U  | P   |
| ASW | 46 | NA20290 | F | - | N                                         | N   | -  | NA20341 | F | - | A                                         | A   | -  | R   |
| ASW | 46 | NA20332 | F | P | O,P                                       | O,P | -  | NA20333 | F | O | O,P                                       | O,P | -  |     |
| ASW | 46 | NA20332 | F | - | A,G,H                                     | U   | -  | NA20343 | M | - | C,H,N                                     | U   | -  | R,P |
| ASW | 46 | NA20332 | F | - | 1C,UN                                     | -   | -  | NA20346 | M | - | 1C,UN                                     | -   | -  | N   |
| ASW | 46 | NA20333 | F | - | 1C,GC,HA<br>,HN                           | -   | U  | NA20343 | M | - | 1C,GC,HA<br>,HN                           | -   | U  | P   |
| ASW | 46 | NA20342 | M | P | P                                         | O,P | -  | NA20343 | M | O | O                                         | O,P | -  |     |
| ASW | 46 | NA20343 | M | - | 1C,GC,GG<br>,GN,HN,U<br>N                 | -   | U  | NA20346 | M | - | 1C,GA,GC<br>,GG,HA,U<br>N                 | -   | U  | P   |
| ASW | 46 | NA20346 | M | P | P                                         | O,P | -  | NA20347 | M | O | O                                         | O,P | -  |     |
| ASW | 46 | NA20347 | M | - | 1C,GC,GN<br>,HA,HN,U<br>N                 | -   | -  | NA20359 | F | - | 1C,GA,GC<br>,HA,HN,U<br>N                 | -   | -  | N   |
| ASW | 46 | NA20347 | M | - | 1C,GC,GG<br>,GN,HA,H<br>N,UN              | -   | -  | NA20360 | M | - | 1C,GA,GC<br>,GG,HA,H<br>N,UN              | -   | -  | N   |
| ASW | 46 | NA20347 | M | - | C,H,N                                     | H   | -  | NA20363 | F | - | A,G,H                                     | H   | -  | R,? |
| ASW | 46 | NA20347 | M | - | 1C,GC,HA<br>,HN                           | -   | HA | NA20364 | F | - | 1C,GC,HA<br>,HN                           | -   | HN | ?   |
| ASW | 46 | NA20359 | F | P | O,P                                       | O,P | -  | NA20360 | M | O | O,P                                       | O,P | -  |     |
| ASW | 46 | NA20359 | F | - | A,C,G,H,N<br>1C,GA,GC<br>,GG,HA,H<br>N,UN | A   | -  | NA20363 | F | - | A,C,G,H,N<br>1C,GC,GG<br>,GN,HA,H<br>N,UN | N   | -  | R,? |
| ASW | 46 | NA20359 | F | - | 1C,GC,GG<br>,GN,HA,H<br>N,UN              | -   | GA | NA20364 | F | - | 1C,GA,GC<br>,GG,HA,H<br>N,UN              | -   | GN | ?   |
| ASW | 46 | NA20360 | M | - | N,UN                                      | -   | 1C | NA20363 | F | - | N,UN                                      | -   | 1C | ?   |
| ASW | 46 | NA20363 | F | P | O,P                                       | O,P | -  | NA20364 | F | O | O,P                                       | O,P | -  |     |
| ASW | 48 | NA20356 | M | P | P                                         | O,P | -  | NA20358 | M | O | O                                         | O,P | -  |     |
| ASW | 48 | NA20357 | F | P | P                                         | O,P | -  | NA20358 | M | O | O                                         | O,P | -  |     |
| ASW | 49 | NA20291 | M | P | O,P                                       | O,P | -  | NA20292 | F | O | O,P                                       | O,P | -  |     |
| ASW | 62 | NA19921 | F | P | O,P                                       | O,P | -  | NA20129 | F | O | O,P                                       | O,P | -  |     |
| ASW | 65 | NA20317 | F | P | O,P                                       | O,P | -  | NA20319 | F | O | O,P                                       | O,P | -  |     |
| ASW | 71 | NA20126 | M | P | P                                         | O,P | -  | NA20128 | F | O | O                                         | O,P | -  |     |
| ASW | 71 | NA20127 | F | P | P                                         | O,P | -  | NA20128 | F | O | O                                         | O,P | -  |     |

|     |    |         |   |   |     |     |   |         |   |   |     |     |   |
|-----|----|---------|---|---|-----|-----|---|---------|---|---|-----|-----|---|
| ASW | 74 | NA19914 | F | P | O,P | O,P | - | NA19915 | M | O | O,P | O,P | - |
| ASW | 80 | NA20276 | F | P | O,P | O,P | - | NA20277 | F | O | O,P | O,P | - |
| CEU | 1  | NA10865 | M | O | O   | O,P | - | NA11891 | M | P | P   | O,P | - |
| CEU | 1  | NA10865 | M | O | O   | O,P | - | NA11892 | F | P | P   | O,P | - |
| CEU | 8  | NA10836 | F | O | O,P | O,P | - | NA12275 | F | P | O,P | O,P | - |
| CEU | 12 | NA10852 | F | O | O,P | O,P | - | NA12045 | M | P | O,P | O,P | - |
| CEU | 22 | NA10837 | M | O | O   | O,P | - | NA12272 | M | P | P   | O,P | - |
| CEU | 22 | NA10837 | M | O | O   | O,P | - | NA12273 | F | P | P   | O,P | - |
| CEU | 26 | NA12766 | M | O | O   | O,P | - | NA12775 | M | P | P   | O,P | - |
| CEU | 26 | NA12766 | M | O | O   | O,P | - | NA12776 | F | P | P   | O,P | - |
| CEU | 27 | NA12344 | M | O | O   | O,P | - | NA12347 | M | P | P   | O,P | - |
| CEU | 27 | NA12344 | M | O | O   | O,P | - | NA12348 | F | P | P   | O,P | - |
| CEU | 28 | NA12817 | M | O | O   | O,P | - | NA12827 | M | P | P   | O,P | - |
| CEU | 28 | NA12817 | M | O | O   | O,P | - | NA12828 | F | P | P   | O,P | - |
| CEU | 29 | NA10840 | F | O | O   | O,P | - | NA12286 | M | P | P   | O,P | - |
| CEU | 29 | NA10840 | F | O | O   | O,P | - | NA12287 | F | P | P   | O,P | - |
| CEU | 32 | NA12708 | F | O | O,P | O,P | - | NA12718 | F | P | O,P | O,P | - |
| CEU | 37 | NA06995 | M | O | O   | O,P | - | NA07037 | F | P | P   | O,P | - |
| CEU | 37 | NA06995 | M | O | O   | O,P | - | NA07435 | M | P | P   | O,P | - |
| CEU | 44 | NA12375 | M | O | O,P | O,P | - | NA12383 | F | P | O,P | O,P | - |
| CEU | 46 | NA12335 | M | O | O   | O,P | - | NA12340 | M | P | P   | O,P | - |
| CEU | 46 | NA12335 | M | O | O   | O,P | - | NA12341 | F | P | P   | O,P | - |
| CEU | 47 | NA12767 | F | O | O   | O,P | - | NA12777 | M | P | P   | O,P | - |
| CEU | 47 | NA12767 | F | O | O   | O,P | - | NA12778 | F | P | P   | O,P | - |
| CEU | 50 | NA12877 | M | O | O   | O,P | - | NA12889 | M | P | P   | O,P | - |
| CEU | 50 | NA12877 | M | O | O   | O,P | - | NA12890 | F | P | P   | O,P | - |
| CEU | 52 | NA07346 | F | P | P   | O,P | - | NA07349 | M | O | O   | O,P | - |
| CEU | 52 | NA07347 | M | P | P   | O,P | - | NA07349 | M | O | O   | O,P | - |
| CEU | 54 | NA12739 | M | O | O   | O,P | - | NA12748 | M | P | P   | O,P | - |
| CEU | 54 | NA12739 | M | O | O   | O,P | - | NA12749 | F | P | P   | O,P | - |
| CEU | 55 | NA10864 | F | O | O   | O,P | - | NA11893 | M | P | P   | O,P | - |
| CEU | 55 | NA10864 | F | O | O   | O,P | - | NA11894 | F | P | P   | O,P | - |
| CEU | 59 | NA10853 | M | O | O,P | O,P | - | NA11843 | M | P | O,P | O,P | - |
| CEU | 61 | NA12818 | F | O | O   | O,P | - | NA12829 | M | P | P   | O,P | - |
| CEU | 61 | NA12818 | F | O | O   | O,P | - | NA12830 | F | P | P   | O,P | - |
| CEU | 65 | NA10843 | F | O | O   | O,P | - | NA11919 | M | P | P   | O,P | - |
| CEU | 65 | NA10843 | F | O | O   | O,P | - | NA11920 | F | P | P   | O,P | - |
| CEU | 66 | NA12376 | F | O | O   | O,P | - | NA12489 | F | P | P   | O,P | - |
| CEU | 66 | NA12376 | F | O | O   | O,P | - | NA12546 | M | P | P   | O,P | - |
| CEU | 70 | NA12832 | F | O | O   | O,P | - | NA12842 | M | P | P   | O,P | - |
| CEU | 70 | NA12832 | F | O | O   | O,P | - | NA12843 | F | P | P   | O,P | - |
| CEU | 74 | NA07014 | F | O | O   | O,P | - | NA07031 | F | P | P   | O,P | - |
| CEU | 74 | NA07014 | F | O | O   | O,P | - | NA07051 | M | P | P   | O,P | - |
| CEU | 77 | NA12386 | F | O | O   | O,P | - | NA12399 | M | P | P   | O,P | - |
| CEU | 77 | NA12386 | F | O | O   | O,P | - | NA12400 | F | P | P   | O,P | - |

|     |     |         |   |   |     |     |    |         |   |   |     |     |    |
|-----|-----|---------|---|---|-----|-----|----|---------|---|---|-----|-----|----|
| CEU | 80  | NA12336 | F | O | O   | O,P | -  | NA12342 | M | P | P   | O,P | -  |
| CEU | 80  | NA12336 | F | O | O   | O,P | -  | NA12343 | F | P | P   | O,P | -  |
| CEU | 82  | NA10845 | M | O | O   | O,P | -  | NA11930 | M | P | P   | O,P | -  |
| CEU | 82  | NA10845 | M | O | O   | O,P | -  | NA11931 | F | P | P   | O,P | -  |
| CEU | 86  | NA10847 | F | O | O   | O,P | -  | NA12146 | M | P | P   | O,P | -  |
| CEU | 86  | NA10847 | F | O | O   | O,P | -  | NA12239 | F | P | P   | O,P | -  |
| CEU | 87  | NA10859 | F | O | O   | O,P | -  | NA11881 | M | P | P   | O,P | -  |
| CEU | 87  | NA10859 | F | O | O   | O,P | -  | NA11882 | F | P | P   | O,P | -  |
| CEU | 89  | NA12707 | M | O | O,P | O,P | -  | NA12716 | M | P | O,P | O,P | -  |
| CEU | 90  | NA10830 | M | O | O,P | O,P | -  | NA12154 | M | P | O,P | O,P | -  |
| CEU | 91  | NA12753 | F | O | O   | O,P | -  | NA12762 | M | P | P   | O,P | -  |
| CEU | 91  | NA12753 | F | O | O   | O,P | -  | NA12763 | F | P | P   | O,P | -  |
| CEU | 94  | NA12865 | F | O | O   | O,P | -  | NA12874 | M | P | P   | O,P | -  |
| CEU | 94  | NA12865 | F | O | O   | O,P | -  | NA12875 | F | P | P   | O,P | -  |
| CEU | 96  | NA10831 | F | O | O   | O,P | -  | NA12155 | M | P | P   | O,P | -  |
| CEU | 96  | NA10831 | F | O | O   | O,P | -  | NA12156 | F | P | P   | O,P | -  |
| CEU | 106 | NA12752 | M | O | O   | O,P | -  | NA12760 | M | P | P   | O,P | -  |
| CEU | 106 | NA12752 | M | O | O   | O,P | -  | NA12761 | F | P | P   | O,P | -  |
| CEU | 107 | NA06985 | F | P | P   | O,P | -  | NA06991 | F | O | O   | O,P | -  |
| CEU | 107 | NA06991 | F | O | O   | O,P | -  | NA06993 | M | P | P   | O,P | -  |
| CEU | 108 | NA10838 | M | O | O,P | O,P | -  | NA12003 | M | P | O,P | O,P | -  |
| CEU | 111 | NA06986 | M | P | P   | O,P | -  | NA06997 | F | O | O   | O,P | -  |
| CEU | 111 | NA06997 | F | O | O   | O,P | -  | NA07045 | F | P | P   | O,P | -  |
| CEU | 111 | NA06997 | F | - | 1C  | -   | 1C | NA12801 | M | - | 1C  | -   | 1C |
| CEU | 111 | NA06997 | F | - | N   | N   | -  | NA12813 | F | - | A   | A   | -  |
| CEU | 111 | NA07045 | F | - | A   | A   | -  | NA12801 | M | - | N   | N   | -  |
| CEU | 111 | NA07045 | F | - | F   | F   | -  | NA12813 | F | - | F   | F   | -  |
| CEU | 111 | NA12801 | M | O | O   | O,P | -  | NA12812 | M | P | P   | O,P | -  |
| CEU | 111 | NA12801 | M | O | O   | O,P | -  | NA12813 | F | P | P   | O,P | -  |
| CEU | 115 | NA10863 | F | O | O   | O,P | -  | NA12234 | F | P | P   | O,P | -  |
| CEU | 115 | NA10863 | F | O | O   | O,P | -  | NA12264 | M | P | P   | O,P | -  |
| CEU | 117 | NA12802 | F | O | O   | O,P | -  | NA12814 | M | P | P   | O,P | -  |
| CEU | 117 | NA12802 | F | O | O   | O,P | -  | NA12815 | F | P | P   | O,P | -  |
| CEU | 122 | NA10846 | M | O | O   | O,P | -  | NA12144 | M | P | P   | O,P | -  |
| CEU | 122 | NA10846 | M | O | O   | O,P | -  | NA12145 | F | P | P   | O,P | -  |
| CEU | 127 | NA10854 | F | O | O   | O,P | -  | NA11839 | M | P | P   | O,P | -  |
| CEU | 127 | NA10854 | F | O | O   | O,P | -  | NA11840 | F | P | P   | O,P | -  |
| CEU | 131 | NA10855 | F | O | O   | O,P | -  | NA11831 | M | P | P   | O,P | -  |
| CEU | 131 | NA10855 | F | O | O   | O,P | -  | NA11832 | F | P | P   | O,P | -  |
| CEU | 132 | NA06994 | M | P | P   | O,P | -  | NA07029 | M | O | O   | O,P | -  |
| CEU | 132 | NA07000 | F | P | P   | O,P | -  | NA07029 | M | O | O   | O,P | -  |
| CEU | 137 | NA12740 | F | O | O   | O,P | -  | NA12750 | M | P | P   | O,P | -  |
| CEU | 137 | NA12740 | F | O | O   | O,P | -  | NA12751 | F | P | P   | O,P | -  |
| CEU | 139 | NA10839 | F | O | O   | O,P | -  | NA12005 | M | P | P   | O,P | -  |
| CEU | 139 | NA10839 | F | O | O   | O,P | -  | NA12006 | F | P | P   | O,P | -  |

R  
R

|     |     |         |   |   |                                 |     |    |         |   |   |                                 |     |    |     |
|-----|-----|---------|---|---|---------------------------------|-----|----|---------|---|---|---------------------------------|-----|----|-----|
| CEU | 141 | NA07345 | F | P | P                               | O,P | -  | NA07348 | F | O | O                               | O,P | -  |     |
| CEU | 141 | NA07348 | F | O | O                               | O,P | -  | NA07357 | M | P | P                               | O,P | -  |     |
| CEU | 143 | NA12878 | F | O | O                               | O,P | -  | NA12891 | M | P | P                               | O,P | -  |     |
| CEU | 143 | NA12878 | F | O | O                               | O,P | -  | NA12892 | F | P | P                               | O,P | -  |     |
| CEU | 147 | NA12864 | M | O | O                               | O,P | -  | NA12872 | M | P | P                               | O,P | -  |     |
| CEU | 147 | NA12864 | M | O | O                               | O,P | -  | NA12873 | F | P | P                               | O,P | -  |     |
| CEU | 150 | NA10856 | M | O | O                               | O,P | -  | NA11829 | M | P | P                               | O,P | -  |     |
| CEU | 150 | NA10856 | M | O | O                               | O,P | -  | NA11830 | F | P | P                               | O,P | -  |     |
| CEU | 152 | NA10835 | M | O | O                               | O,P | -  | NA12248 | M | P | P                               | O,P | -  |     |
| CEU | 152 | NA10835 | M | O | O                               | O,P | -  | NA12249 | F | P | P                               | O,P | -  |     |
| CEU | 156 | NA10861 | F | O | O                               | O,P | -  | NA11994 | M | P | P                               | O,P | -  |     |
| CEU | 156 | NA10861 | F | O | O                               | O,P | -  | NA11995 | F | P | P                               | O,P | -  |     |
| CHD | 2   | NA17981 | F | - | F                               | F   | -  | NA17986 | M | - | F                               | F   | -  | R   |
| CHD | 16  | NA17980 | M | - | A,C,G,H,N                       | U   | -  | NA18150 | F | - | A,C,G,H,N                       | U   | -  | R   |
| GIH | 54  | NA20909 | M | - | O,P                             | U   | -  | NA20910 | F | - | O,P                             | U   | -  | R   |
| GIH | 61  | NA20882 | F | - | P                               | P   | -  | NA20900 | F | - | O                               | O   | -  | R   |
| GIH | 61  | NA20891 | M | - | P                               | P   | -  | NA20900 | F | - | O                               | O   | -  | R   |
| GIH | 61  | NA20891 | M | - | A,C,G,H,N                       | A   | -  | NA20907 | F | - | A,C,G,H,N                       | N   | -  | R,? |
| GIH | 61  | NA20900 | F | - | 1C,GC,GN<br>,HA,HN              | -   | -  | NA20907 | F | - | 1C,GA,GG<br>,HA,HN              | -   | -  | N   |
| GIH | 71  | NA20874 | F | - | F                               | F   | -  | NA20879 | F | - | F                               | F   | -  | R   |
| LWK | 3   | NA19027 | M | - | A,C,G,H,N                       | U   | -  | NA19311 | M | - | A,C,G,H,N                       | U   | -  | R   |
| LWK | 13  | NA19396 | F | - | F                               | F   | -  | NA19397 | M | - | F                               | F   | -  | R   |
| LWK | 22  | NA19380 | M | - | 1C,C,GA,<br>GC,GG,H<br>A,HN,N   | -   | -  | NA19381 | F | - | 1C,A,G,G<br>C,GG,GN,<br>HA,HN   | -   | -  | N   |
| LWK | 22  | NA19380 | M | - | A,C,G,H,N                       | H   | -  | NA19382 | M | - | A,C,G,H,N                       | H   | -  | R,? |
| LWK | 22  | NA19381 | F | - | O,P                             | U   | -  | NA19382 | M | - | O,P                             | U   | -  | R   |
| LWK | 38  | NA19347 | M | - | F                               | F   | -  | NA19352 | M | - | F                               | F   | -  | R   |
| LWK | 45  | NA19313 | F | - | A,C,G,H,N                       | U   | -  | NA19334 | M | - | A,C,G,H,N                       | U   | -  | R   |
| LWK | 60  | NA19443 | M | - | A                               | A   | -  | NA19469 | F | - | N                               | N   | -  | R   |
| LWK | 60  | NA19443 | M | - | F                               | F   | -  | NA19470 | F | - | F                               | F   | -  | R   |
| LWK | 60  | NA19469 | F | - | O                               | O   | -  | NA19470 | F | - | P                               | P   | -  | R   |
| LWK | 69  | NA19434 | F | - | F                               | F   | -  | NA19444 | M | - | F                               | F   | -  | R   |
| LWK | 71  | NA19451 | M | - | 1C,GA,GC<br>,GG,GN,H<br>A,HN,UN | -   | -  | NA19452 | M | - | 1C,GA,GC<br>,GG,GN,H<br>A,HN,UN | -   | -  | N   |
| LWK | 80  | NA19373 | M | - | F                               | F   | -  | NA19374 | M | - | F                               | F   | -  | R   |
| LWK | 82  | NA19309 | M | - | 1C,GA,GC<br>,GG,GN,H<br>A,HN,UN | -   | -  | NA19359 | M | - | 1C,GA,GC<br>,GG,GN,H<br>A,HN,UN | -   | -  | N   |
| MEX | 0   | NA19660 | F | P | P                               | O,P | -  | NA19662 | F | O | O                               | O,P | -  |     |
| MEX | 0   | NA19660 | F | - | A,C,G,H,N                       | A   | -  | NA19664 | M | - | A,C,G,H,N                       | N   | -  | R,? |
| MEX | 0   | NA19660 | F | - | 1C,GA,GG<br>,HA,HN              | -   | GA | NA19665 | F | - | 1C,GC,GN<br>,HA,HN              | -   | GN | ?   |
| MEX | 0   | NA19660 | F | - | P                               | P   | -  | NA19685 | M | - | O                               | O   | -  | R   |
| MEX | 0   | NA19660 | F | - | G                               | G   | -  | NA19686 | F | - | C                               | C   | -  | R   |
| MEX | 0   | NA19661 | M | P | P                               | O,P | -  | NA19662 | F | O | O                               | O,P | -  |     |
| MEX | 0   | NA19661 | M | - | P                               | P   | -  | NA19685 | M | - | O                               | O   | -  | R   |
| MEX | 0   | NA19661 | M | - | G                               | G   | -  | NA19686 | F | - | C                               | C   | -  | R   |

|     |    |         |   |   |                    |     |    |         |   |   |                    |     |    |    |
|-----|----|---------|---|---|--------------------|-----|----|---------|---|---|--------------------|-----|----|----|
| MEX | 0  | NA19662 | F | - | 1C,GC,GN<br>,HA,HN | -   | 1C | NA19664 | M | - | 1C,GA,GG<br>,HA,HN | -   | 1C | ?  |
| MEX | 0  | NA19662 | F | - | F                  | F   | -  | NA19685 | M | - | F                  | F   | -  | R  |
| MEX | 0  | NA19662 | F | - | A                  | A   | -  | NA19686 | F | - | N                  | N   | -  | R  |
| MEX | 0  | NA19663 | F | P | P                  | O,P | -  | NA19665 | F | O | O                  | O,P | -  |    |
| MEX | 0  | NA19664 | M | P | P                  | O,P | -  | NA19665 | F | O | O                  | O,P | -  |    |
| MEX | 0  | NA19664 | M | - | 1C,GA,GG<br>,HA,HN | -   | 1C | NA19685 | M | - | 1C,GC,GN<br>,HA,HN | -   | 1C | ?  |
| MEX | 0  | NA19684 | F | P | P                  | O,P | -  | NA19686 | F | O | O                  | O,P | -  |    |
| MEX | 0  | NA19685 | M | P | P                  | O,P | -  | NA19686 | F | O | O                  | O,P | -  |    |
| MEX | 4  | NA19722 | F | P | P                  | O,P | -  | NA19724 | M | O | O                  | O,P | -  |    |
| MEX | 4  | NA19723 | M | P | P                  | O,P | -  | NA19724 | M | O | O                  | O,P | -  |    |
| MEX | 5  | NA19649 | M | P | O,P                | O,P | -  | NA19650 | M | O | O,P                | O,P | -  |    |
| MEX | 6  | NA19669 | F | P | P                  | O,P | -  | NA19671 | F | O | O                  | O,P | -  |    |
| MEX | 6  | NA19670 | M | P | P                  | O,P | -  | NA19671 | F | O | O                  | O,P | -  |    |
| MEX | 9  | NA19657 | F | P | P                  | O,P | -  | NA19659 | F | O | O                  | O,P | -  |    |
| MEX | 9  | NA19658 | M | P | P                  | O,P | -  | NA19659 | F | O | O                  | O,P | -  |    |
| MEX | 11 | NA19719 | F | P | P                  | O,P | -  | NA19721 | F | O | O                  | O,P | -  |    |
| MEX | 11 | NA19720 | M | P | P                  | O,P | -  | NA19721 | F | O | O                  | O,P | -  |    |
| MEX | 16 | NA19759 | M | P | O,P                | O,P | -  | NA19760 | F | O | O,P                | O,P | -  |    |
| MEX | 20 | NA19675 | F | P | P                  | O,P | -  | NA19677 | F | O | O                  | O,P | -  |    |
| MEX | 20 | NA19675 | F | - | O                  | O   | -  | NA19678 | F | - | P                  | P   | -  | R  |
| MEX | 20 | NA19675 | F | - | O                  | O   | -  | NA19679 | M | - | P                  | P   | -  | R  |
| MEX | 20 | NA19675 | F | - | F                  | F   | -  | NA19680 | F | - | F                  | F   | -  | R  |
| MEX | 20 | NA19676 | M | P | P                  | O,P | -  | NA19677 | F | O | O                  | O,P | -  |    |
| MEX | 20 | NA19677 | F | - | C                  | C   | -  | NA19678 | F | - | G                  | G   | -  | R* |
| MEX | 20 | NA19677 | F | - | C                  | C   | -  | NA19679 | M | - | G                  | G   | -  | R* |
| MEX | 20 | NA19677 | F | - | N                  | N   | -  | NA19680 | F | - | A                  | A   | -  | R  |
| MEX | 20 | NA19678 | F | P | P                  | O,P | -  | NA19680 | F | O | O                  | O,P | -  |    |
| MEX | 20 | NA19679 | M | P | P                  | O,P | -  | NA19680 | F | O | O                  | O,P | -  |    |
| MEX | 23 | NA19651 | F | P | P                  | O,P | -  | NA19653 | F | O | O                  | O,P | -  |    |
| MEX | 23 | NA19652 | M | P | P                  | O,P | -  | NA19653 | F | O | O                  | O,P | -  |    |
| MEX | 26 | NA19725 | F | P | P                  | O,P | -  | NA19727 | M | O | O                  | O,P | -  |    |
| MEX | 26 | NA19726 | M | P | P                  | O,P | -  | NA19727 | M | O | O                  | O,P | -  |    |
| MEX | 28 | NA19755 | F | P | P                  | O,P | -  | NA19757 | M | O | O                  | O,P | -  |    |
| MEX | 28 | NA19756 | M | P | P                  | O,P | -  | NA19757 | M | O | O                  | O,P | -  |    |
| MEX | 32 | NA19773 | F | P | P                  | O,P | -  | NA19775 | F | O | O                  | O,P | -  |    |
| MEX | 32 | NA19774 | M | P | P                  | O,P | -  | NA19775 | F | O | O                  | O,P | -  |    |
| MEX | 35 | NA19776 | F | P | P                  | O,P | -  | NA19778 | M | O | O                  | O,P | -  |    |
| MEX | 35 | NA19777 | M | P | P                  | O,P | -  | NA19778 | M | O | O                  | O,P | -  |    |
| MEX | 38 | NA19782 | F | P | P                  | O,P | -  | NA19784 | M | O | O                  | O,P | -  |    |
| MEX | 38 | NA19783 | M | P | P                  | O,P | -  | NA19784 | M | O | O                  | O,P | -  |    |
| MEX | 45 | NA19779 | F | P | P                  | O,P | -  | NA19781 | F | O | O                  | O,P | -  |    |
| MEX | 45 | NA19780 | M | P | P                  | O,P | -  | NA19781 | F | O | O                  | O,P | -  |    |
| MEX | 54 | NA19681 | F | P | P                  | O,P | -  | NA19683 | F | O | O                  | O,P | -  |    |
| MEX | 54 | NA19682 | M | P | P                  | O,P | -  | NA19683 | F | O | O                  | O,P | -  |    |

|     |    |         |   |   |                |     |   |         |   |   |                |     |   |     |
|-----|----|---------|---|---|----------------|-----|---|---------|---|---|----------------|-----|---|-----|
| MEX | 55 | NA19746 | F | P | P              | O,P | - | NA19748 | F | O | O              | O,P | - |     |
| MEX | 55 | NA19747 | M | P | P              | O,P | - | NA19748 | F | O | O              | O,P | - |     |
| MEX | 59 | NA19716 | F | P | O,P            | O,P | - | NA19718 | F | O | O,P            | O,P | - |     |
| MEX | 61 | NA19794 | F | P | P              | O,P | - | NA19796 | M | O | O              | O,P | - |     |
| MEX | 61 | NA19795 | M | P | P              | O,P | - | NA19796 | M | O | O              | O,P | - |     |
| MEX | 63 | NA19654 | F | P | O,P            | O,P | - | NA19656 | F | O | O,P            | O,P | - |     |
| MEX | 64 | NA19749 | F | P | P              | O,P | - | NA19751 | M | O | O              | O,P | - |     |
| MEX | 64 | NA19750 | M | P | P              | O,P | - | NA19751 | M | O | O              | O,P | - |     |
| MEX | 67 | NA19761 | F | P | P              | O,P | - | NA19763 | F | O | O              | O,P | - |     |
| MEX | 67 | NA19762 | M | P | P              | O,P | - | NA19763 | F | O | O              | O,P | - |     |
| MEX | 69 | NA19770 | F | P | P              | O,P | - | NA19772 | M | O | O              | O,P | - |     |
| MEX | 69 | NA19771 | M | P | P              | O,P | - | NA19772 | M | O | O              | O,P | - |     |
| MEX | 73 | NA19788 | F | P | P              | O,P | - | NA19790 | F | O | O              | O,P | - |     |
| MEX | 73 | NA19789 | M | P | P              | O,P | - | NA19790 | F | O | O              | O,P | - |     |
| MKK | 8  | NA21399 | M | P | P              | O,P | - | NA21401 | M | O | O              | O,P | - |     |
| MKK | 8  | NA21399 | M | - | F              | F   | - | NA21402 | M | - | F              | F   | - | R   |
| MKK | 8  | NA21399 | M | - | A              | A   | - | NA21404 | F | - | N              | N   | - | R*  |
| MKK | 8  | NA21399 | M | - | F              | F   | - | NA21405 | M | - | F              | F   | - | R   |
| MKK | 8  | NA21400 | F | P | P              | O,P | - | NA21401 | M | O | O              | O,P | - |     |
| MKK | 8  | NA21401 | M | - | N              | N   | - | NA21402 | M | - | A              | A   | - | R*  |
| MKK | 8  | NA21401 | M | - | 1C             | -   | - | NA21404 | F | - | 1C             | -   | - | N   |
| MKK | 8  | NA21401 | M | - | N              | N   | - | NA21405 | M | - | A              | A   | - | R   |
| MKK | 8  | NA21402 | M | P | P              | O,P | - | NA21404 | F | O | O              | O,P | - |     |
| MKK | 8  | NA21402 | M | - | F              | F   | - | NA21405 | M | - | F              | F   | - | R   |
| MKK | 8  | NA21403 | F | P | P              | O,P | - | NA21404 | F | O | O              | O,P | - |     |
| MKK | 8  | NA21404 | F | - | N              | N   | - | NA21405 | M | - | A              | A   | - | R*  |
| MKK | 16 | NA21716 | M | P | P              | O,P | - | NA21718 | M | O | O              | O,P | - |     |
| MKK | 16 | NA21716 | M | - | A,C,G,H,N      | A   | - | NA21741 | M | - | A,C,G,H,N      | N   | - | R,? |
| MKK | 16 | NA21717 | F | P | P              | O,P | - | NA21718 | M | O | O              | O,P | - |     |
| MKK | 16 | NA21718 | M | - | 1C,GC,GN,HA,HN | -   | - | NA21741 | M | - | 1C,GA,GG,HA,HN | -   | - | N   |
| MKK | 25 | NA21723 | F | - | A,C,G,H,N      | H   | - | NA21733 | F | - | A,C,G,H,N      | H   | - | R,? |
| MKK | 26 | NA21307 | M | P | P              | O,P | - | NA21309 | F | O | O              | O,P | - |     |
| MKK | 26 | NA21307 | M | - | A,C,G,H,N      | A   | - | NA21616 | M | - | A,C,G,H,N      | N   | - | R,? |
| MKK | 26 | NA21308 | F | P | P              | O,P | - | NA21309 | F | O | O              | O,P | - |     |
| MKK | 26 | NA21308 | F | - | A,C,G,H,N      | A   | - | NA21379 | F | - | A,C,G,H,N      | N   | - | R,? |
| MKK | 26 | NA21308 | F | - | A,C,G,H,N      | H   | - | NA21517 | F | - | A,C,G,H,N      | H   | - | R,? |
| MKK | 26 | NA21309 | F | - | 1C,GC,GN,HA,HN | -   | - | NA21379 | F | - | 1C,GA,GG,HA,HN | -   | - | N   |
| MKK | 26 | NA21309 | F | - | 1C,GC,GN,HA,HN | -   | - | NA21517 | F | - | 1C,GA,GG,HA,HN | -   | - | N   |
| MKK | 26 | NA21309 | F | - | 1C,GC,GN,HA,HN | -   | - | NA21616 | M | - | 1C,GA,GG,HA,HN | -   | - | N   |
| MKK | 26 | NA21379 | F | - | 1C,UN          | -   | - | NA21517 | F | - | 1C,UN          | -   | - | N   |
| MKK | 31 | NA21357 | F | - | F              | F   | - | NA21509 | M | - | F              | F   | - | R   |
| MKK | 40 | NA21381 | M | P | P              | O,P | - | NA21383 | M | O | O              | O,P | - |     |
| MKK | 40 | NA21382 | F | P | P              | O,P | - | NA21383 | M | O | O              | O,P | - |     |

|     |     |         |   |   |                                       |     |   |         |   |   |                                       |     |   |     |
|-----|-----|---------|---|---|---------------------------------------|-----|---|---------|---|---|---------------------------------------|-----|---|-----|
| MKK | 40  | NA21382 | F | - | 1C,GA,GG<br>,HA,HN                    | -   | - | NA21384 | M | - | 1C,GC,GN<br>,HA,HN                    | -   | - | N   |
| MKK | 40  | NA21382 | F | - | A,C,G,H,N                             | N   | - | NA21387 | M | - | A,C,G,H,N                             | A   | - | R,? |
| MKK | 40  | NA21382 | F | - | 1C,GA,GG<br>,HA,HN                    | -   | - | NA21389 | M | - | 1C,GC,GN<br>,HA,HN                    | -   | - | N   |
| MKK | 40  | NA21383 | M | - | 1C,GC,GN<br>,HA,HN                    | -   | - | NA21387 | M | - | 1C,GA,GG<br>,HA,HN                    | -   | - | N   |
| MKK | 40  | NA21384 | M | P | P                                     | O,P | - | NA21386 | F | O | O                                     | O,P | - |     |
| MKK | 40  | NA21384 | M | - | O                                     | O   | - | NA21387 | M | - | P                                     | P   | - | R   |
| MKK | 40  | NA21384 | M | - | O                                     | O   | - | NA21388 | F | - | P                                     | P   | - | R   |
| MKK | 40  | NA21384 | M | - | F                                     | F   | - | NA21389 | M | - | F                                     | F   | - | R   |
| MKK | 40  | NA21385 | F | P | P                                     | O,P | - | NA21386 | F | O | O                                     | O,P | - |     |
| MKK | 40  | NA21386 | F | - | C                                     | C   | - | NA21387 | M | - | G                                     | G   | - | R   |
| MKK | 40  | NA21386 | F | - | C                                     | C   | - | NA21388 | F | - | G                                     | G   | - | R   |
| MKK | 40  | NA21386 | F | - | N                                     | N   | - | NA21389 | M | - | A                                     | A   | - | R*  |
| MKK | 40  | NA21387 | M | P | P                                     | O,P | - | NA21389 | M | O | O                                     | O,P | - |     |
| MKK | 40  | NA21388 | F | P | P                                     | O,P | - | NA21389 | M | O | O                                     | O,P | - |     |
| MKK | 43  | NA21521 | M | - | A,C,G,H,N                             | U   | - | NA21599 | M | - | A,C,G,H,N                             | U   | - | R   |
| MKK | 43  | NA21521 | M | - | 1C,GA,GG<br>,HA,HN                    | -   | - | NA21601 | F | - | 1C,GC,GN<br>,HA,HN                    | -   | - | N   |
| MKK | 43  | NA21599 | M | P | P                                     | O,P | - | NA21601 | F | O | O                                     | O,P | - |     |
| MKK | 43  | NA21600 | F | P | P                                     | O,P | - | NA21601 | F | O | O                                     | O,P | - |     |
| MKK | 57  | NA21620 | F | - | A,C,G,H,N                             | U   | - | NA21719 | M | - | A,C,G,H,N                             | U   | - | R   |
| MKK | 68  | NA21574 | F | - | O,P                                   | U   | - | NA21575 | M | - | O,P                                   | U   | - | R   |
| MKK | 101 | NA21457 | F | - | F                                     | F   | - | NA21683 | F | - | F                                     | F   | - | R   |
| MKK | 105 | NA21363 | F | - | O,P                                   | U   | - | NA21415 | F | - | O,P                                   | U   | - | R   |
| MKK | 114 | NA21440 | M | P | P                                     | O,P | - | NA21442 | M | O | O                                     | O,P | - |     |
| MKK | 114 | NA21441 | F | P | P                                     | O,P | - | NA21442 | M | O | O                                     | O,P | - |     |
| MKK | 115 | NA21359 | M | P | P                                     | O,P | - | NA21361 | F | O | O                                     | O,P | - |     |
| MKK | 115 | NA21360 | F | P | P                                     | O,P | - | NA21361 | F | O | O                                     | O,P | - |     |
| MKK | 119 | NA21391 | F | - | A,C,G,H,N                             | H   | - | NA21421 | F | - | A,C,G,H,N                             | H   | - | R,? |
| MKK | 119 | NA21391 | F | - | 1C,UN<br>1C,GA,GC<br>,GG,GN,H<br>A,HN | -   | - | NA21478 | M | - | 1C,UN<br>1C,GA,GC<br>,GG,GN,H<br>A,HN | -   | - | N   |
| MKK | 119 | NA21391 | F | - | 1C,GA,GC<br>,GG,GN,H<br>A,HN,UN       | -   | - | NA21485 | M | - | 1C,GA,GC<br>,GG,GN,H<br>A,HN,UN       | -   | - | N   |
| MKK | 119 | NA21421 | F | - | 1C,UN                                 | -   | - | NA21488 | M | - | 1C,UN                                 | -   | - | N   |
| MKK | 119 | NA21421 | F | - | A,C,G,H,N                             | U   | - | NA21485 | M | - | A,C,G,H,N                             | U   | - | R   |
| MKK | 119 | NA21421 | F | - | 1C,GA,GG<br>,HA,HN                    | -   | - | NA21487 | F | - | 1C,GC,GN<br>,HA,HN                    | -   | - | N   |
| MKK | 119 | NA21421 | F | - | 1C,UN                                 | -   | - | NA21488 | M | - | 1C,UN                                 | -   | - | N   |
| MKK | 119 | NA21475 | M | P | P                                     | O,P | - | NA21477 | M | O | O                                     | O,P | - |     |
| MKK | 119 | NA21475 | M | - | 1C,GC,GN<br>,HA,HN                    | -   | - | NA21478 | M | - | 1C,GA,GG<br>,HA,HN                    | -   | - | N   |
| MKK | 119 | NA21475 | M | - | 1C,GC,GN<br>,HA,HN                    | -   | - | NA21485 | M | - | 1C,GA,GG<br>,HA,HN                    | -   | - | N   |
| MKK | 119 | NA21475 | M | - | O                                     | O   | - | NA21488 | M | - | P                                     | P   | - | R   |
| MKK | 119 | NA21475 | M | - | O                                     | O   | - | NA21489 | F | - | P                                     | P   | - | R   |
| MKK | 119 | NA21475 | M | - | F                                     | F   | - | NA21490 | M | - | F                                     | F   | - | R   |
| MKK | 119 | NA21476 | F | P | P                                     | O,P | - | NA21477 | M | O | O                                     | O,P | - |     |

|     |     |         |   |   |                                 |     |   |         |   |   |                                 |     |   |      |
|-----|-----|---------|---|---|---------------------------------|-----|---|---------|---|---|---------------------------------|-----|---|------|
| MKK | 119 | NA21477 | M | - | C                               | C   | - | NA21488 | M | - | G                               | G   | - | R    |
| MKK | 119 | NA21477 | M | - | C                               | C   | - | NA21489 | F | - | G                               | G   | - | R    |
| MKK | 119 | NA21477 | M | - | N                               | N   | - | NA21490 | M | - | A                               | A   | - | R    |
| MKK | 119 | NA21478 | M | P | P                               | O,P | - | NA21480 | F | O | O                               | O,P | - |      |
| MKK | 119 | NA21478 | M | - | 1C,GA,GC<br>,GG,GN,H<br>A,HN,UN | -   | - | NA21485 | M | - | 1C,GA,GC<br>,GG,GN,H<br>A,HN,UN | -   | - | N    |
| MKK | 119 | NA21478 | M | - | GC,UN                           | -   | - | NA21487 | F | - | GG,UN                           | -   | - | N    |
| MKK | 119 | NA21478 | M | - | A,C,G,H,N                       | U   | - | NA21488 | M | - | A,C,G,H,N                       | U   | - | R    |
| MKK | 119 | NA21478 | M | - | 1C,GA,GG<br>,HA,HN              | -   | - | NA21490 | M | - | 1C,GC,GN<br>,HA,HN              | -   | - | N    |
| MKK | 119 | NA21479 | F | P | P                               | O,P | - | NA21480 | F | O | O                               | O,P | - |      |
| MKK | 119 | NA21479 | F | - | A,C,G,H,N                       | H   | - | NA21685 | M | - | A,C,G,H,N                       | H   | - | R,?  |
| MKK | 119 | NA21480 | F | - | 1C,GC,GN<br>,HA,HN              | -   | - | NA21488 | M | - | 1C,GA,GG<br>,HA,HN              | -   | - | N    |
| MKK | 119 | NA21480 | F | - | 1C,GC,GN<br>,HA,HN              | -   | - | NA21685 | M | - | 1C,GA,GG<br>,HA,HN              | -   | - | N    |
| MKK | 119 | NA21485 | M | P | P                               | O,P | - | NA21487 | F | O | O                               | O,P | - |      |
| MKK | 119 | NA21485 | M | - | A,C,G,H,N                       | U   | - | NA21488 | M | - | A,C,G,H,N                       | U   | - | R    |
| MKK | 119 | NA21485 | M | - | 1C,GA,GG<br>,HA,HN              | -   | - | NA21490 | M | - | 1C,GC,GN<br>,HA,HN              | -   | - | N    |
| MKK | 119 | NA21486 | F | P | P                               | O,P | - | NA21487 | F | O | O                               | O,P | - |      |
| MKK | 119 | NA21487 | F | - | 1C,GC,GN<br>,HA,HN              | -   | - | NA21488 | M | - | 1C,GA,GG<br>,HA,HN              | -   | - | N    |
| MKK | 119 | NA21488 | M | P | P                               | O,P | - | NA21490 | M | O | O                               | O,P | - |      |
| MKK | 119 | NA21489 | F | P | P                               | O,P | - | NA21490 | M | O | O                               | O,P | - |      |
| MKK | 125 | NA21352 | M | - | A,C,G,H,N                       | U   | - | NA21414 | M | - | A,C,G,H,N                       | U   | - | R    |
| MKK | 125 | NA21352 | M | - | 1C,GA,GG<br>,HA,HN              | -   | - | NA21527 | M | - | 1C,GC,GN<br>,HA,HN              | -   | - | N    |
| MKK | 125 | NA21352 | M | - | A,C,G,H,N                       | U   | - | NA21583 | M | - | A,C,G,H,N                       | U   | - | R    |
| MKK | 125 | NA21414 | M | - | 1C,UN                           | -   | - | NA21583 | M | - | 1C,UN                           | -   | - | N    |
| MKK | 125 | NA21526 | F | P | P                               | O,P | - | NA21527 | M | O | O                               | O,P | - |      |
| MKK | 125 | NA21527 | M | O | O                               | O,P | - | NA21583 | M | P | P                               | O,P | - |      |
| MKK | 131 | NA21300 | F | - | 1C,GA,GG<br>,HA,HN,U<br>N       | -   | - | NA21312 | M | - | 1C,GC,GN<br>,HA,HN,U<br>N       | -   | - | N    |
| MKK | 131 | NA21300 | F | - | 1C,GA,GG<br>,HA,HN,U<br>N       | -   | - | NA21370 | M | - | 1C,GC,GN<br>,HA,HN,U<br>N       | -   | - | N    |
| MKK | 131 | NA21300 | F | - | 1C,UN                           | -   | - | NA21435 | M | - | 1C,UN                           | -   | - | N    |
| MKK | 131 | NA21300 | F | - | A,G,H,N                         | G   | - | NA21520 | M | - | A,C,H,N                         | C   | - | R*,? |
| MKK | 131 | NA21300 | F | - | A,G,H,N                         | G   | - | NA21613 | F | - | A,C,H,N                         | C   | - | R,?  |
| MKK | 131 | NA21300 | F | - | A,C,G,H,N                       | H   | - | NA21617 | F | - | A,C,G,H,N                       | H   | - | R,?  |
| MKK | 131 | NA21300 | F | - | 1C,UN                           | -   | - | NA21647 | M | - | 1C,UN                           | -   | - | N    |
| MKK | 131 | NA21300 | F | - | 1C,UN                           | -   | - | NA21686 | F | - | 1C,UN                           | -   | - | N    |
| MKK | 131 | NA21300 | F | - | 1C,UN                           | -   | - | NA21825 | F | - | 1C,UN                           | -   | - | N    |
| MKK | 131 | NA21301 | M | P | P                               | O,P | - | NA21302 | F | O | O                               | O,P | - |      |
| MKK | 131 | NA21301 | M | - | F                               | F   | - | NA21344 | M | - | F                               | F   | - | R    |
| MKK | 131 | NA21301 | M | - | A                               | A   | - | NA21366 | M | - | N                               | N   | - | R*   |
| MKK | 131 | NA21302 | F | O | O                               | O,P | - | NA21303 | F | P | P                               | O,P | - |      |
| MKK | 131 | NA21302 | F | - | N                               | N   | - | NA21344 | M | - | A                               | A   | - | R*   |
| MKK | 131 | NA21302 | F | - | 1C                              | -   | - | NA21366 | M | - | 1C                              | -   | - | N    |
| MKK | 131 | NA21311 | M | - | G,H                             | H   | - | NA21312 | M | - | C,H                             | H   | - | R*,? |



|     |     |         |   |   |                                    |     |   |         |   |   |                                    |     |   |      |
|-----|-----|---------|---|---|------------------------------------|-----|---|---------|---|---|------------------------------------|-----|---|------|
| MKK | 131 | NA21311 | M | - | GG,HA                              | -   | - | NA21313 | M | - | GC,HN                              | -   | - | N    |
| MKK | 131 | NA21311 | M | - | O,P                                | O   | - | NA21314 | M | - | O,P                                | P   | - | R,?  |
| MKK | 131 | NA21311 | M | - | G,H                                | C   | - | NA21320 | F | - | C,H                                | G   | - | R,?  |
| MKK | 131 | NA21311 | M | - | 1C,GC,GG,<br>GN,HA,H<br>N,UN       | -   | - | NA21367 | M | - | 1C,GA,GC,<br>GG,HA,H<br>N,UN       | -   | - | N    |
| MKK | 131 | NA21311 | M | - | 1C,UN                              | -   | - | NA21424 | F | - | 1C,UN                              | -   | - | N    |
| MKK | 131 | NA21311 | M | - | 1C,UN                              | -   | - | NA21596 | M | - | 1C,UN                              | -   | - | N    |
| MKK | 131 | NA21312 | M | P | P                                  | O,P | - | NA21313 | M | O | O                                  | O,P | - |      |
| MKK | 131 | NA21312 | M | - | O                                  | O   | - | NA21314 | M | - | P                                  | P   | - | R    |
| MKK | 131 | NA21312 | M | - | G,H                                | C   | - | NA21320 | F | - | C,H                                | G   | - | R*,? |
| MKK | 131 | NA21312 | M | - | 1C,GC,GN,<br>HA,HN                 | -   | - | NA21367 | M | - | 1C,GA,GC,<br>HA,HN                 | -   | - | N    |
| MKK | 131 | NA21312 | M | - | H                                  | U   | - | NA21370 | M | - | H                                  | U   | - | R,P  |
| MKK | 131 | NA21312 | M | - | 1C,GA,GC,<br>GG,GN,H<br>A,HN,UN    | -   | - | NA21423 | M | - | 1C,GA,GC,<br>GG,GN,H<br>A,HN,UN    | -   | - | N    |
| MKK | 131 | NA21312 | M | - | 1C,UN                              | -   | - | NA21424 | F | - | 1C,UN                              | -   | - | N    |
| MKK | 131 | NA21312 | M | - | 1C,UN                              | -   | - | NA21447 | M | - | 1C,UN                              | -   | - | N    |
| MKK | 131 | NA21312 | M | - | 1C,GC,GN,<br>HA,HN,U<br>N          | -   | - | NA21520 | M | - | 1C,GA,GC,<br>HA,HN,U<br>N          | -   | - | N    |
| MKK | 131 | NA21312 | M | - | 1C,UN                              | -   | - | NA21596 | M | - | 1C,UN                              | -   | - | N    |
| MKK | 131 | NA21312 | M | - | 1C,GC,GN,<br>HA,HN,U<br>N          | -   | - | NA21613 | F | - | 1C,GA,GC,<br>HA,HN,U<br>N          | -   | - | N    |
| MKK | 131 | NA21312 | M | - | C,H,N                              | U   | - | NA21617 | F | - | A,G,H                              | U   | - | R,P  |
| MKK | 131 | NA21313 | M | - | C                                  | C   | - | NA21314 | M | - | G                                  | G   | - | R    |
| MKK | 131 | NA21313 | M | - | HA,HN                              | -   | - | NA21320 | F | - | HA,HN                              | -   | - | N    |
| MKK | 131 | NA21313 | M | O | O                                  | O,P | - | NA21362 | F | P | P                                  | O,P | - |      |
| MKK | 131 | NA21313 | M | - | HN                                 | -   | - | NA21370 | M | - | HA                                 | -   | - | N    |
| MKK | 131 | NA21313 | M | - | 1C,GC,GN,<br>HA,HN<br>GC,GN,H<br>N | -   | - | NA21438 | F | - | 1C,GA,GC,<br>HA,HN<br>GA,GC,H<br>A | -   | - | N    |
| MKK | 131 | NA21313 | M | - |                                    |     |   | NA21617 | F | - |                                    |     |   | N    |
| MKK | 131 | NA21314 | M | - | P                                  | O   | - | NA21320 | F | - | O                                  | P   | - | R    |
| MKK | 131 | NA21314 | M | - | A,C,G,H,N                          | H   | - | NA21367 | M | - | A,C,G,H,N                          | H   | - | R,?  |
| MKK | 131 | NA21314 | M | - | 1C,UN                              | -   | - | NA21378 | M | - | 1C,UN                              | -   | - | N    |
| MKK | 131 | NA21314 | M | - | 1C,GA,GC,<br>GG,GN,H<br>A,HN,UN    | -   | - | NA21423 | M | - | 1C,GA,GC,<br>GG,GN,H<br>A,HN,UN    | -   | - | N    |
| MKK | 131 | NA21314 | M | - | 1C,UN                              | -   | - | NA21424 | F | - | 1C,UN                              | -   | - | N    |
| MKK | 131 | NA21314 | M | - | GC,UN                              | -   | - | NA21425 | F | - | GG,UN                              | -   | - | N    |
| MKK | 131 | NA21314 | M | - | 1C,UN                              | -   | - | NA21447 | M | - | 1C,UN                              | -   | - | N    |
| MKK | 131 | NA21314 | M | - | 1C,UN                              | -   | - | NA21493 | F | - | 1C,UN                              | -   | - | N    |
| MKK | 131 | NA21314 | M | - | 1C,UN                              | -   | - | NA21596 | M | - | 1C,UN                              | -   | - | N    |
| MKK | 131 | NA21316 | M | P | P                                  | O,P | - | NA21317 | M | O | O                                  | O,P | - |      |
| MKK | 131 | NA21316 | M | - | F                                  | F   | - | NA21318 | M | - | F                                  | F   | - | R    |
| MKK | 131 | NA21316 | M | - | A,C,H,N                            | C   | - | NA21519 | M | - | A,G,H,N                            | G   | - | R,?  |
| MKK | 131 | NA21316 | M | - | 1C,UN                              | -   | - | NA21619 | M | - | 1C,UN                              | -   | - | N    |
| MKK | 131 | NA21316 | M | - | 1C,GA,GC,<br>GG,GN,H<br>A,HN,UN    | -   | - | NA21635 | F | - | 1C,GA,GC,<br>GG,GN,H<br>A,HN,UN    | -   | - | N    |
| MKK | 131 | NA21316 | M | - | 1C,GA,GC,<br>GG,GN,H<br>A,HN,UN    | -   | - | NA21678 | M | - | 1C,GA,GC,<br>GG,GN,H<br>A,HN,UN    | -   | - | N    |

|     |     |         |   |   |           |          |         |         |         |   |           |          |          |         |   |   |   |
|-----|-----|---------|---|---|-----------|----------|---------|---------|---------|---|-----------|----------|----------|---------|---|---|---|
| MKK | 131 | NA21317 | M | - | N         | N        | -       | NA21318 | M       | - | A         | A        | -        | R       |   |   |   |
| MKK | 131 | NA21317 | M | - | 1C,GC,GN  | ,HN      | -       | NA21519 | M       | - | 1C,GA,GG  | ,HA      | -        | N       |   |   |   |
| MKK | 131 | NA21317 | M | O | O         | O,P      | -       | NA21580 | F       | P | P         | O,P      | -        |         |   |   |   |
| MKK | 131 | NA21318 | M | - | A,C,H,N   | C        | -       | NA21519 | M       | - | A,G,H,N   | G        | -        | R,?     |   |   |   |
| MKK | 131 | NA21318 | M | - | 1C,UN     | -        | -       | NA21619 | M       | - | 1C,UN     | -        | -        | N       |   |   |   |
| MKK | 131 | NA21318 | M | - | 1C,GA,GC  | ,GG,GN,H | A,HN,UN | -       | NA21635 | F | -         | 1C,GA,GC | ,GG,GN,H | A,HN,UN | - | - | N |
| MKK | 131 | NA21318 | M | - | 1C,GA,GC  | ,GG,GN,H | A,HN,UN | -       | NA21678 | M | -         | 1C,GA,GC | ,GG,GN,H | A,HN,UN | - | - | N |
| MKK | 131 | NA21320 | F | - | H,N       | H        | -       | NA21365 | F       | - | A,H       | H        | -        | R,?     |   |   |   |
| MKK | 131 | NA21320 | F | - | 1C,HA     | -        | -       | NA21366 | M       | - | 1C,HN     | -        | -        | N       |   |   |   |
| MKK | 131 | NA21320 | F | - | 1C,GC,GN  | ,HA,HN   | -       | NA21367 | M       | - | 1C,GA,GG  | ,HA,HN   | -        | -       | N |   |   |
| MKK | 131 | NA21320 | F | - | 1C,GA,GC  | ,GG,GN,H | A,HN,UN | -       | NA21423 | M | -         | 1C,GA,GC | ,GG,GN,H | A,HN,UN | - | - | N |
| MKK | 131 | NA21320 | F | - | 1C,UN     | -        | -       | NA21424 | F       | - | 1C,UN     | -        | -        | N       |   |   |   |
| MKK | 131 | NA21320 | F | - | 1C,UN     | -        | -       | NA21447 | M       | - | 1C,UN     | -        | -        | N       |   |   |   |
| MKK | 131 | NA21320 | F | - | H,N       | H        | -       | NA21523 | M       | - | A,H       | H        | -        | R*,?    |   |   |   |
| MKK | 131 | NA21320 | F | - | 1C,HA     | -        | -       | NA21525 | M       | - | 1C,HN     | -        | -        | N       |   |   |   |
| MKK | 131 | NA21320 | F | - | 1C,UN     | -        | -       | NA21596 | M       | - | 1C,UN     | -        | -        | N       |   |   |   |
| MKK | 131 | NA21344 | M | P | P         | O,P      | -       | NA21366 | M       | O | O         | O,P      | -        |         |   |   |   |
| MKK | 131 | NA21362 | F | - | A,C,G,H,N | H        | -       | NA21438 | F       | - | A,C,G,H,N | H        | -        | R*,?    |   |   |   |
| MKK | 131 | NA21362 | F | - | 1C,GA,GG  | ,HA,HN   | -       | NA21439 | M       | - | 1C,GC,GN  | ,HA,HN   | -        | -       | N |   |   |
| MKK | 131 | NA21362 | F | - | 1C,GN,HA  | ,HN,UN   | -       | NA21528 | M       | - | 1C,GA,HA  | ,HN,UN   | -        | -       | N |   |   |
| MKK | 131 | NA21362 | F | - | 1C,GN,HA  | ,HN,UN   | -       | NA21587 | M       | - | 1C,GA,HA  | ,HN,UN   | -        | -       | N |   |   |
| MKK | 131 | NA21365 | F | P | P         | O,P      | -       | NA21366 | M       | O | O         | O,P      | -        |         |   |   |   |
| MKK | 131 | NA21365 | F | - | F         | F        | -       | NA21523 | M       | - | F         | F        | -        | R       |   |   |   |
| MKK | 131 | NA21365 | F | - | A         | A        | -       | NA21525 | M       | - | N         | N        | -        | R*      |   |   |   |
| MKK | 131 | NA21366 | M | - | N         | N        | -       | NA21523 | M       | - | A         | A        | -        | R       |   |   |   |
| MKK | 131 | NA21366 | M | - | 1C        | -        | -       | NA21525 | M       | - | 1C        | -        | -        | N       |   |   |   |
| MKK | 131 | NA21367 | M | - | 1C,GA,GN  | ,HA,HN,U | N       | -       | NA21378 | M | -         | 1C,GA,GN | ,HA,HN,U | N       | - | - | N |
| MKK | 131 | NA21367 | M | - | 1C,UN     | -        | -       | NA21423 | M       | - | 1C,UN     | -        | -        | N       |   |   |   |
| MKK | 131 | NA21367 | M | - | 1C,UN     | -        | -       | NA21424 | F       | - | 1C,UN     | -        | -        | N       |   |   |   |
| MKK | 131 | NA21367 | M | - | 1C,UN     | -        | -       | NA21447 | M       | - | 1C,UN     | -        | -        | N       |   |   |   |
| MKK | 131 | NA21367 | M | - | 1C,GA,GN  | ,HA,HN,U | N       | -       | NA21493 | F | -         | 1C,GA,GN | ,HA,HN,U | N       | - | - | N |
| MKK | 131 | NA21367 | M | - | 1C,GC,UN  | -        | -       | NA21596 | M       | - | 1C,GG,U   | N        | -        | -       | N |   |   |
| MKK | 131 | NA21370 | M | - | H         | H        | -       | NA21494 | F       | - | H         | H        | -        | R       |   |   |   |
| MKK | 131 | NA21370 | M | - | 1C,GC,GN  | ,HA,HN,U | N       | -       | NA21520 | M | -         | 1C,GA,GG | ,HA,HN,U | N       | - | - | N |
| MKK | 131 | NA21370 | M | - | O         | O        | -       | NA21522 | M       | - | P         | P        | -        | R       |   |   |   |
| MKK | 131 | NA21370 | M | - | 1C,GN,HA  | ,HN      | -       | NA21528 | M       | - | 1C,GA,HA  | ,HN      | -        | -       | N |   |   |
| MKK | 131 | NA21370 | M | - | 1C,GN,HA  | ,HN      | -       | NA21587 | M       | - | 1C,GA,HA  | ,HN      | -        | -       | N |   |   |
| MKK | 131 | NA21370 | M | - | 1C,GC,GN  | ,HA,HN,U | N       | -       | NA21613 | F | -         | 1C,GA,GG | ,HA,HN,U | N       | - | - | N |
| MKK | 131 | NA21370 | M | - | C,H,N     | U        | -       | NA21617 | F       | - | A,G,H     | U        | -        | R,P     |   |   |   |

|     |     |         |   |   |                                                                  |     |   |         |   |   |                                  |     |   |      |
|-----|-----|---------|---|---|------------------------------------------------------------------|-----|---|---------|---|---|----------------------------------|-----|---|------|
| MKK | 131 | NA21370 | M | - | C,H                                                              | H   | - | NA21682 | M | - | G,H                              | H   | - | R,?  |
| MKK | 131 | NA21378 | M | - | A,C,H,N                                                          | C   | - | NA21448 | M | - | A,G,H,N                          | G   | - | R,?  |
| MKK | 131 | NA21378 | M | - | A,C,H,N                                                          | U   | - | NA21453 | M | - | A,G,H,N                          | U   | - | RS,P |
| MKK | 131 | NA21378 | M | - | 1C,GA,HA,HN                                                      | -   | - | NA21455 | F | - | 1C,GN,HA,HN                      | -   | - | N    |
| MKK | 131 | NA21378 | M | - | F                                                                | F   | - | NA21493 | F | - | F                                | F   | - | R    |
| MKK | 131 | NA21378 | M | - | A                                                                | A   | - | NA21494 | F | - | N                                | N   | - | R*   |
| MKK | 131 | NA21423 | M | P | P                                                                | O,P | - | NA21425 | F | O | O                                | O,P | - |      |
| MKK | 131 | NA21423 | M | - | 1C,GA,GG,HA,HN                                                   | -   | - | NA21439 | M | - | 1C,GC,GN,HA,HN                   | -   | - | N    |
| MKK | 131 | NA21423 | M | - | A,C,G,H,N                                                        | A   | - | NA21447 | M | - | A,C,G,H,N                        | N   | - | R,?  |
| MKK | 131 | NA21424 | F | P | P                                                                | O,P | - | NA21425 | F | O | O                                | O,P | - |      |
| MKK | 131 | NA21424 | F | - | F                                                                | F   | - | NA21596 | M | - | F                                | F   | - | R    |
| MKK | 131 | NA21425 | F | - | 1C,GC,GN,HA,HN                                                   | -   | - | NA21447 | M | - | 1C,GA,GG,HA,HN                   | -   | - | N    |
| MKK | 131 | NA21425 | F | - | N                                                                | N   | - | NA21596 | M | - | A                                | A   | - | R    |
| MKK | 131 | NA21435 | M | - | 1C,UN                                                            | -   | - | NA21520 | M | - | 1C,UN                            | -   | - | N    |
| MKK | 131 | NA21435 | M | - | 1C,UN                                                            | -   | - | NA21613 | F | - | 1C,UN                            | -   | - | N    |
| MKK | 131 | NA21435 | M | - | 1C,GA,GC,GG,GN,H,A,HN,UN                                         | -   | - | NA21617 | F | - | 1C,GA,GC,GG,GN,H,A,HN,UN         | -   | - | N    |
| MKK | 131 | NA21435 | M | - | A,C,G,H,N                                                        | U   | - | NA21634 | M | - | A,C,G,H,N                        | U   | - | R    |
| MKK | 131 | NA21435 | M | - | 1C,GA,GG,HA,HN,1C,A,C,G,GA,GC,G,G,GN,H,H,A,HN,N,1C,GA,GG,HA,HN,U | U   | - | NA21647 | M | - | 1C,GC,GN,HA,HN,U                 | U   | - | R    |
| MKK | 131 | NA21435 | M | - | N                                                                | -   | - | NA21648 | M | - | N                                | -   | - | N    |
| MKK | 131 | NA21435 | M | - | A,C,G,H,N                                                        | H   | - | NA21825 | F | - | A,C,G,H,N                        | H   | - | R,?  |
| MKK | 131 | NA21438 | F | P | P                                                                | O,P | - | NA21439 | M | O | O                                | O,P | - |      |
| MKK | 131 | NA21439 | M | O | O                                                                | O,P | - | NA21447 | M | P | P                                | O,P | - |      |
| MKK | 131 | NA21448 | M | - | A,C,G,H,N                                                        | H   | - | NA21453 | M | - | A,C,G,H,N                        | H   | - | R,?  |
| MKK | 131 | NA21448 | M | - | 1C,GA,GG,HA,HN                                                   | -   | - | NA21455 | F | - | 1C,GC,GN,HA,HN                   | -   | - | N    |
| MKK | 131 | NA21448 | M | - | A,G,H,N,1C,GA,GG,HA                                              | G   | - | NA21493 | F | - | A,C,H,N,1C,GC,GN,HA              | C   | - | R,?  |
| MKK | 131 | NA21448 | M | - | HA                                                               | -   | - | NA21494 | F | - | HN                               | -   | - | N    |
| MKK | 131 | NA21453 | M | P | P                                                                | O,P | - | NA21455 | F | O | O                                | O,P | - |      |
| MKK | 131 | NA21453 | M | - | A,G,H,N                                                          | U   | - | NA21493 | F | - | A,C,H,N                          | U   | - | RS,P |
| MKK | 131 | NA21453 | M | - | 1C,GA,GG,HA                                                      | -   | - | NA21494 | F | - | 1C,GC,GN,HA,HN                   | -   | - | N    |
| MKK | 131 | NA21454 | F | P | P                                                                | O,P | - | NA21455 | F | O | O                                | O,P | - |      |
| MKK | 131 | NA21455 | F | - | 1C,GN,HA,HN                                                      | -   | - | NA21493 | F | - | 1C,GA,HA,HN                      | -   | - | N    |
| MKK | 131 | NA21493 | F | P | P                                                                | O,P | - | NA21494 | F | O | O                                | O,P | - |      |
| MKK | 131 | NA21494 | F | O | O                                                                | O,P | - | NA21522 | M | P | P                                | O,P | - |      |
| MKK | 131 | NA21494 | F | - | 1C,GN,HA,HN                                                      | -   | - | NA21528 | M | - | 1C,GA,HA,HN                      | -   | - | N    |
| MKK | 131 | NA21494 | F | - | 1C,GN,HA,HN                                                      | -   | - | NA21587 | M | - | 1C,GA,HA,HN                      | -   | - | N    |
| MKK | 131 | NA21494 | F | - | C,H                                                              | H   | - | NA21682 | M | - | G,H                              | H   | - | R,?  |
| MKK | 131 | NA21519 | M | - | 1C,UN,1C,C,GA,GC,GG,G,N,HA,HN,UN                                 | G   | - | NA21619 | M | - | 1C,UN,1C,G,GA,GC,GG,G,N,HA,HN,UN | -   | - | N    |
| MKK | 131 | NA21519 | M | - | GC,HN,U                                                          | -   | - | NA21635 | F | - | GG,HA,U                          | C   | - | R,?  |
| MKK | 131 | NA21519 | M | - | N                                                                | -   | - | NA21636 | F | - | N                                | -   | - | N    |

|     |     |         |   |   |                                      |     |   |         |   |   |                                      |     |   |      |
|-----|-----|---------|---|---|--------------------------------------|-----|---|---------|---|---|--------------------------------------|-----|---|------|
| MKK | 131 | NA21519 | M | - | 1C,GA,GC<br>,GG,GN,H<br>A,HN,UN      | G   | - | NA21678 | M | - | 1C,GA,GC<br>,GG,GN,H<br>A,HN,UN      | C   | - | R*,? |
| MKK | 131 | NA21520 | M | - | F                                    | F   | - | NA21613 | F | - | F                                    | F   | - | R    |
| MKK | 131 | NA21520 | M | - | A,C,H,N                              | U   | - | NA21617 | F | - | A,G,H,N                              | U   | - | RS,P |
| MKK | 131 | NA21520 | M | - | 1C,GA,HA<br>,HN                      | -   | - | NA21648 | M | - | 1C,GN,HA<br>,HN                      | -   | - | N    |
| MKK | 131 | NA21520 | M | - | A,C,H,N                              | N   | - | NA21686 | F | - | A,G,H,N                              | A   | - | R,?  |
| MKK | 131 | NA21520 | M | - | 1C,UN                                | -   | - | NA21825 | F | - | 1C,UN                                | -   | - | N    |
| MKK | 131 | NA21522 | M | - | A,G,H,N                              | H   | - | NA21528 | M | - | A,C,H,N                              | H   | - | R,?  |
| MKK | 131 | NA21522 | M | - | A,G,H,N                              | H   | - | NA21587 | M | - | A,C,H,N                              | H   | - | R*,? |
| MKK | 131 | NA21522 | M | - | O,P                                  | P   | - | NA21682 | M | - | O,P                                  | O   | - | R,?  |
| MKK | 131 | NA21523 | M | P | P                                    | O,P | - | NA21525 | M | O | O                                    | O,P | - |      |
| MKK | 131 | NA21524 | F | P | P                                    | O,P | - | NA21525 | M | O | O                                    | O,P | - |      |
| MKK | 131 | NA21528 | M | - | F                                    | F   | - | NA21587 | M | - | F                                    | F   | - | R    |
| MKK | 131 | NA21528 | M | - | 1C,GA,GC<br>,HA,HN,U<br>N            | -   | - | NA21682 | M | - | 1C,GG,G<br>N,HA,HN,<br>UN            | -   | - | N    |
| MKK | 131 | NA21587 | M | - | 1C,GA,GC<br>,HA,HN,U<br>N            | -   | - | NA21682 | M | - | 1C,GG,G<br>N,HA,HN,<br>UN            | -   | - | N    |
| MKK | 131 | NA21613 | F | - | A,C,H,N                              | U   | - | NA21617 | F | - | A,G,H,N                              | U   | - | RS,P |
| MKK | 131 | NA21613 | F | - | 1C,GA,HA<br>,HN                      | -   | - | NA21648 | M | - | 1C,GN,HA<br>,HN                      | -   | - | N    |
| MKK | 131 | NA21613 | F | - | A,C,H,N                              | N   | - | NA21686 | F | - | A,G,H,N                              | A   | - | R,?  |
| MKK | 131 | NA21613 | F | - | 1C,UN                                | -   | - | NA21825 | F | - | 1C,UN                                | -   | - | N    |
| MKK | 131 | NA21617 | F | - | 1C,UN                                | -   | - | NA21647 | M | - | 1C,UN                                | -   | - | N    |
| MKK | 131 | NA21617 | F | - | 1C,UN                                | -   | - | NA21686 | F | - | 1C,UN                                | -   | - | N    |
| MKK | 131 | NA21617 | F | - | 1C,GA,GC<br>,GG,GN,H<br>A,HN,UN      | -   | - | NA21825 | F | - | 1C,GA,GC<br>,GG,GN,H<br>A,HN,UN      | -   | - | N    |
| MKK | 131 | NA21619 | M | - | A,C,G,H,N                            | H   | - | NA21635 | F | - | A,C,G,H,N                            | H   | - | R*,? |
| MKK | 131 | NA21619 | M | - | 1C,GA,GG<br>,HA,HN<br>A,G,GN,H<br>,N | -   | - | NA21636 | F | - | 1C,GC,GN<br>,HA,HN<br>A,C,GA,H,<br>N | -   | - | N    |
| MKK | 131 | NA21619 | M | - | A,G,GN,H<br>,N                       | H   | - | NA21678 | M | - | A,C,GA,H,<br>N                       | H   | - | R,?  |
| MKK | 131 | NA21634 | M | P | P                                    | O,P | - | NA21636 | F | O | O                                    | O,P | - |      |
| MKK | 131 | NA21634 | M | - | A,C,G,H,N                            | U   | - | NA21647 | M | - | A,C,G,H,N                            | U   | - | R    |
| MKK | 131 | NA21634 | M | - | 1C,GA,GG<br>,HA,HN                   | -   | - | NA21648 | M | - | 1C,GC,GN<br>,HA,HN                   | -   | - | N    |
| MKK | 131 | NA21634 | M | - | 1C,UN                                | -   | - | NA21825 | F | - | 1C,UN                                | -   | - | N    |
| MKK | 131 | NA21635 | F | P | P                                    | O,P | - | NA21636 | F | O | O                                    | O,P | - |      |
| MKK | 131 | NA21635 | F | - | F                                    | F   | - | NA21678 | M | - | F                                    | F   | - | R    |
| MKK | 131 | NA21636 | F | - | 1C,GC,GN<br>,HA,HN                   | -   | - | NA21647 | M | - | 1C,GA,GG<br>,HA,HN                   | -   | - | N    |
| MKK | 131 | NA21636 | F | - | N                                    | N   | - | NA21678 | M | - | A                                    | A   | - | R    |
| MKK | 131 | NA21647 | M | P | P                                    | O,P | - | NA21648 | M | O | O                                    | O,P | - |      |
| MKK | 131 | NA21647 | M | - | 1C,UN                                | -   | - | NA21825 | F | - | 1C,UN                                | -   | - | N    |
| MKK | 131 | NA21648 | M | O | O                                    | O,P | - | NA21686 | F | P | P                                    | O,P | - |      |
| MKK | 169 | NA21573 | M | - | F                                    | F   | - | NA21577 | M | - | F                                    | F   | - | R    |
| YRI | 2   | NA19184 | M | P | P                                    | O,P | - | NA19186 | M | O | O                                    | O,P | - |      |
| YRI | 2   | NA19185 | F | P | P                                    | O,P | - | NA19186 | M | O | O                                    | O,P | - |      |
| YRI | 3   | NA19146 | M | P | P                                    | O,P | - | NA19148 | F | O | O                                    | O,P | - |      |
| YRI | 3   | NA19147 | F | P | P                                    | O,P | - | NA19148 | F | O | O                                    | O,P | - |      |
| YRI | 11  | NA19178 | M | P | P                                    | O,P | - | NA19180 | F | O | O                                    | O,P | - |      |

|     |    |         |   |   |                                 |     |   |         |   |   |                                 |     |   |   |
|-----|----|---------|---|---|---------------------------------|-----|---|---------|---|---|---------------------------------|-----|---|---|
| YRI | 11 | NA19178 | M | - | 1C,GA,GC<br>,GG,GN,H<br>A,HN,UN | -   | U | NA19200 | M | - | 1C,GA,GC<br>,GG,GN,H<br>A,HN,UN | -   | U |   |
| YRI | 11 | NA19178 | M | - | GC,UN                           | -   | U | NA19202 | F | - | GG,UN                           | -   | U | P |
| YRI | 11 | NA19179 | F | P | P                               | O,P | - | NA19180 | F | O | O                               | O,P | - |   |
| YRI | 11 | NA19180 | F | - | GG,UN                           | -   | U | NA19200 | M | - | GC,UN                           | -   | U | P |
| YRI | 11 | NA19200 | M | P | P                               | O,P | - | NA19202 | F | O | O                               | O,P | - |   |
| YRI | 11 | NA19201 | F | P | P                               | O,P | - | NA19202 | F | O | O                               | O,P | - |   |
| YRI | 12 | NA18484 | F | O | O                               | O,P | - | NA18486 | M | P | P                               | O,P | - |   |
| YRI | 12 | NA18484 | F | O | O                               | O,P | - | NA18488 | F | P | P                               | O,P | - |   |
| YRI | 15 | NA19189 | M | P | P                               | O,P | - | NA19191 | M | O | O                               | O,P | - |   |
| YRI | 15 | NA19190 | F | P | P                               | O,P | - | NA19191 | M | O | O                               | O,P | - |   |
| YRI | 20 | NA19113 | M | P | P                               | O,P | - | NA19115 | F | O | O                               | O,P | - |   |
| YRI | 20 | NA19114 | F | P | P                               | O,P | - | NA19115 | F | O | O                               | O,P | - |   |
| YRI | 24 | NA19095 | F | P | P                               | O,P | - | NA19097 | F | O | O                               | O,P | - |   |
| YRI | 24 | NA19096 | M | P | P                               | O,P | - | NA19097 | F | O | O                               | O,P | - |   |
| YRI | 26 | NA18909 | F | P | P                               | O,P | - | NA18911 | M | O | O                               | O,P | - |   |
| YRI | 26 | NA18910 | M | P | P                               | O,P | - | NA18911 | M | O | O                               | O,P | - |   |
| YRI | 29 | NA19247 | F | P | P                               | O,P | - | NA19249 | M | O | O                               | O,P | - |   |
| YRI | 29 | NA19248 | M | P | P                               | O,P | - | NA19249 | M | O | O                               | O,P | - |   |
| YRI | 31 | NA18485 | M | O | O                               | O,P | - | NA18487 | M | P | P                               | O,P | - |   |
| YRI | 31 | NA18485 | M | O | O                               | O,P | - | NA18489 | F | P | P                               | O,P | - |   |
| YRI | 32 | NA19181 | M | P | P                               | O,P | - | NA19183 | F | O | O                               | O,P | - |   |
| YRI | 32 | NA19182 | F | P | P                               | O,P | - | NA19183 | F | O | O                               | O,P | - |   |
| YRI | 33 | NA19256 | M | P | P                               | O,P | - | NA19258 | M | O | O                               | O,P | - |   |
| YRI | 33 | NA19257 | F | P | P                               | O,P | - | NA19258 | M | O | O                               | O,P | - |   |
| YRI | 34 | NA19117 | M | P | P                               | O,P | - | NA19174 | M | O | O                               | O,P | - |   |
| YRI | 34 | NA19118 | F | P | P                               | O,P | - | NA19174 | M | O | O                               | O,P | - |   |
| YRI | 38 | NA18518 | F | O | O                               | O,P | - | NA18519 | M | P | P                               | O,P | - |   |
| YRI | 38 | NA18518 | F | O | O                               | O,P | - | NA18520 | F | P | P                               | O,P | - |   |
| YRI | 39 | NA19213 | M | P | P                               | O,P | - | NA19215 | F | O | O                               | O,P | - |   |
| YRI | 39 | NA19214 | F | P | P                               | O,P | - | NA19215 | F | O | O                               | O,P | - |   |
| YRI | 41 | NA19197 | F | P | P                               | O,P | - | NA19199 | F | O | O                               | O,P | - |   |
| YRI | 41 | NA19198 | M | P | P                               | O,P | - | NA19199 | F | O | O                               | O,P | - |   |
| YRI | 46 | NA19121 | M | P | P                               | O,P | - | NA19123 | M | O | O                               | O,P | - |   |
| YRI | 46 | NA19122 | F | P | P                               | O,P | - | NA19123 | M | O | O                               | O,P | - |   |
| YRI | 47 | NA18916 | F | P | P                               | O,P | - | NA18930 | F | O | O                               | O,P | - |   |
| YRI | 47 | NA18917 | M | P | P                               | O,P | - | NA18930 | F | O | O                               | O,P | - |   |
| YRI | 48 | NA18933 | F | P | P                               | O,P | - | NA18935 | M | O | O                               | O,P | - |   |
| YRI | 48 | NA18934 | M | P | P                               | O,P | - | NA18935 | M | O | O                               | O,P | - |   |
| YRI | 49 | NA18923 | M | P | P                               | O,P | - | NA18925 | M | O | O                               | O,P | - |   |
| YRI | 49 | NA18924 | F | P | P                               | O,P | - | NA18925 | M | O | O                               | O,P | - |   |
| YRI | 52 | NA18497 | M | O | O                               | O,P | - | NA18498 | M | P | P                               | O,P | - |   |
| YRI | 52 | NA18497 | M | O | O                               | O,P | - | NA18499 | F | P | P                               | O,P | - |   |
| YRI | 62 | NA18867 | F | P | P                               | O,P | - | NA18869 | M | O | O                               | O,P | - |   |
| YRI | 62 | NA18868 | M | P | P                               | O,P | - | NA18869 | M | O | O                               | O,P | - |   |

|     |     |         |   |   |       |     |    |         |   |   |       |     |    |   |
|-----|-----|---------|---|---|-------|-----|----|---------|---|---|-------|-----|----|---|
| YRI | 65  | NA19107 | M | P | P     | O,P | -  | NA19109 | F | O | O     | O,P | -  |   |
| YRI | 65  | NA19108 | F | P | P     | O,P | -  | NA19109 | F | O | O     | O,P | -  |   |
| YRI | 66  | NA19235 | F | P | P     | O,P | -  | NA19237 | F | O | O     | O,P | -  |   |
| YRI | 66  | NA19236 | M | P | P     | O,P | -  | NA19237 | F | O | O     | O,P | -  |   |
| YRI | 71  | NA19224 | M | O | O     | O,P | -  | NA19225 | F | P | P     | O,P | -  |   |
| YRI | 71  | NA19224 | M | O | O     | O,P | -  | NA19226 | M | P | P     | O,P | -  |   |
| YRI | 81  | NA18509 | M | O | O,P   | O,P | -  | NA18511 | F | P | O,P   | O,P | -  |   |
| YRI | 83  | NA19149 | F | P | P     | O,P | -  | NA19151 | F | O | O     | O,P | -  |   |
| YRI | 83  | NA19150 | M | P | P     | O,P | -  | NA19151 | F | O | O     | O,P | -  |   |
| YRI | 85  | NA18873 | F | P | P     | O,P | -  | NA18875 | F | O | O     | O,P | -  |   |
| YRI | 85  | NA18874 | M | P | P     | O,P | -  | NA18875 | F | O | O     | O,P | -  |   |
| YRI | 86  | NA18503 | M | O | O     | O,P | -  | NA18504 | M | P | P     | O,P | -  |   |
| YRI | 86  | NA18503 | M | O | O     | O,P | -  | NA18505 | F | P | P     | O,P | -  |   |
| YRI | 91  | NA19137 | F | P | P     | O,P | -  | NA19139 | M | O | O     | O,P | -  |   |
| YRI | 91  | NA19138 | M | P | P     | O,P | -  | NA19139 | M | O | O     | O,P | -  |   |
| YRI | 92  | NA19152 | F | P | P     | O,P | -  | NA19154 | M | O | O     | O,P | -  |   |
| YRI | 92  | NA19153 | M | P | P     | O,P | -  | NA19154 | M | O | O     | O,P | -  |   |
| YRI | 94  | NA19221 | F | O | O     | O,P | -  | NA19222 | F | P | P     | O,P | -  |   |
| YRI | 94  | NA19221 | F | O | O     | O,P | -  | NA19223 | M | P | P     | O,P | -  |   |
| YRI | 95  | NA18500 | M | O | O,P   | O,P | -  | NA18501 | M | P | O,P   | O,P | -  |   |
| YRI | 105 | NA18870 | F | P | P     | O,P | -  | NA18872 | M | O | O     | O,P | -  |   |
| YRI | 105 | NA18871 | M | P | P     | O,P | -  | NA18872 | M | O | O     | O,P | -  |   |
| YRI | 109 | NA18861 | F | P | P     | O,P | -  | NA18863 | M | O | O     | O,P | -  |   |
| YRI | 109 | NA18862 | M | P | P     | O,P | -  | NA18863 | M | O | O     | O,P | -  |   |
| YRI | 110 | NA18855 | F | P | O,P   | O,P | -  | NA18857 | M | O | O,P   | O,P | -  |   |
| YRI | 115 | NA19171 | M | P | P     | O,P | -  | NA19173 | M | O | O     | O,P | -  |   |
| YRI | 115 | NA19172 | F | P | P     | O,P | -  | NA19173 | M | O | O     | O,P | -  |   |
| YRI | 117 | NA18515 | M | O | O     | O,P | -  | NA18516 | M | P | P     | O,P | -  |   |
| YRI | 117 | NA18515 | M | O | O     | O,P | -  | NA18517 | F | P | P     | O,P | -  |   |
| YRI | 122 | NA18912 | F | P | P     | O,P | -  | NA18914 | M | O | O     | O,P | -  |   |
| YRI | 122 | NA18913 | M | P | P     | O,P | -  | NA18914 | M | O | O     | O,P | -  |   |
| YRI | 122 | NA18913 | M | - | O,P   | O,P | -  | NA19238 | F | - | O,P   | O,P | -  |   |
| YRI | 122 | NA18913 | M | - | G,H   | H   | -  | NA19240 | F | - | C,H   | H   | -  |   |
| YRI | 122 | NA18914 | M | - | C,H   | C   | -  | NA19238 | F | - | G,H   | G   | -  |   |
| YRI | 122 | NA18914 | M | - | HA,HN | -   | HN | NA19240 | F | - | HA,HN | -   | HA | ? |
| YRI | 122 | NA19238 | F | P | P     | O,P | -  | NA19240 | F | O | O     | O,P | -  |   |
| YRI | 122 | NA19239 | M | P | P     | O,P | -  | NA19240 | F | O | O     | O,P | -  |   |
| YRI | 131 | NA19209 | F | P | P     | O,P | -  | NA19211 | M | O | O     | O,P | -  |   |
| YRI | 131 | NA19210 | M | P | P     | O,P | -  | NA19211 | M | O | O     | O,P | -  |   |
| YRI | 133 | NA18506 | M | O | O     | O,P | -  | NA18507 | M | P | P     | O,P | -  |   |
| YRI | 133 | NA18506 | M | O | O     | O,P | -  | NA18508 | F | P | P     | O,P | -  |   |
| YRI | 134 | NA19159 | F | P | P     | O,P | -  | NA19161 | M | O | O     | O,P | -  |   |
| YRI | 134 | NA19160 | M | P | P     | O,P | -  | NA19161 | M | O | O     | O,P | -  |   |
| YRI | 141 | NA18858 | F | P | P     | O,P | -  | NA18860 | M | O | O     | O,P | -  |   |
| YRI | 141 | NA18859 | M | P | P     | O,P | -  | NA18860 | M | O | O     | O,P | -  |   |

|     |     |         |   |   |                |     |    |         |   |   |                |     |    |   |
|-----|-----|---------|---|---|----------------|-----|----|---------|---|---|----------------|-----|----|---|
| YRI | 149 | NA19127 | F | P | P              | O,P | -  | NA19129 | F | O | O              | O,P | -  |   |
| YRI | 149 | NA19128 | M | P | P              | O,P | -  | NA19129 | F | O | O              | O,P | -  |   |
| YRI | 150 | NA19130 | M | P | P              | O,P | -  | NA19132 | F | O | O              | O,P | -  |   |
| YRI | 150 | NA19130 | M | - | A,C,G,H,N      | AV  | -  | NA19192 | M | - | A,C,G,H,N      | AV  | -  | ? |
| YRI | 150 | NA19130 | M | - | 1C,GA,GG,HA,HN | -   | 1C | NA19194 | M | - | 1C,GC,GN,HA,HN | -   | 1C | ? |
| YRI | 150 | NA19131 | F | P | P              | O,P | -  | NA19132 | F | O | O              | O,P | -  |   |
| YRI | 150 | NA19132 | F | - | 1C,GC,GN,HA,HN | -   | GN | NA19192 | M | - | 1C,GA,GG,HA,HN | -   | GA | ? |
| YRI | 150 | NA19192 | M | P | P              | O,P | -  | NA19194 | M | O | O              | O,P | -  |   |
| YRI | 150 | NA19193 | F | P | P              | O,P | -  | NA19194 | M | O | O              | O,P | -  |   |
| YRI | 152 | NA19116 | F | P | P              | O,P | -  | NA19120 | M | O | O              | O,P | -  |   |
| YRI | 152 | NA19119 | M | P | P              | O,P | -  | NA19120 | M | O | O              | O,P | -  |   |
| YRI | 155 | NA19093 | F | P | O,P            | O,P | -  | NA19094 | F | O | O,P            | O,P | -  |   |
| YRI | 157 | NA18852 | F | P | P              | O,P | -  | NA18854 | M | O | O              | O,P | -  |   |
| YRI | 157 | NA18853 | M | P | P              | O,P | -  | NA18854 | M | O | O              | O,P | -  |   |
| YRI | 160 | NA19140 | F | P | P              | O,P | -  | NA19142 | M | O | O              | O,P | -  |   |
| YRI | 160 | NA19141 | M | P | P              | O,P | -  | NA19142 | M | O | O              | O,P | -  |   |
| YRI | 164 | NA19206 | F | P | P              | O,P | -  | NA19208 | M | O | O              | O,P | -  |   |
| YRI | 164 | NA19207 | M | P | P              | O,P | -  | NA19208 | M | O | O              | O,P | -  |   |
| YRI | 165 | NA19101 | M | P | P              | O,P | -  | NA19103 | M | O | O              | O,P | -  |   |
| YRI | 165 | NA19102 | F | P | P              | O,P | -  | NA19103 | M | O | O              | O,P | -  |   |

Notes column codes:

**P** – PRIMUS provides more precise relationship prediction than other methods.

**P\*** - PRIMUS provides corrected relationship results.

**?** – One of the other methods reported a more precise relationship prediction than PRIMUS; however, we found several instances where these predictions are incomplete (i.e., the authors failed to recognize that there are more than one possible way to fit the pairwise relationships into a pedigree) or inaccurate.

**R** – Pemberton et al. prediction was based on RELPAIR results.

**R\*** - The Pemberton et al. reported relationship is based on manually reconstructed pedigrees, and it disagrees with the relationship that RELPAIR predicted.

**R<sup>§</sup>** - Pemberton et al. could not reconcile the predicted 2<sup>nd</sup> degree relationship with their manually reconstructed pedigree structure.

**N** – A possible 3<sup>rd</sup> degree relationship that was unreported in Pemberton et al.<sup>6</sup> and Kyriazopoulou-Panagiotopoulou et al.<sup>1</sup>. However, the MKK population is reported as a small, isolated population, which results in a low level of background relatedness among the samples. The background relatedness can make individuals appear more closely related than they actually are.

| Code | Relationship                                    |
|------|-------------------------------------------------|
| P    | Parent                                          |
| O    | Off-spring                                      |
| F    | Full-sibling                                    |
| G    | Grandparent                                     |
| C    | Grandchild                                      |
| A    | Uncle/Aunt                                      |
| N    | Neice/Nephew                                    |
| H    | Half-sibling                                    |
| GG   | Great-Grandparent                               |
| GC   | Great-Grandchild                                |
| GA   | Great-Aunt/Uncle                                |
| GN   | Great-Neice/Nephew                              |
| HA   | Half-uncle/aunt                                 |
| HN   | half-neice/nephew                               |
| 1C   | First cousin                                    |
| U    | Uncertain                                       |
| UN   | Unrelated (4th degree or more distant relative) |

We used a minimum coefficient of relatedness of 0.09875 (3<sup>rd</sup> degree relatives or closer) to build the relationship networks for all of HapMap3; however, one family network in the Maasai in Kinyawa, Kenya, (MKK population) contained 126 individuals connected by 3<sup>rd</sup> degree relationships or closer, and it resulted in a number of possible pedigrees that were computationally infeasible. So, for the MKK population we used a minimum coefficient of relatedness of 0.168 (to include all 2<sup>nd</sup> degree relatives and closer), resulting in more manageable family network sizes. One MKK family still contained 61 individuals (Network 16 in this table). To reconstruct this network, we broke it into nine sub-networks each containing four to eight closely related samples. We ran PRIMUS on each pair of sub-networks in order to reconstruct relationships between the sub-networks.

Table S6. Possible combinations of pairwise 2<sup>nd</sup> and 3<sup>rd</sup> degree family relationships that are considered during reconstruction.

| 2 <sup>nd</sup> degree relationship between A and B | A                 | B              |
|-----------------------------------------------------|-------------------|----------------|
| 1. Half-sib through mother                          | Half-sib          | Half-sib       |
| 2. Half-sib through father                          | Half-sib          | Half-sib       |
| 3. Avuncular through mother                         | Nephew            | Uncle          |
| 4. Avuncular through mother                         | Uncle             | Nephew         |
| 5. Avuncular through father                         | Nephew            | Uncle          |
| 6. Avuncular through father                         | Uncle             | Nephew         |
| 7. Grandparent through father                       | Grandfather       | Grandson       |
| 8. Grandparent through father                       | Grandson          | Grandfather    |
| 9. Grandparent through mother                       | Grandfather       | Grandson       |
| 10. Grandparent through mother                      | Grandson          | Grandfather    |
|                                                     |                   |                |
| 3 <sup>rd</sup> degree relationship between A and B | A                 | B              |
| 1. Cousins through A mom and B mom                  | Cousins           | Cousins        |
| 2. Cousins through A mom and B dad                  | Cousins           | Cousins        |
| 3. Cousins through A dad and B mom                  | Cousins           | Cousins        |
| 4. Cousins through A dad and B dad                  | Cousins           | Cousins        |
| 5. Great-grandparental through mom's mom            | Great-grandfather | Great-grandson |
| 6. Great-grandparental through dad's mom            | Great-grandfather | Great-grandson |
| 7. Great-grandparental through mom's dad            | Great-grandfather | Great-grandson |
| 8. Great-grandparental through dad's dad            | Great-grandfather | Great-grandson |



|                                           |                |                   |
|-------------------------------------------|----------------|-------------------|
| 9. Great-grandparental through mom's mom  | Great-grandson | Great-grandfather |
| 10. Great-grandparental through dad's mom | Great-grandson | Great-grandfather |
| 11. Great-grandparental through mom's dad | Great-grandson | Great-grandfather |
| 12. Great-grandparental through dad's dad | Great-grandson | Great-grandfather |
| 13. Grand-avuncular through mom's mom     | Grand-uncle    | Grand-nephew      |
| 14. Grand-avuncular through dad's mom     | Grand-uncle    | Grand-nephew      |
| 15. Grand-avuncular through mom's dad     | Grand-uncle    | Grand-nephew      |
| 16. Grand-avuncular through dad's dad     | Grand-uncle    | Grand-nephew      |
| 17. Grand-avuncular through mom's mom     | Grand-nephew   | Grand-uncle       |
| 18. Grand-avuncular through dad's mom     | Grand-nephew   | Grand-uncle       |
| 19. Grand-avuncular through mom's dad     | Grand-nephew   | Grand-uncle       |
| 20. Grand-avuncular through dad's dad     | Grand-nephew   | Grand-uncle       |
| 21. Half-avuncular through mom's mom      | Half-uncle     | Half-nephew       |
| 22. Half-avuncular through dad's mom      | Half-uncle     | Half-nephew       |
| 23. Half-avuncular through mom's dad      | Half-uncle     | Half-nephew       |
| 24. Half-avuncular through dad's dad      | Half-uncle     | Half-nephew       |
| 25. Half-avuncular through mom's mom      | Half-nephew    | Half-uncle        |
| 26. Half-avuncular through dad's mom      | Half-nephew    | Half-uncle        |
| 27. Half-avuncular through mom's dad      | Half-nephew    | Half-uncle        |
| 28. Half-avuncular through dad's dad      | Half-nephew    | Half-uncle        |

As the degree of relatedness increases from 2<sup>nd</sup> to 3<sup>rd</sup> degree, there are far more relationships to test during reconstruction. Continuing to 4<sup>th</sup> degree relatives would require testing even more relationships.

### Supplemental References

1. Kyriazopoulou-Panagiotopoulou, S., Kashef Haghighi, D., Aerni, S.J., Sundquist, A., Bercovici, S., and Batzoglou, S. (2011). Reconstruction of genealogical relationships with applications to Phase III of HapMap. *Bioinformatics* 27, i333-341.
2. Shem-Tov, D., and Halperin, E. (2014). Historical pedigree reconstruction from extant populations using PArtitioning of RELatives (PREPARE). *PLoS computational biology* 10, e1003610.
3. He, D., Wang, Z., Han, B., Parida, L., and Eskin, E. (2013). IPED: inheritance path-based pedigree reconstruction algorithm using genotype data. *Journal of computational biology : a journal of computational molecular cell biology* 20, 780-791.
4. Kirkpatrick, B., Li, S.C., Karp, R.M., and Halperin, E. (2011). Pedigree reconstruction using identity by descent. *Journal of computational biology : a journal of computational molecular cell biology* 18, 1481-1493.
5. Epstein, M.P., Duren, W.L., and Boehnke, M. (2000). Improved inference of relationships for pairs of individuals. *American journal of human genetics* 67, 1219-1231.
6. Pemberton, T.J., Wang, C., Li, J.Z., and Rosenberg, N.A. (2010). Inference of unexpected genetic relatedness among individuals in HapMap Phase III. *Am J Hum Genet* 87, 457-464.
